# Supplementary material for: Barriers of attendance to dog rabies static point vaccination clinics in Blantyre, Malawi
Source: PubMed Central journal article supplement (PMC5783422; doi:10.1371/journal.pntd.0006159), 2018-01-11
Supplement: pntd.0006159.s005.pdf [file pntd.0006159.s005.pdf]

Table S3: **Results of the final multivariable logistic regression model predicting attendance to SP.** Estimates and 95 % confidence intervals of the final multivariable logistic regression model predicting attendance to SP.

| <b>Variable</b>             | <b>Odds Ratio</b> | <b>Lower<br/>95% CI</b> | <b>Upper<br/>95% CI</b> | <b>p value</b> |
|-----------------------------|-------------------|-------------------------|-------------------------|----------------|
| <b>Distance to SP (km)</b>  | 0.30              | 0.24                    | 0.39                    | 0.00           |
| <b>Poverty &lt; \$1.25*</b> |                   |                         |                         |                |
| Poverty: q1                 | Reference         |                         |                         |                |
| Poverty: q2                 | 1.58              | 1.17                    | 2.13                    | 0.00           |
| Poverty: q3                 | 2.22              | 1.61                    | 3.06                    | 0.00           |
| Poverty: q3                 | 2.22              | 1.61                    | 3.06                    | 0.00           |
| <b>Distance * Poverty</b>   |                   |                         |                         |                |
| Distance * Poverty q1       | Reference         |                         |                         |                |
| Distance * Poverty q2       | 0.94              | 0.66                    | 1.34                    | 0.73           |
| Distance * Poverty q3       | 0.69              | 0.49                    | 0.96                    | 0.03           |
| Distance * Poverty q4       | 0.66              | 0.49                    | 0.89                    | 0.01           |
| <b>Housing density</b>      |                   |                         |                         |                |
| Low                         | Reference         |                         |                         |                |
| Medium                      | 1.58              | 1.39                    | 1.80                    | 0.00           |
| High                        | 1.61              | 1.38                    | 1.88                    | 0.00           |
| <b>Age</b>                  |                   |                         |                         |                |
| Adult                       | Reference         |                         |                         |                |
| Age: Puppy                  | 0.26              | 0.23                    | 0.29                    | 0.00           |
| <b>Sex</b>                  |                   |                         |                         |                |
| Female                      | Reference         |                         |                         |                |
| Sex: preg/lact female       | 0.60              | 0.50                    | 0.71                    | 0.00           |
| Sex: male                   | 1.13              | 1.04                    | 1.23                    | 0.00           |
| Sex: unknown                | 0.42              | 0.30                    | 0.58                    | 0.00           |
| <b>Neuter status</b>        |                   |                         |                         |                |
| Entire                      | Reference         |                         |                         |                |
| Neutered                    | 1.29              | 1.11                    | 1.48                    | 0.00           |
| Unknown                     | 1.37              | 1.07                    | 1.75                    | 0.01           |
| <b>Confinement level</b>    |                   |                         |                         |                |
| Always Roaming              | Reference         |                         |                         |                |
| Roaming Daily               | 1.19              | 1.07                    | 1.33                    | 0.00           |
| Roaming Weekly              | 0.83              | 0.52                    | 1.34                    | 0.45           |
| Never Roaming               | 0.74              | 0.66                    | 0.82                    | 0.00           |
| Unknown                     | 0.93              | 0.76                    | 1.16                    | 0.54           |
| <b>Health status</b>        |                   |                         |                         |                |
| Disease                     | Reference         |                         |                         |                |
| Healthy                     | 2.37              | 2.07                    | 2.72                    | 0.00           |
| Unknown                     | 15.07             | 11.69                   | 19.43                   | 0.00           |

\*Poverty: proportion of people living in poverty per grid square (earning < \$1.25/day)
