# Supplementary material for: Barriers of attendance to dog rabies static point vaccination clinics in Blantyre, Malawi
Source: PLoS Negl Trop Dis. 2018 Jan 11;12(1):e0006159. doi: 10.1371/journal.pntd.0006159 (PMC5783422; doi:10.1371/journal.pntd.0006159)
Supplement: S1 Dataset — Csv file containing spreadsheet of data used for this analysis. Please note that GPS locations were removed for protection of privacy. (CSV) [file pntd.0006159.s001.csv]

	SPdistance	housing_density	landcover	landuse	pov2013_125	pov2013_200	sex	sex2	age	preglact_status	ownership_status	confinement_level	neuter_status	health_status	SP_yescorrect
1	1.40381609666957	Low	3	NA	0.0406551957130432	0.208095669746399	female	female	adult	not_preglact	owned	never roaming	entire	healthy	0
2	1.34776756185801	Medium	5	residential	0.0407703518867493	0.209913432598114	female	female	adult	not_preglact	owned	never roaming	entire	healthy	0
3	1.28798267964732	Medium	5	residential	0.0407703518867493	0.209913432598114	female	female	adult	not_preglact	owned	never roaming	entire	healthy	0
4	1.28510713138862	Medium	5	residential	0.0407703518867493	0.209913432598114	female	female_preg/lact	adult	yes_preg	owned	never roaming	entire	healthy	0
5	1.27214468432167	Medium	5	residential	0.0407703518867493	0.209913432598114	male	male	adult		owned	never roaming	neutered	healthy	0
6	1.26755420379753	Medium	5	residential	0.0407703518867493	0.209913432598114	male	male	adult		owned	never roaming	entire	healthy	1
7	1.28749838334385	Medium	5	residential	0.0407703518867493	0.209913432598114	female	female	adult	not_preglact	owned	never roaming	neutered	healthy	0
8	1.287948465698	Medium	5	residential	0.0407703518867493	0.209913432598114	male	male	puppy		owned	never roaming	entire	healthy	0
9	1.28830554658351	Medium	5	residential	0.0407703518867493	0.209913432598114	male	male	adult		owned	never roaming	neutered	healthy	0
10	1.19405825205887	Medium	5	residential	0.0407703518867493	0.209913432598114	male	male	adult		stray	NA	entire	healthy	0
11	1.17357148489217	Medium	5	residential	0.0407703518867493	0.209913432598114	male	male	adult		owned	never roaming	neutered	healthy	0
12	1.16937320534706	Medium	5	residential	0.0407703518867493	0.209913432598114	male	male	adult		owned	never roaming	entire	healthy	0
13	1.03248061683292	Medium	5	residential	0.0531797409057617	0.227031588554382	female	female	puppy	not_preglact	owned	never roaming	entire	healthy	0
14	1.03080126351205	Medium	5	residential	0.0531797409057617	0.227031588554382	female	female	adult	not_preglact	owned	never roaming	entire	healthy	0
15	0.894540409542157	Medium	5	residential	0.0531797409057617	0.227031588554382	male	male	adult		owned	never roaming	neutered	healthy	0
16	0.893498947841034	Medium	5	residential	0.0531797409057617	0.227031588554382	female	female	adult	not_preglact	owned	roaming	entire	healthy	1
17	0.958961675332673	Medium	5	residential	0.0531797409057617	0.227031588554382	female	female	adult	not_preglact	owned	roaming	entire	healthy	1
18	0.971239605984379	Medium	5	residential	0.0531797409057617	0.227031588554382	female	female	adult	not_preglact	owned	never roaming	entire	healthy	0
19	0.97161508991198	Medium	5	residential	0.0531797409057617	0.227031588554382	male	male	adult		owned	never roaming	neutered	healthy	0
20	1.00311843736857	Medium	5	residential	0.0531797409057617	0.227031588554382	male	male	adult		owned	never roaming	entire	healthy	0
21	1.19423970196224	Medium	5	residential	0.0531797409057617	0.227031588554382	male	male	adult		owned	never roaming	entire	healthy	0
22	1.19324415700873	Medium	5	residential	0.0531797409057617	0.227031588554382	male	male	adult		owned	never roaming	entire	healthy	0
23	1.1865878195009	Medium	5	residential	0.0531797409057617	0.227031588554382	male	male	adult		owned	never roaming	entire	healthy	0
24	1.16972057172015	Medium	5	residential	0.0531797409057617	0.227031588554382	female	female	adult	not_preglact	owned	never roaming	entire	healthy	0
25	1.16972057172015	Medium	5	residential	0.0531797409057617	0.227031588554382	male	male	adult		owned	never roaming	entire	healthy	0
26	0.972240890162595	Medium	5	residential	0.0531797409057617	0.227031588554382	female	female	adult	not_preglact	owned	never roaming	entire	healthy	0
27	0.971632743383153	Medium	5	residential	0.0531797409057617	0.227031588554382	female	female_preg/lact	adult	yes_lact	owned	never roaming	entire	healthy	0
28	0.973198955607123	Medium	5	residential	0.0531797409057617	0.227031588554382	male	male	adult		stray	NA	entire	healthy	0
29	0.961822564964999	Medium	5	residential	0.0531797409057617	0.227031588554382	male	male	adult		stray	NA	entire	healthy	0
30	0.926024568369926	Medium	5	residential	0.0531797409057617	0.227031588554382	male	male	adult		stray	NA	entire	healthy	0
31	0.926024568369926	Medium	5	residential	0.0531797409057617	0.227031588554382	male	male	adult		stray	NA	entire	healthy	0
32	0.92669753163351	Medium	5	residential	0.0531797409057617	0.227031588554382	male	male	adult		stray	NA	entire	healthy	0
33	0.92669753163351	Medium	5	residential	0.0531797409057617	0.227031588554382	female	female	puppy	not_preglact	stray	NA	entire	healthy	0
34	0.92715793469583	Medium	5	residential	0.0531797409057617	0.227031588554382	male	male	puppy		stray	NA	entire	healthy	0
35	0.92715793469583	Medium	5	residential	0.0531797409057617	0.227031588554382	female	female	puppy	not_preglact	stray	NA	entire	healthy	0
36	0.92715793469583	Medium	5	residential	0.0531797409057617	0.227031588554382	female	female	puppy	not_preglact	stray	NA	entire	healthy	0
37	0.92715793469583	Medium	5	residential	0.0531797409057617	0.227031588554382	female	female	puppy	not_preglact	owned	never roaming	entire	healthy	0
38	0.92715793469583	Medium	5	residential	0.0531797409057617	0.227031588554382	male	male	adult		owned	never roaming	entire	healthy	0
39	0.927138388179868	Medium	5	residential	0.0531797409057617	0.227031588554382	male	male	adult		owned	never roaming	entire	healthy	0
40	0.934049735592074	Medium	5	residential	0.0531797409057617	0.227031588554382	male	male	adult		owned	never roaming	neutered	healthy	0
41	0.931487235397899	Medium	5	residential	0.0531797409057617	0.227031588554382	female	female	adult	not_preglact	owned	never roaming	neutered	healthy	0
42	0.929406570536025	Medium	5	residential	0.0531797409057617	0.227031588554382	male	male	adult		owned	never roaming	entire	healthy	0
43	0.93135741742173	Medium	5	residential	0.0531797409057617	0.227031588554382	male	male	adult		owned	never roaming	entire	healthy	0
44	0.930859554624117	Medium	5	residential	0.0531797409057617	0.227031588554382	male	male	adult		owned	never roaming	entire	healthy	0
45	0.932384736123435	Medium	5	residential	0.0531797409057617	0.227031588554382	male	male	adult		owned	never roaming	neutered	healthy	0
46	0.929773119267169	Medium	5	residential	0.0531797409057617	0.227031588554382	male	male	puppy		owned	never roaming	entire	healthy	0
47	0.928558517280735	Medium	5	residential	0.0531797409057617	0.227031588554382	female	female	adult	not_preglact	stray	NA	entire	disease	0
48	0.928558517280735	Medium	5	residential	0.0531797409057617	0.227031588554382	male	male	puppy		owned	never roaming	entire	healthy	0
49	0.916349489368382	Medium	5	residential	0.0531797409057617	0.227031588554382	male	male	adult		stray	NA	neutered	healthy	0
50	0.915741507109726	Medium	5	residential	0.0531797409057617	0.227031588554382	male	male	adult		owned	never roaming	neutered	healthy	0
51	0.915741507109726	Medium	5	residential	0.0531797409057617	0.227031588554382	male	male	adult		owned	never roaming	entire	healthy	0
52	0.168651818430592	Low	5	residential	0.0378057360649109	0.193607926368713	male	male	adult		owned	never roaming	entire	healthy	0
53	0.44059988777175	Low	5	residential	0.0378057360649109	0.193607926368713	female	female	adult	not_preglact	owned	never roaming	entire	healthy	0
54	1.1040292125743	Low	5	residential	0.0378363132476807	0.195681393146515	female	female	adult	not_preglact	owned	never roaming	entire	healthy	0
55	1.33553033994675	Low	5	residential	0.0378363132476807	0.195681393146515	female	female	adult	not_preglact	owned	never roaming	entire	disease	0
56	1.34913120495274	Low	5	residential	0.0378363132476807	0.195681393146515	male	male	adult		owned	never roaming	entire	healthy	0
57	1.34401566151151	Low	5	residential	0.0378363132476807	0.195681393146515	female	female	adult	not_preglact	owned	never roaming	entire	disease	0
58	0.951474389865794	Medium	5	residential	0.0459426641464233	0.185511410236359	male	male	adult		owned	roaming	entire	healthy	1
59	0.951173112062604	Medium	5	residential	0.0459426641464233	0.185511410236359	female	female	adult	not_preglact	owned	roaming	entire	healthy	1
60	0.952831449560021	Medium	5	residential	0.0459426641464233	0.185511410236359	male	male	adult		owned	roaming	entire	healthy	1
61	0.955020462232784	Medium	5	residential	0.0459426641464233	0.185511410236359	female	female	puppy	not_preglact	owned	roaming	entire	healthy	1
62	0.468648948602002	High	5	residential	0.059701144695282	0.187464237213135	male	male	adult		owned	never roaming	entire	healthy	0
63	0.962092991889533	Medium	5	residential	0.0459426641464233	0.185511410236359	male	male	adult		owned	never roaming	entire	disease	1
64	0.967512372428956	Medium	5	residential	0.0459426641464233	0.185511410236359	female	female_preg/lact	adult	yes_lact	owned	roaming	entire	healthy	1
65	0.443765457901191	Medium	5	NA	0.0404516458511353	0.208404958248138	male	male	adult		owned	never roaming	entire	disease	0
66	0.395825884159901	High	5	residential	0.0505467057228088	0.20075660943985	male	male	adult		owned	roaming	entire	healthy	1
67	0.895903575025087	Low	5	residential	0.0448150634765625	0.160409808158875	male	male	adult		owned	roaming	entire	healthy	0
68	0.305725690125971	Medium	5	residential	0.0407751202583313	0.178423881530762	male	male	adult		owned	NA	unknown_neuter	unknown_health	1
69	0.481315972006366	High	5	residential	0.059701144695282	0.187464237213135	male	male	adult		owned	never roaming	entire	healthy	0
70	0.35012252074478	Medium	5	residential	0.0463465452194214	0.173745393753052	male	male	puppy		owned	NA	unknown_neuter	unknown_health	1
71	0.398316823489573	High	5	residential	0.0505467057228088	0.20075660943985	male	male	adult		owned	roaming	unknown_neuter	healthy	0
72	1.01124632525142	Medium	5	residential	0.0459426641464233	0.185511410236359	male	male	puppy		owned	roaming	entire	healthy	1
73	0.768664916990468	Medium	5	NA	0.0463465452194214	0.173745393753052	male	male	adult		owned	roaming	entire	disease	0
74	1.05053957795579	Medium	5	residential	0.0459426641464233	0.185511410236359	female	female	adult	not_preglact	owned	roaming	entire	disease	0
75	0.354547947658902	Medium	5	residential	0.0463465452194214	0.173745393753052	male	male	puppy		owned	NA	entire	unknown_health	1
76	0.360983480299946	Medium	5	residential	0.0463465452194214	0.173745393753052	male	male	puppy		owned	NA	unknown_neuter	unknown_health	1
77	0.768664916990468	Medium	5	NA	0.0463465452194214	0.173745393753052	female	female	adult	not_preglact	owned	roaming	entire	healthy	0
78	0.452196131607129	Medium	5	residential	0.0463465452194214	0.173745393753052	female	female	adult	not_preglact	owned	never roaming	entire	disease	0
79	0.355923696423139	Medium	5	residential	0.0463465452194214	0.173745393753052	male	male	puppy		owned	NA	unknown_neuter	unknown_health	1
80	1.53351405724179	Medium	5	residential	0.0406551957130432	0.208095669746399	female	female	adult	not_preglact	owned	never roaming	neutered	healthy	0
81	1.02384476557857	Low	5	residential	0.0949823260307312	0.330526471138	female	female	puppy	not_preglact	owned	NA	entire	healthy	0
82	0.452883383105896	Medium	5	residential	0.0463465452194214	0.173745393753052	male	male	adult		owned	never roaming	entire	disease	0
83	0.487460270918756	High	5	residential	0.059701144695282	0.187464237213135	male	male	puppy		owned	never roaming	entire	healthy	0
84	0.768230563769427	Medium	5	NA	0.0463465452194214	0.173745393753052	female	female	adult	not_preglact	owned	roaming	entire	disease	0
85	1.0561014028475	Medium	5	residential	0.038364052772522	0.194374203681946	male	male	adult		owned	never roaming	entire	disease	0
86	0.421117171934006	High	5	residential	0.0505467057228088	0.20075660943985	female	female_preg/lact	adult	yes_lact	owned	roaming	entire	healthy	0
87	0.835229881671138	Medium	5	residential	0.0599033832550049	0.266354203224182	male	male	adult		owned	roaming	entire	healthy	0
88	0.492289557989739	High	5	residential	0.0620661377906799	0.245069324970245	male	male	adult		owned	roaming	entire	healthy	1
89	0.489801970044471	High	5	residential	0.059701144695282	0.187464237213135	female	female_preg/lact	adult	yes_lact	owned	never roaming	entire	healthy	0
90	0.771143691873677	Medium	5	NA	0.0463465452194214	0.173745393753052	male	male	adult		owned	roaming	entire	disease	0
91	0.491427811966045	High	5	residential	0.059701144695282	0.187464237213135	female	female	adult	not_preglact	owned	never roaming	entire	healthy	0
92	0.491564891569954	High	5	residential	0.0620661377906799	0.245069324970245	male	male	adult		owned	roaming	entire	healthy	1
93	0.422616142702766	High	5	residential	0.0505467057228088	0.20075660943985	male	male	adult		owned	never roaming	entire	healthy	0
94	0.475665933420523	Medium	5	residential	0.0710569620132446	0.23350864648819	male	male	puppy		owned	never roaming	entire	healthy	1
95	1.04109020385537	Medium	5	residential	0.038364052772522	0.194374203681946	female	female_preg/lact	adult	yes_lact	owned	roaming	entire	healthy	1
96	0.484168943309336	High	5	residential	0.0620661377906799	0.245069324970245	male	male	adult		owned	roaming	entire	healthy	0
97	1.07639389259633	Medium	5	residential	0.038364052772522	0.194374203681946	male	male	adult		owned	roaming	entire	healthy	0
98	1.5641024455301	Medium	5	residential	0.0407703518867493	0.209913432598114	female	female	adult	not_preglact	owned	never roaming	neutered	healthy	0
99	0.747437603971066	Medium	5	NA	0.0463465452194214	0.173745393753052	female	female	adult	unknown_preglact	owned	roaming	unknown_neuter	unknown_health	0
100	1.06509789044445	Medium	5	residential	0.038364052772522	0.194374203681946	male	male	puppy		owned	roaming	entire	healthy	0
101	1.56241521036492	Medium	5	residential	0.0407703518867493	0.209913432598114	male	male	adult		owned	never roaming	entire	healthy	0
102	1.06509789044445	Medium	5	residential	0.038364052772522	0.194374203681946	female	female	puppy	not_preglact	owned	never roaming	entire	healthy	0
103	0.471069252885669	Medium	5	residential	0.0710569620132446	0.23350864648819	female	female	adult	unknown_preglact	owned	roaming	entire	unknown_health	0
104	0.720984472379928	Medium	5	residential	0.0710569620132446	0.23350864648819	female	female	adult	not_preglact	owned	roaming	entire	disease	0
105	1.06509789044445	Medium	5	residential	0.038364052772522	0.194374203681946	female	female	puppy	not_preglact	owned	roaming	entire	healthy	0
106	0.507729191183264	Medium	5	residential	0.0710569620132446	0.23350864648819	male	male	adult		owned	roaming	neutered	healthy	0
107	0.519921337516294	High	5	residential	0.0620661377906799	0.245069324970245	male	male	adult		owned	never roaming	entire	healthy	1
108	0.9086880523862	Low	5	residential	0.0949823260307312	0.330526471138	female	female	puppy	not_preglact	owned	NA	entire	healthy	0
109	0.910333033147388	Low	5	residential	0.0949823260307312	0.330526471138	female	female	adult	not_preglact	owned	NA	entire	healthy	0
110	1.54163625805005	Medium	5	residential	0.0407703518867493	0.209913432598114	female	female_preg/lact	adult	yes_preg	owned	never roaming	entire	healthy	0
111	0.717557960608609	Medium	5	residential	0.0710569620132446	0.23350864648819	male	male	adult		owned	roaming	neutered	disease	1
112	0.751726233004402	Medium	5	NA	0.0463465452194214	0.173745393753052	male	male	adult		owned	never roaming	neutered	healthy	0
113	1.51242482729166	Medium	5	residential	0.0407703518867493	0.209913432598114	male	male	adult		owned	never roaming	entire	healthy	0
114	0.719180704540437	Medium	5	residential	0.0710569620132446	0.23350864648819	female	female	adult	not_preglact	owned	roaming	entire	disease	1
115	1.06509789044445	Medium	5	residential	0.038364052772522	0.194374203681946	male	male	adult		owned	roaming	entire	healthy	1
116	0.467025103445309	High	5	residential	0.0620661377906799	0.245069324970245	female	female	adult	not_preglact	owned	never roaming	entire	disease	1
117	0.751340752761623	Medium	5	NA	0.0463465452194214	0.173745393753052	female	female	adult	not_preglact	owned	never roaming	unknown_neuter	healthy	0
118	0.52862847810874	High	5	residential	0.059701144695282	0.187464237213135	male	male	adult		owned	never roaming	entire	healthy	1
119	0.367496170653883	High	5	residential	0.0505467057228088	0.20075660943985	female	female_preg/lact	adult	yes_lact	owned	roaming	entire	healthy	1
120	0.367496170653883	High	5	residential	0.0505467057228088	0.20075660943985	female	female_preg/lact	adult	yes_lact	owned	roaming	entire	healthy	1
121	0.503637941145779	High	5	residential	0.0620661377906799	0.245069324970245	female	female	adult	not_preglact	owned	never roaming	entire	disease	1
122	2.54470483009705	Low	3	residential	0.17245876789093	0.45440536737442	male	male	puppy		owned	never roaming	entire	healthy	0
123	1.46808038572803	Medium	5	residential	0.0407703518867493	0.209913432598114	male	male	adult		owned	never roaming	entire	healthy	0
124	0.502937424504826	Medium	5	residential	0.0710569620132446	0.23350864648819	male	male	adult		owned	roaming	entire	healthy	1
125	0.502937424504826	Medium	5	residential	0.0710569620132446	0.23350864648819	male	male	adult		owned	roaming	entire	healthy	1
126	0.569890325780492	Medium	5	residential	0.0594974160194397	0.233416020870209	female	female	adult	not_preglact	owned	roaming	entire	healthy	0
127	0.936288909689234	Low	5	residential	0.0949823260307312	0.330526471138	female	female_preg/lact	adult	yes_lact	owned	roaming	entire	healthy	0
128	0.367734691569429	High	5	residential	0.0505467057228088	0.20075660943985	male	male	adult		owned	roaming	entire	healthy	1
129	0.550484697405789	High	5	residential	0.059701144695282	0.187464237213135	male	male	adult		owned	never roaming	entire	healthy	1
130	0.501485706995766	Medium	5	residential	0.0463465452194214	0.173745393753052	female	female	adult	not_preglact	owned	never roaming	entire	healthy	0
131	0.475745971742827	High	5	residential	0.0620661377906799	0.245069324970245	male	male	adult		owned	never roaming	entire	healthy	1
132	0.701951873329953	Medium	5	NA	0.0463465452194214	0.173745393753052	male	male	adult		owned	never roaming	entire	disease	0
133	0.935514333119126	Low	5	residential	0.0949823260307312	0.330526471138	male	male	adult		owned	roaming	entire	healthy	0
134	0.366419731610778	High	5	residential	0.0505467057228088	0.20075660943985	female	female	adult	not_preglact	owned	roaming	entire	healthy	1
135	0.451683422525242	High	5	residential	0.0620661377906799	0.245069324970245	female	female	adult	not_preglact	owned	roaming	entire	disease	1
136	0.365495451107395	High	5	residential	0.0505467057228088	0.20075660943985	female	female	puppy	not_preglact	owned	roaming	entire	healthy	0
137	0.365883512436339	High	5	residential	0.0505467057228088	0.20075660943985	male	male	puppy		owned	roaming	entire	healthy	0
138	0.506609127288026	Medium	5	residential	0.0710569620132446	0.23350864648819	male	male	adult		owned	roaming	neutered	healthy	0
139	0.367704634166209	High	5	residential	0.0505467057228088	0.20075660943985	male	male	puppy		owned	roaming	entire	healthy	0
140	0.995910002411766	Medium	5	residential	0.038285493850708	0.228740394115448	male	male	adult		owned	roaming	entire	healthy	0
141	0.419318174739739	High	5	residential	0.0620661377906799	0.245069324970245	male	male	adult		owned	roaming	entire	healthy	0
142	0.491729540610146	Medium	5	residential	0.0463465452194214	0.173745393753052	female	female	adult	not_preglact	owned	never roaming	entire	healthy	0
143	0.714295263654858	Medium	5	residential	0.0710569620132446	0.23350864648819	male	male	adult		owned	roaming	entire	disease	0
144	0.345052534766665	Medium	5	NA	0.0505467057228088	0.20075660943985	male	male	adult		owned	never roaming	entire	disease	1
145	0.492505065186884	Medium	5	residential	0.0463465452194214	0.173745393753052	male	male	adult		owned	roaming	entire	healthy	0
146	0.992551160612582	Medium	5	residential	0.038285493850708	0.228740394115448	female	female_preg/lact	adult	yes_preg	owned	roaming	entire	healthy	1
147	0.939026461282774	Low	5	residential	0.0949823260307312	0.330526471138	male	male	adult		owned	roaming	entire	healthy	0
148	1.46778654472341	Medium	5	residential	0.0407703518867493	0.209913432598114	male	male	adult		owned	never roaming	entire	healthy	0
149	0.981933365964664	Medium	5	residential	0.0710222125053406	0.274467587471008	male	male	adult		owned	roaming	entire	healthy	0
150	0.981933365964664	Medium	5	residential	0.0710222125053406	0.274467587471008	male	male	adult		owned	roaming	entire	healthy	0
151	1.03416322626547	Medium	5	residential	0.0594974160194397	0.233416020870209	female	female	adult	not_preglact	owned	roaming	entire	healthy	1
152	0.506609127288026	Medium	5	residential	0.0710569620132446	0.23350864648819	male	male	adult		owned	roaming	neutered	healthy	1
153	1.46145224107251	Medium	5	residential	0.0407703518867493	0.209913432598114	male	male	adult		owned	never roaming	neutered	healthy	0
154	0.501326274651426	Medium	5	residential	0.0710569620132446	0.23350864648819	female	female	adult	not_preglact	owned	roaming	entire	healthy	0
155	0.507109597204686	Medium	5	residential	0.0710569620132446	0.23350864648819	male	male	adult		owned	roaming	neutered	disease	1
156	1.46525696025492	Medium	5	residential	0.0407703518867493	0.209913432598114	male	male	adult		owned	never roaming	neutered	healthy	0
157	0.893591467590614	Low	5	residential	0.0949823260307312	0.330526471138	male	male	adult		owned	roaming	entire	healthy	0
158	0.986325591131533	Medium	5	residential	0.0594974160194397	0.233416020870209	male	male	adult		owned	never roaming	entire	healthy	0
159	1.11117454262285	Medium	5	residential	0.038364052772522	0.194374203681946	male	male	adult		owned	roaming	entire	disease	1
160	1.46761643583925	Medium	5	residential	0.0407703518867493	0.209913432598114	male	male	adult		owned	never roaming	neutered	healthy	0
161	0.701637857276997	Medium	5	NA	0.0463465452194214	0.173745393753052	female	female_preg/lact	adult	yes_lact	owned	never roaming	entire	healthy	0
162	0.422317620926632	High	5	residential	0.0620661377906799	0.245069324970245	female	female	adult	not_preglact	owned	roaming	entire	healthy	0
163	1.46628115690631	Medium	5	residential	0.0407703518867493	0.209913432598114	male	male	adult		owned	never roaming	neutered	healthy	0
164	1.46389209090224	Medium	5	residential	0.0407703518867493	0.209913432598114	male	male	adult		owned	never roaming	neutered	healthy	0
165	0.989361489983514	Medium	5	residential	0.0710222125053406	0.274467587471008	female	female_preg/lact	adult	yes_lact	owned	roaming	entire	healthy	0
166	0.894801026889841	Low	5	residential	0.0949823260307312	0.330526471138	female	female	adult	not_preglact	owned	roaming	entire	healthy	0
167	1.44855187204047	Medium	5	residential	0.0407703518867493	0.209913432598114	male	male	adult		owned	never roaming	neutered	healthy	0
168	1.43001541743423	Medium	5	residential	0.0407703518867493	0.209913432598114	female	female	adult	not_preglact	owned	roaming	entire	healthy	0
169	0.991067629602659	Medium	5	residential	0.0710222125053406	0.274467587471008	male	male	adult		owned	never roaming	entire	healthy	0
170	0.59323742467113	High	5	residential	0.059701144695282	0.187464237213135	male	male	adult		owned	NA	entire	disease	0
171	0.662150923685241	Medium	5	NA	0.0463465452194214	0.173745393753052	male	male	puppy		owned	never roaming	entire	healthy	0
172	1.13275139796418	Medium	5	residential	0.038364052772522	0.194374203681946	female	female	adult	not_preglact	owned	never roaming	entire	disease	1
173	1.13275139796418	Medium	5	residential	0.038364052772522	0.194374203681946	female	female	adult	not_preglact	owned	never roaming	entire	disease	1
174	0.427567261706683	High	5	residential	0.0620661377906799	0.245069324970245	male	male	adult		owned	roaming	entire	disease	1
175	0.891492286978851	Low	5	residential	0.0949823260307312	0.330526471138	female	female	adult	not_preglact	owned	roaming	entire	healthy	0
176	1.02773616022701	Medium	5	residential	0.0594974160194397	0.233416020870209	female	female	adult	not_preglact	owned	never roaming	neutered	healthy	1
177	0.988630231395197	Medium	5	residential	0.0710222125053406	0.274467587471008	male	male	adult		owned	never roaming	neutered	healthy	0
178	0.465179272400676	High	5	residential	0.0620661377906799	0.245069324970245	female	female	adult	not_preglact	owned	roaming	entire	disease	1
179	0.664719262724726	Medium	5	NA	0.0463465452194214	0.173745393753052	female	female	puppy	not_preglact	owned	never roaming	entire	healthy	0
180	0.601105751722625	High	5	residential	0.059701144695282	0.187464237213135	female	female	adult	not_preglact	owned	NA	entire	healthy	0
181	0.536948119447283	Medium	5	residential	0.059701144695282	0.187464237213135	female	female_preg/lact	adult	yes_preg	owned	roaming	entire	healthy	0
182	0.662277538484839	Medium	5	NA	0.0463465452194214	0.173745393753052	male	male	puppy		owned	never roaming	entire	healthy	0
183	0.601637899062296	High	5	residential	0.059701144695282	0.187464237213135	female	female	adult	not_preglact	owned	NA	entire	healthy	0
184	0.97559642812246	Medium	5	residential	0.038285493850708	0.228740394115448	male	male	adult		owned	roaming	entire	healthy	0
185	1.15693623460575	Medium	5	residential	0.038364052772522	0.194374203681946	female	female	adult	not_preglact	owned	roaming	entire	disease	1
186	1.15693623460575	Medium	5	residential	0.038364052772522	0.194374203681946	female	female	adult	not_preglact	owned	roaming	entire	disease	1
187	0.960993597405497	Medium	5	residential	0.038285493850708	0.228740394115448	female	female	adult	not_preglact	owned	roaming	entire	healthy	0
188	0.519940209035487	Low	2	residential	0.0505467057228088	0.20075660943985	female	female_preg/lact	adult	yes_lact	owned	roaming	entire	healthy	0
189	0.858317434268147	Low	5	residential	0.0949823260307312	0.330526471138	male	male	adult		owned	roaming	neutered	healthy	0
190	0.662899160271929	Medium	5	NA	0.0463465452194214	0.173745393753052	male	male	puppy		owned	never roaming	entire	healthy	0
191	0.458852052428087	High	5	residential	0.0620661377906799	0.245069324970245	female	female	adult	unknown_preglact	owned	roaming	entire	unknown_health	1
192	1.1647727140925	Medium	5	residential	0.038364052772522	0.194374203681946	male	male	adult		owned	roaming	entire	disease	1
193	1.1647727140925	Medium	5	residential	0.038364052772522	0.194374203681946	male	male	adult		owned	roaming	entire	disease	1
194	0.313842286879092	High	5	residential	0.0505467057228088	0.20075660943985	male	male	adult		owned	roaming	entire	healthy	1
195	2.51506108438823	Low	3	residential	0.17245876789093	0.45440536737442	male	male	adult		owned	never roaming	entire	healthy	0
196	0.742368467833822	Medium	5	residential	0.0710569620132446	0.23350864648819	male	male	adult		owned	never roaming	entire	healthy	0
197	0.833332960053829	Medium	5	residential	0.0599033832550049	0.266354203224182	female	female	adult	unknown_preglact	owned	roaming	unknown_neuter	unknown_health	0
198	0.662899160271929	Medium	5	NA	0.0463465452194214	0.173745393753052	male	male	puppy		owned	never roaming	entire	healthy	0
199	0.51859853840064	Medium	5	residential	0.0463465452194214	0.173745393753052	female	female	adult	not_preglact	owned	never roaming	entire	healthy	0
200	0.662899160271929	Medium	5	NA	0.0463465452194214	0.173745393753052	male	male	puppy		owned	never roaming	entire	healthy	0
201	0.916733345071959	Low	5	residential	0.0949823260307312	0.330526471138	male	male	adult		owned	roaming	neutered	disease	0
202	1.36629073966836	Medium	5	residential	0.0407703518867493	0.209913432598114	male	male	adult		owned	roaming	entire	healthy	0
203	1.05286911900199	Medium	5	residential	0.0594974160194397	0.233416020870209	male	male	adult		owned	never roaming	entire	healthy	1
204	2.53602405762812	Low	2	residential	0.17245876789093	0.45440536737442	female	female	adult	not_preglact	owned	never roaming	entire	disease	0
205	0.662899160271929	Medium	5	NA	0.0463465452194214	0.173745393753052	male	male	puppy		owned	never roaming	entire	healthy	0
206	0.990815497944686	Medium	5	residential	0.0710222125053406	0.274467587471008	male	male	adult		owned	never roaming	entire	healthy	0
207	0.745475871683479	Medium	5	residential	0.0710569620132446	0.23350864648819	female	female_preg/lact	adult	yes_lact	owned	roaming	entire	healthy	0
208	0.518712680898618	Low	2	residential	0.0505467057228088	0.20075660943985	female	female	puppy	not_preglact	owned	roaming	entire	healthy	0
209	0.915641728395925	Low	5	residential	0.0949823260307312	0.330526471138	male	male	adult		owned	roaming	neutered	healthy	0
210	0.662899160271929	Medium	5	NA	0.0463465452194214	0.173745393753052	male	male	puppy		owned	never roaming	entire	healthy	0
211	2.53419646779114	Low	2	residential	0.17245876789093	0.45440536737442	female	female	adult	not_preglact	owned	never roaming	entire	healthy	0
212	0.445262985360071	Medium	5	residential	0.0710569620132446	0.23350864648819	female	female_preg/lact	adult	yes_preg	owned	roaming	entire	unknown_health	0
213	0.445262985360071	Medium	5	residential	0.0710569620132446	0.23350864648819	female	female_preg/lact	adult	yes_preg	owned	roaming	entire	unknown_health	0
214	0.914415761070535	Low	5	residential	0.0949823260307312	0.330526471138	male	male	adult		owned	roaming	neutered	healthy	0
215	0.662899160271929	Medium	5	NA	0.0463465452194214	0.173745393753052	female	female	puppy	not_preglact	owned	never roaming	entire	healthy	0
216	0.744868655710208	Medium	5	residential	0.0710569620132446	0.23350864648819	male	male	puppy		owned	never roaming	entire	healthy	0
217	0.514340640932079	Low	2	residential	0.0505467057228088	0.20075660943985	female	female	adult	not_preglact	owned	roaming	entire	healthy	0
218	0.662899160271929	Medium	5	NA	0.0463465452194214	0.173745393753052	male	male	puppy		owned	never roaming	entire	healthy	0
219	0.595957988660744	High	5	residential	0.059701144695282	0.187464237213135	male	male	adult		owned	NA	entire	healthy	1
220	0.282777117498168	Medium	5	residential	0.0505467057228088	0.20075660943985	female	female	adult	unknown_preglact	owned	never roaming	entire	healthy	0
221	1.06378502652886	Medium	5	residential	0.0594974160194397	0.233416020870209	female	female	adult	not_preglact	owned	never roaming	entire	healthy	1
222	0.514340640932079	Low	2	residential	0.0505467057228088	0.20075660943985	female	female	puppy	not_preglact	owned	roaming	entire	healthy	0
223	0.84327313944978	Medium	5	residential	0.0599033832550049	0.266354203224182	male	male	adult		owned	roaming	neutered	healthy	1
224	0.512730936810848	High	5	residential	0.059701144695282	0.187464237213135	male	male	adult		owned	roaming	entire	healthy	0
225	0.514340640932079	Low	2	residential	0.0505467057228088	0.20075660943985	male	male	puppy		owned	roaming	entire	healthy	0
226	2.53419646779114	Low	2	residential	0.17245876789093	0.45440536737442	male	male	adult		owned	never roaming	entire	healthy	0
227	1.36652955495694	Medium	5	residential	0.0407703518867493	0.209913432598114	female	female	adult	not_preglact	owned	never roaming	entire	healthy	0
228	0.741978273873985	Medium	5	residential	0.0710569620132446	0.23350864648819	male	male	puppy		owned	never roaming	entire	healthy	0
229	0.514340640932079	Low	2	residential	0.0505467057228088	0.20075660943985	male	male	puppy		owned	roaming	entire	healthy	0
230	0.479445852890472	High	5	residential	0.0620661377906799	0.245069324970245	female	female	puppy	not_preglact	owned	roaming	entire	healthy	1
231	0.568096604564292	Medium	5	residential	0.0463465452194214	0.173745393753052	female	female	adult	not_preglact	owned	never roaming	entire	healthy	0
232	0.913283246217777	Low	5	residential	0.0949823260307312	0.330526471138	male	male	adult		owned	roaming	entire	healthy	1
233	1.3596563393846	Medium	5	residential	0.0407703518867493	0.209913432598114	male	male	adult		owned	never roaming	entire	healthy	0
234	0.262186790284668	High	5	residential	0.0505467057228088	0.20075660943985	male	male	adult		owned	roaming	entire	healthy	1
235	0.514340640932079	Low	2	residential	0.0505467057228088	0.20075660943985	male	male	puppy		owned	roaming	entire	healthy	0
236	1.36000338894876	Medium	5	residential	0.0407703518867493	0.209913432598114	male	male	adult		owned	never roaming	entire	healthy	0
237	0.826265174820341	Medium	5	residential	0.0531797409057617	0.227031588554382	female	female_preg/lact	adult	yes_preg	owned	roaming	entire	healthy	1
238	1.36019669255916	Medium	5	residential	0.0407703518867493	0.209913432598114	female	female	adult	not_preglact	owned	never roaming	entire	healthy	0
239	0.514340640932079	Low	2	residential	0.0505467057228088	0.20075660943985	male	male	puppy		owned	roaming	entire	healthy	0
240	0.827162149616322	Medium	5	residential	0.0531797409057617	0.227031588554382	male	male	adult		owned	roaming	neutered	healthy	1
241	0.736741756277841	Medium	5	residential	0.0710569620132446	0.23350864648819	male	male	puppy		owned	never roaming	entire	healthy	0
242	0.986545126336304	Medium	5	residential	0.038285493850708	0.228740394115448	male	male	adult		owned	roaming	entire	healthy	0
243	1.10948740872403	Medium	5	residential	0.0594974160194397	0.233416020870209	male	male	adult		owned	roaming	entire	healthy	0
244	0.573612107695237	Medium	5	NA	0.0463465452194214	0.173745393753052	female	female	adult	not_preglact	owned	never roaming	entire	healthy	0
245	0.741555761060379	Medium	5	residential	0.0710569620132446	0.23350864648819	male	male	puppy		owned	never roaming	entire	healthy	0
246	0.750661257166782	Medium	5	residential	0.0710222125053406	0.274467587471008	male	male	adult		owned	roaming	entire	healthy	1
247	0.518900854409265	High	5	residential	0.059701144695282	0.187464237213135	male	male	adult		owned	NA	entire	healthy	1
248	0.574486253743812	Medium	5	NA	0.0463465452194214	0.173745393753052	male	male	adult		owned	never roaming	entire	healthy	0
249	0.553600861574738	High	5	residential	0.0620661377906799	0.245069324970245	female	female	puppy	not_preglact	owned	roaming	entire	healthy	1
250	0.44671927348312	Medium	5	residential	0.0710569620132446	0.23350864648819	male	male	adult		stray	NA	entire	healthy	0
251	0.588303072129724	High	5	residential	0.059701144695282	0.187464237213135	male	male	adult		owned	NA	entire	healthy	1
252	0.742333867598434	Medium	5	residential	0.0710569620132446	0.23350864648819	female	female	puppy	not_preglact	owned	never roaming	entire	healthy	0
253	0.553600861574738	High	5	residential	0.0620661377906799	0.245069324970245	female	female	puppy	not_preglact	owned	roaming	entire	healthy	1
254	0.587724924078111	High	5	residential	0.059701144695282	0.187464237213135	female	female	adult	not_preglact	owned	NA	entire	healthy	1
255	0.544842089985555	Medium	5	residential	0.0407751202583313	0.178423881530762	female	female	adult	not_preglact	owned	roaming	entire	unknown_health	1
256	0.742333867598434	Medium	5	residential	0.0710569620132446	0.23350864648819	female	female	puppy	not_preglact	owned	never roaming	entire	healthy	0
257	0.573164845443705	Medium	5	NA	0.0463465452194214	0.173745393753052	male	male	adult		owned	never roaming	entire	disease	0
258	0.553600861574738	High	5	residential	0.0620661377906799	0.245069324970245	female	female_preg/lact	adult	yes_lact	owned	never roaming	entire	disease	1
259	0.743258367028205	Medium	5	residential	0.0710569620132446	0.23350864648819	female	female	puppy	not_preglact	owned	never roaming	entire	healthy	0
260	0.743258367028205	Medium	5	residential	0.0710569620132446	0.23350864648819	female	female	puppy	not_preglact	owned	never roaming	entire	healthy	0
261	0.587724924078111	High	5	residential	0.059701144695282	0.187464237213135	male	male	adult		owned	NA	entire	healthy	1
262	1.10884610841227	Medium	5	residential	0.0594974160194397	0.233416020870209	male	male	adult		owned	roaming	entire	healthy	0
263	0.839118832115943	Medium	5	residential	0.0599033832550049	0.266354203224182	male	male	adult		owned	roaming	entire	healthy	0
264	0.563806348881663	High	5	residential	0.0620661377906799	0.245069324970245	female	female	adult	not_preglact	owned	roaming	entire	disease	1
265	0.542472135107349	Medium	5	residential	0.0407751202583313	0.178423881530762	female	female	adult	not_preglact	owned	roaming	entire	unknown_health	1
266	0.5750246150108	Medium	5	NA	0.0463465452194214	0.173745393753052	male	male	adult		owned	never roaming	entire	healthy	0
267	0.591458620724203	High	5	residential	0.059701144695282	0.187464237213135	male	male	adult		owned	never roaming	entire	healthy	1
268	0.642376775378297	Medium	5	residential	0.0463465452194214	0.173745393753052	male	male	adult		owned	roaming	entire	disease	0
269	0.542472135107349	Medium	5	residential	0.0407751202583313	0.178423881530762	female	female	adult	not_preglact	owned	roaming	unknown_neuter	healthy	0
270	0.5750246150108	Medium	5	NA	0.0463465452194214	0.173745393753052	female	female	adult	not_preglact	owned	never roaming	entire	healthy	0
271	0.262186790284668	High	5	residential	0.0505467057228088	0.20075660943985	male	male	adult		owned	never roaming	entire	healthy	1
272	1.36073870574481	Medium	5	residential	0.0407703518867493	0.209913432598114	male	male	adult		owned	never roaming	entire	healthy	0
273	1.13664284215744	Medium	5	residential	0.038364052772522	0.194374203681946	male	male	adult		owned	roaming	entire	disease	0
274	0.84966881457239	Medium	5	residential	0.0599033832550049	0.266354203224182	male	male	adult		owned	roaming	entire	healthy	0
275	0.743258367028205	Medium	5	residential	0.0710569620132446	0.23350864648819	unknown	unknown	adult		owned	never roaming	unknown_neuter	unknown_health	1
276	0.743258367028205	Medium	5	residential	0.0710569620132446	0.23350864648819	unknown	unknown	adult		owned	never roaming	unknown_neuter	unknown_health	1
277	0.248192290282721	High	5	residential	0.0505467057228088	0.20075660943985	female	female_preg/lact	adult	yes_lact	owned	never roaming	entire	healthy	1
278	0.542666726151989	Medium	5	residential	0.0407751202583313	0.178423881530762	male	male	adult		owned	roaming	unknown_neuter	unknown_health	0
279	0.564851993607342	High	5	residential	0.0620661377906799	0.245069324970245	male	male	adult		owned	never roaming	entire	healthy	1
280	1.38474154427833	Medium	5	residential	0.0407703518867493	0.209913432598114	male	male	adult		owned	never roaming	entire	healthy	0
281	0.248192290282721	High	5	residential	0.0505467057228088	0.20075660943985	unknown	unknown	puppy		owned	never roaming	entire	unknown_health	1
282	0.477832582229797	Medium	5	residential	0.0710569620132446	0.23350864648819	male	male	adult		owned	roaming	entire	healthy	1
283	0.741520231888655	Medium	5	residential	0.0710569620132446	0.23350864648819	unknown	unknown	adult		owned	NA	unknown_neuter	unknown_health	1
284	0.983318229312773	Low	5	residential	0.0949823260307312	0.330526471138	male	male	adult		owned	roaming	entire	healthy	1
285	0.990516186404947	Medium	5	residential	0.0710222125053406	0.274467587471008	female	female_preg/lact	adult	yes_lact	owned	never roaming	entire	healthy	0
286	0.983318229312773	Low	5	residential	0.0949823260307312	0.330526471138	male	male	puppy		owned	roaming	entire	healthy	1
287	0.477813660710753	Medium	5	residential	0.0710569620132446	0.23350864648819	male	male	adult		owned	roaming	entire	unknown_health	1
288	2.56427207234484	Low	2	residential	0.17245876789093	0.45440536737442	male	male	puppy		owned	roaming	entire	healthy	1
289	0.632526032771262	Medium	5	residential	0.0463465452194214	0.173745393753052	male	male	adult		owned	roaming	entire	disease	0
290	0.573599230216318	High	5	residential	0.0620661377906799	0.245069324970245	male	male	adult		owned	roaming	entire	disease	1
291	0.248377393804948	High	5	residential	0.0505467057228088	0.20075660943985	unknown	unknown	puppy		owned	never roaming	entire	unknown_health	1
292	1.11462895033178	Medium	5	residential	0.0594974160194397	0.233416020870209	female	female	adult	not_preglact	owned	roaming	entire	healthy	0
293	0.477813660710753	Medium	5	residential	0.0710569620132446	0.23350864648819	female	female	adult	not_preglact	owned	roaming	entire	unknown_health	1
294	0.538675026327647	High	5	residential	0.059701144695282	0.187464237213135	male	male	puppy		owned	NA	entire	healthy	0
295	0.248377393804948	High	5	residential	0.0505467057228088	0.20075660943985	unknown	unknown	puppy		owned	never roaming	entire	unknown_health	1
296	0.537104610348457	High	5	residential	0.059701144695282	0.187464237213135	male	male	puppy		owned	NA	entire	healthy	0
297	0.248377393804948	High	5	residential	0.0505467057228088	0.20075660943985	unknown	unknown	puppy		owned	never roaming	entire	unknown_health	1
298	0.988369852034995	Medium	5	residential	0.0710222125053406	0.274467587471008	female	female	adult	not_preglact	owned	never roaming	entire	healthy	0
299	0.789378062880611	Medium	5	residential	0.0710569620132446	0.23350864648819	male	male	adult		owned	never roaming	entire	healthy	0
300	0.248377393804948	High	5	residential	0.0505467057228088	0.20075660943985	unknown	unknown	puppy		owned	never roaming	entire	unknown_health	1
301	0.578335042727876	High	5	residential	0.0620661377906799	0.245069324970245	male	male	adult		owned	never roaming	entire	healthy	1
302	2.53508348184828	Low	3	residential	0.162043690681458	0.441577434539795	male	male	adult		owned	roaming	entire	healthy	1
303	1.45703655078482	Medium	5	residential	0.0407703518867493	0.209913432598114	female	female	adult	not_preglact	owned	never roaming	entire	healthy	0
304	2.53508348184828	Low	3	residential	0.162043690681458	0.441577434539795	male	male	adult		owned	roaming	entire	healthy	1
305	2.53508348184828	Low	3	residential	0.162043690681458	0.441577434539795	female	female	puppy	not_preglact	owned	roaming	entire	healthy	1
306	0.579444320218503	High	5	residential	0.0620661377906799	0.245069324970245	female	female	adult	not_preglact	owned	never roaming	entire	healthy	1
307	2.53508348184828	Low	3	residential	0.162043690681458	0.441577434539795	female	female	adult	not_preglact	owned	roaming	entire	healthy	1
308	0.988520512231798	Medium	5	residential	0.0710222125053406	0.274467587471008	male	male	adult		owned	never roaming	entire	healthy	0
309	0.547463517199764	High	5	residential	0.059701144695282	0.187464237213135	female	female	adult	not_preglact	owned	NA	entire	healthy	0
310	2.53508348184828	Low	3	residential	0.162043690681458	0.441577434539795	female	female	adult	unknown_preglact	owned	roaming	unknown_neuter	unknown_health	1
311	0.789308752777492	Medium	5	residential	0.0710569620132446	0.23350864648819	female	female	adult	not_preglact	owned	never roaming	entire	healthy	0
312	0.983318229312773	Low	5	residential	0.0949823260307312	0.330526471138	unknown	unknown	adult		owned	roaming	unknown_neuter	unknown_health	0
313	2.53508348184828	Low	3	residential	0.162043690681458	0.441577434539795	female	female	adult	unknown_preglact	owned	roaming	unknown_neuter	unknown_health	1
314	0.544996091052417	High	5	residential	0.059701144695282	0.187464237213135	female	female	adult	not_preglact	owned	NA	entire	healthy	0
315	2.53508348184828	Low	3	residential	0.162043690681458	0.441577434539795	female	female	adult	unknown_preglact	owned	roaming	unknown_neuter	unknown_health	1
316	0.497718219455022	Medium	5	residential	0.0407751202583313	0.178423881530762	male	male	adult		owned	roaming	neutered	healthy	0
317	0.544295296408541	High	5	residential	0.059701144695282	0.187464237213135	male	male	adult		owned	NA	entire	healthy	0
318	0.948038311100589	Low	5	residential	0.0949823260307312	0.330526471138	female	female	adult	unknown_preglact	owned	roaming	unknown_neuter	unknown_health	0
319	0.817674090859274	Medium	5	residential	0.0531797409057617	0.227031588554382	female	female	adult	not_preglact	owned	roaming	entire	healthy	0
320	2.53508348184828	Low	3	residential	0.162043690681458	0.441577434539795	female	female	adult	not_preglact	owned	roaming	entire	unknown_health	1
321	0.477813660710753	Medium	5	residential	0.0710569620132446	0.23350864648819	male	male	adult		owned	roaming	entire	healthy	1
322	2.50865060723012	Low	3	residential	0.162043690681458	0.441577434539795	female	female	adult	unknown_preglact	owned	roaming	entire	unknown_health	1
323	0.544133369842367	High	5	residential	0.059701144695282	0.187464237213135	female	female	adult	not_preglact	owned	never roaming	entire	healthy	0
324	0.93068502474386	Low	5	residential	0.0949823260307312	0.330526471138	female	female	puppy	not_preglact	owned	roaming	entire	healthy	1
325	0.579454483805592	High	5	residential	0.0620661377906799	0.245069324970245	female	female_preg/lact	adult	yes_lact	owned	roaming	entire	healthy	1
326	2.47707813983044	Low	3	residential	0.162043690681458	0.441577434539795	female	female	adult	unknown_preglact	owned	roaming	entire	unknown_health	1
327	0.988696587936193	Medium	5	residential	0.0710222125053406	0.274467587471008	male	male	adult		owned	never roaming	entire	disease	0
328	0.931041512571446	Low	5	residential	0.0949823260307312	0.330526471138	female	female	puppy	not_preglact	owned	roaming	entire	healthy	1
329	0.577000917218964	High	5	residential	0.0620661377906799	0.245069324970245	female	female	puppy	not_preglact	owned	roaming	entire	healthy	1
330	0.578436473194759	High	5	residential	0.0620661377906799	0.245069324970245	male	male	puppy		owned	roaming	entire	healthy	1
331	0.634682922642213	Medium	5	residential	0.0463465452194214	0.173745393753052	male	male	adult		owned	never roaming	entire	disease	0
332	0.597451211548506	High	5	residential	0.059701144695282	0.187464237213135	female	female	adult	not_preglact	owned	roaming	entire	healthy	0
333	0.580460018813765	High	5	residential	0.0620661377906799	0.245069324970245	male	male	puppy		owned	roaming	entire	healthy	1
334	1.4864721808071	Medium	5	NA	0.0407703518867493	0.209913432598114	male	male	adult		owned	never roaming	neutered	healthy	0
335	0.934879925378147	Low	5	residential	0.0949823260307312	0.330526471138	female	female	adult	not_preglact	owned	roaming	entire	healthy	0
336	1.2048227360215	Low	5	residential	0.038364052772522	0.194374203681946	female	female	adult	not_preglact	owned	roaming	entire	healthy	0
337	0.621820931908026	Medium	5	residential	0.0463465452194214	0.173745393753052	female	female	adult	not_preglact	owned	never roaming	entire	healthy	0
338	0.940118652878909	Low	5	residential	0.0949823260307312	0.330526471138	male	male	adult		owned	roaming	entire	healthy	0
339	0.939084356871925	Low	5	residential	0.0949823260307312	0.330526471138	male	male	adult		owned	roaming	entire	healthy	0
340	0.466850942809137	Medium	5	residential	0.0710569620132446	0.23350864648819	male	male	adult		owned	roaming	entire	healthy	1
341	0.597230153330396	High	5	residential	0.059701144695282	0.187464237213135	male	male	adult		owned	NA	entire	healthy	0
342	0.941033324939556	Low	5	residential	0.0949823260307312	0.330526471138	male	male	adult		owned	roaming	entire	healthy	0
343	0.466850942809137	Medium	5	residential	0.0710569620132446	0.23350864648819	female	female	adult	not_preglact	owned	roaming	entire	healthy	0
344	2.33783886786746	Low	3	residential	0.162043690681458	0.441577434539795	male	male	adult		owned	NA	entire	healthy	0
345	0.930973961546912	Medium	5	residential	0.0710569620132446	0.23350864648819	male	male	adult		owned	never roaming	entire	healthy	0
346	0.54608100256461	High	5	residential	0.059701144695282	0.187464237213135	male	male	adult		owned	never roaming	neutered	healthy	0
347	2.34499060578339	Low	3	residential	0.162043690681458	0.441577434539795	female	female_preg/lact	adult	yes_lact	owned	roaming	entire	healthy	0
348	0.79134794410393	Medium	5	residential	0.0710569620132446	0.23350864648819	male	male	adult		owned	never roaming	entire	healthy	1
349	0.274592421985815	High	5	residential	0.0505467057228088	0.20075660943985	female	female	adult	not_preglact	owned	never roaming	entire	healthy	1
350	2.35472408076128	Low	3	residential	0.162043690681458	0.441577434539795	female	female	puppy	not_preglact	owned	roaming	entire	disease	0
351	0.930438195017985	Medium	5	residential	0.0710569620132446	0.23350864648819	male	male	adult		owned	never roaming	entire	healthy	0
352	0.621631636377575	Medium	5	residential	0.0463465452194214	0.173745393753052	male	male	adult		owned	never roaming	neutered	healthy	0
353	0.791446487384644	Medium	5	residential	0.0710569620132446	0.23350864648819	male	male	puppy		owned	never roaming	entire	healthy	0
354	1.20771333570529	Medium	5	residential	0.038364052772522	0.194374203681946	female	female	adult	not_preglact	owned	never roaming	entire	healthy	1
355	0.605392619840162	High	5	residential	0.0620661377906799	0.245069324970245	female	female	adult	not_preglact	owned	roaming	entire	disease	1
356	0.597753892072938	Medium	5	residential	0.0463465452194214	0.173745393753052	male	male	adult		owned	roaming	neutered	healthy	1
357	0.621631636377575	Medium	5	residential	0.0463465452194214	0.173745393753052	male	male	adult		owned	never roaming	neutered	healthy	0
358	0.994684329452459	Medium	5	residential	0.0710222125053406	0.274467587471008	male	male	adult		owned	never roaming	entire	healthy	0
359	0.278177912184015	High	5	residential	0.0505467057228088	0.20075660943985	male	male	adult		owned	never roaming	entire	healthy	1
360	0.621631636377575	Medium	5	residential	0.0463465452194214	0.173745393753052	male	male	adult		owned	never roaming	neutered	healthy	0
361	0.977979914108265	Low	5	residential	0.129744291305542	0.400284826755524	male	male	adult		owned	roaming	entire	healthy	1
362	2.35278891580902	Low	3	residential	0.162043690681458	0.441577434539795	male	male	puppy		owned	roaming	entire	healthy	0
363	1.46415344304875	Medium	5	residential	0.0407703518867493	0.209913432598114	male	male	adult		owned	never roaming	entire	disease	0
364	0.787931652518024	Medium	5	residential	0.0710569620132446	0.23350864648819	male	male	adult		owned	never roaming	entire	disease	1
365	1.2086971584734	Medium	5	residential	0.038364052772522	0.194374203681946	male	male	adult		owned	never roaming	entire	healthy	1
366	0.97803751974489	Low	5	residential	0.129744291305542	0.400284826755524	male	male	adult		owned	roaming	entire	healthy	1
367	0.850777218352913	Medium	5	residential	0.038285493850708	0.228740394115448	female	female	adult	not_preglact	owned	roaming	entire	healthy	0
368	0.726975278042182	Medium	5	residential	0.0710222125053406	0.274467587471008	female	female	puppy	not_preglact	owned	roaming	entire	healthy	0
369	0.938656897226	Low	5	residential	0.0710569620132446	0.23350864648819	female	female	adult	not_preglact	owned	never roaming	entire	disease	0
370	0.582898707095138	High	5	residential	0.0620661377906799	0.245069324970245	male	male	adult		owned	never roaming	entire	disease	0
371	0.850777218352913	Medium	5	residential	0.038285493850708	0.228740394115448	female	female	adult	not_preglact	owned	roaming	neutered	healthy	0
372	0.983022139365595	Medium	5	residential	0.11014312505722	0.314207196235657	male	male	adult		owned	never roaming	entire	healthy	0
373	0.847356280985282	Medium	5	residential	0.038285493850708	0.228740394115448	male	male	puppy		owned	roaming	entire	healthy	0
374	1.00275655620041	Low	5	residential	0.129744291305542	0.400284826755524	male	male	adult		owned	roaming	entire	healthy	1
375	0.0744745349189522	High	5	residential	0.0505467057228088	0.20075660943985	female	female	adult	not_preglact	owned	roaming	entire	healthy	0
376	2.29921192853193	Low	3	residential	0.162043690681458	0.441577434539795	female	female	adult	not_preglact	owned	roaming	entire	healthy	0
377	0.991352197432539	Medium	5	residential	0.0710222125053406	0.274467587471008	female	female	adult	not_preglact	owned	never roaming	entire	healthy	0
378	1.05218359825169	Low	5	residential	0.129744291305542	0.400284826755524	female	female	adult	not_preglact	owned	roaming	entire	healthy	1
379	0.847356280985282	Medium	5	residential	0.038285493850708	0.228740394115448	male	male	adult		owned	roaming	entire	healthy	0
380	0.805577086879787	Medium	5	residential	0.0710569620132446	0.23350864648819	male	male	adult		owned	roaming	entire	healthy	0
381	0.854455736116653	Medium	5	residential	0.038285493850708	0.228740394115448	female	female	adult	not_preglact	owned	roaming	entire	healthy	0
382	0.0746609439663047	High	5	residential	0.0505467057228088	0.20075660943985	female	female	adult	not_preglact	owned	roaming	entire	healthy	0
383	0.537483609747103	High	5	residential	0.059701144695282	0.187464237213135	male	male	adult		owned	never roaming	entire	healthy	0
384	1.14233162400348	Medium	5	residential	0.038364052772522	0.194374203681946	male	male	adult		owned	never roaming	neutered	healthy	1
385	1.14233162400348	Medium	5	residential	0.038364052772522	0.194374203681946	male	male	adult		owned	never roaming	neutered	healthy	1
386	0.562018836342823	High	5	residential	0.0620661377906799	0.245069324970245	male	male	adult		owned	never roaming	entire	healthy	0
387	0.854455736116653	Medium	5	residential	0.038285493850708	0.228740394115448	male	male	adult		owned	roaming	entire	healthy	0
388	1.04748796724691	Low	5	residential	0.129744291305542	0.400284826755524	male	male	adult		owned	roaming	entire	healthy	0
389	0.889320979599166	Medium	5	residential	0.0531797409057617	0.227031588554382	female	female_preg/lact	adult	yes_lact	owned	roaming	entire	healthy	0
390	0.481624248362654	High	5	residential	0.059701144695282	0.187464237213135	female	female	adult	not_preglact	owned	never roaming	entire	disease	0
391	0.562018836342823	High	5	residential	0.0620661377906799	0.245069324970245	male	male	adult		owned	never roaming	entire	healthy	0
392	0.726975278042182	Medium	5	residential	0.0710222125053406	0.274467587471008	male	male	adult		owned	never roaming	entire	healthy	0
393	0.855204813683544	Medium	5	residential	0.038285493850708	0.228740394115448	male	male	adult		owned	roaming	entire	healthy	0
394	1.13198471962536	Medium	5	residential	0.038364052772522	0.194374203681946	male	male	adult		owned	never roaming	entire	healthy	1
395	0.481624248362654	High	5	residential	0.059701144695282	0.187464237213135	male	male	adult		owned	never roaming	entire	healthy	0
396	0.953567129161533	Medium	5	residential	0.0594974160194397	0.233416020870209	male	male	puppy		owned	never roaming	entire	healthy	0
397	0.855204813683544	Medium	5	residential	0.038285493850708	0.228740394115448	female	female	adult	not_preglact	owned	roaming	entire	healthy	0
398	1.13157124551321	Medium	5	residential	0.038364052772522	0.194374203681946	female	female	adult	not_preglact	owned	never roaming	entire	healthy	1
399	0.941023579195263	Low	5	residential	0.0710569620132446	0.23350864648819	female	female_preg/lact	adult	yes_lact	owned	never roaming	entire	healthy	0
400	0.941023579195263	Low	5	residential	0.0710569620132446	0.23350864648819	female	female_preg/lact	adult	yes_lact	owned	never roaming	entire	healthy	0
401	0.481624248362654	High	5	residential	0.059701144695282	0.187464237213135	male	male	adult		owned	never roaming	entire	healthy	0
402	0.609266347747844	Medium	5	residential	0.0463465452194214	0.173745393753052	male	male	adult		owned	never roaming	entire	healthy	0
403	0.520242556497769	Medium	5	residential	0.0710569620132446	0.23350864648819	female	female_preg/lact	adult	yes_preg	owned	roaming	entire	healthy	1
404	0.646874529278537	High	5	residential	0.059701144695282	0.187464237213135	female	female_preg/lact	adult	yes_preg	owned	NA	entire	healthy	0
405	0.990360906191665	Medium	5	residential	0.0710222125053406	0.274467587471008	male	male	adult		owned	never roaming	entire	healthy	0
406	0.617912188611899	High	5	residential	0.0620661377906799	0.245069324970245	male	male	adult		owned	never roaming	entire	healthy	0
407	0.93195947022911	Medium	5	residential	0.0531797409057617	0.227031588554382	male	male	puppy		owned	never roaming	entire	healthy	0
408	1.19915748029193	Medium	5	residential	0.0407703518867493	0.209913432598114	male	male	adult		owned	never roaming	neutered	healthy	0
409	0.93195947022911	Medium	5	residential	0.0531797409057617	0.227031588554382	female	female	adult	not_preglact	owned	never roaming	entire	healthy	0
410	0.60930458984991	Medium	5	residential	0.0463465452194214	0.173745393753052	female	female	adult	not_preglact	owned	never roaming	entire	disease	0
411	1.04732260609908	Low	5	residential	0.129744291305542	0.400284826755524	male	male	adult		owned	roaming	entire	healthy	0
412	0.99177694307243	Medium	5	residential	0.0710222125053406	0.274467587471008	female	female	adult	not_preglact	owned	never roaming	entire	healthy	0
413	2.21854683603916	Low	3	residential	0.162043690681458	0.441577434539795	female	female	adult	not_preglact	owned	never roaming	entire	healthy	0
414	0.95605475765055	Medium	5	residential	0.0594974160194397	0.233416020870209	female	female	adult	not_preglact	owned	never roaming	entire	healthy	0
415	0.61700765393353	High	5	residential	0.0620661377906799	0.245069324970245	male	male	adult		owned	never roaming	entire	healthy	0
416	0.951135561581274	Low	5	residential	0.0710569620132446	0.23350864648819	male	male	puppy		owned	never roaming	entire	disease	0
417	1.86279719525143	Low	5	residential	0.129744291305542	0.400284826755524	female	female	adult	not_preglact	owned	roaming	entire	healthy	0
418	1.86279719525143	Low	5	residential	0.129744291305542	0.400284826755524	female	female	adult	not_preglact	owned	roaming	entire	healthy	0
419	0.93195947022911	Medium	5	residential	0.0531797409057617	0.227031588554382	female	female	adult	not_preglact	owned	never roaming	entire	healthy	0
420	1.15183692185892	Medium	5	residential	0.0407703518867493	0.209913432598114	male	male	adult		owned	never roaming	neutered	healthy	0
421	0.93195947022911	Medium	5	residential	0.0531797409057617	0.227031588554382	female	female	puppy	not_preglact	owned	never roaming	entire	healthy	0
422	0.950573975474872	Low	5	residential	0.0710569620132446	0.23350864648819	female	female	puppy	not_preglact	owned	never roaming	entire	disease	0
423	1.1430115770612	Low	5	residential	0.129744291305542	0.400284826755524	female	female	adult	not_preglact	owned	roaming	entire	healthy	0
424	0.897207385037243	Medium	5	residential	0.0463465452194214	0.173745393753052	male	male	adult		owned	roaming	entire	disease	0
425	0.93155344491042	Medium	5	residential	0.0531797409057617	0.227031588554382	male	male	adult		owned	never roaming	entire	healthy	0
426	0.949552579978305	Medium	5	residential	0.0594974160194397	0.233416020870209	female	female	adult	not_preglact	owned	never roaming	entire	healthy	0
427	1.15149086991795	Medium	5	residential	0.0407703518867493	0.209913432598114	female	female	adult	not_preglact	owned	never roaming	entire	healthy	0
428	0.859595609748202	Medium	5	residential	0.038285493850708	0.228740394115448	female	female	adult	not_preglact	owned	never roaming	entire	healthy	1
429	1.15435369456006	Medium	5	residential	0.0407703518867493	0.209913432598114	female	female	adult	not_preglact	owned	never roaming	entire	healthy	0
430	2.20370896382145	Low	3	residential	0.162043690681458	0.441577434539795	male	male	adult		owned	roaming	entire	disease	0
431	0.93155344491042	Medium	5	residential	0.0531797409057617	0.227031588554382	male	male	puppy		owned	never roaming	entire	healthy	0
432	0.991506161514425	Medium	5	residential	0.0710222125053406	0.274467587471008	female	female	adult	not_preglact	owned	never roaming	entire	healthy	0
433	0.711642557581998	Medium	5	residential	0.0710222125053406	0.274467587471008	male	male	adult		owned	never roaming	entire	healthy	1
434	0.843707542920485	Medium	5	residential	0.038285493850708	0.228740394115448	male	male	adult		owned	roaming	entire	healthy	1
435	0.93155344491042	Medium	5	residential	0.0531797409057617	0.227031588554382	male	male	puppy		owned	never roaming	entire	healthy	0
436	2.15603888998495	Low	3	residential	0.162043690681458	0.441577434539795	male	male	adult		owned	roaming	entire	disease	0
437	0.900329462498026	Medium	5	residential	0.0463465452194214	0.173745393753052	male	male	adult		owned	roaming	entire	disease	0
438	0.950573975474872	Low	5	residential	0.0710569620132446	0.23350864648819	male	male	adult		owned	never roaming	entire	healthy	0
439	0.482635061633195	High	5	residential	0.059701144695282	0.187464237213135	female	female_preg/lact	adult	yes_lact	owned	NA	entire	healthy	0
440	1.14638861324219	Low	5	residential	0.129744291305542	0.400284826755524	female	female	adult	not_preglact	owned	roaming	entire	healthy	0
441	0.983022139365595	Medium	5	residential	0.11014312505722	0.314207196235657	male	male	adult		owned	never roaming	entire	healthy	0
442	1.14852046799491	Low	5	residential	0.129744291305542	0.400284826755524	female	female	adult	not_preglact	owned	roaming	entire	healthy	0
443	0.614665161824727	Medium	5	residential	0.0463465452194214	0.173745393753052	male	male	adult		owned	never roaming	unknown_neuter	unknown_health	1
444	0.891544681445157	Medium	5	residential	0.0710569620132446	0.23350864648819	male	male	adult		owned	never roaming	neutered	healthy	0
445	0.788267599933744	Medium	5	residential	0.038285493850708	0.228740394115448	male	male	adult		owned	roaming	entire	healthy	1
446	0.64185465374008	High	5	residential	0.059701144695282	0.187464237213135	male	male	puppy		owned	NA	entire	healthy	1
447	0.788503183492135	Medium	5	residential	0.038285493850708	0.228740394115448	female	female	adult	not_preglact	owned	roaming	entire	healthy	1
448	0.891544681445157	Medium	5	residential	0.0710569620132446	0.23350864648819	male	male	adult		owned	never roaming	neutered	healthy	0
449	0.546877725003575	High	5	residential	0.0459426641464233	0.185511410236359	female	female_preg/lact	adult	yes_preg	owned	roaming	entire	healthy	0
450	0.93155344491042	Medium	5	residential	0.0531797409057617	0.227031588554382	female	female	adult	not_preglact	owned	roaming	entire	healthy	1
451	0.542377710305266	High	5	residential	0.0620661377906799	0.245069324970245	male	male	adult		owned	roaming	entire	healthy	1
452	0.481837986942879	Medium	5	residential	0.0463465452194214	0.173745393753052	male	male	adult		owned	never roaming	entire	healthy	1
453	1.14774382916518	Low	5	residential	0.129744291305542	0.400284826755524	female	female	adult	not_preglact	owned	roaming	entire	healthy	0
454	0.99167743105964	Medium	5	residential	0.0710222125053406	0.274467587471008	female	female	puppy	not_preglact	owned	never roaming	entire	healthy	0
455	0.550748484911922	High	5	residential	0.0620661377906799	0.245069324970245	male	male	adult		owned	roaming	entire	healthy	0
456	0.965741712701151	Medium	5	residential	0.0531797409057617	0.227031588554382	male	male	adult		owned	roaming	entire	healthy	1
457	1.05210639626279	Medium	5	residential	0.0531797409057617	0.227031588554382	male	male	adult		owned	never roaming	entire	healthy	0
458	0.477970220195205	Medium	5	residential	0.0463465452194214	0.173745393753052	female	female	adult	not_preglact	owned	never roaming	neutered	healthy	1
459	1.04228736190564	Medium	5	residential	0.0531797409057617	0.227031588554382	male	male	adult		owned	never roaming	entire	healthy	0
460	0.644320957914566	Medium	5	residential	0.0463465452194214	0.173745393753052	male	male	adult		owned	never roaming	unknown_neuter	unknown_health	1
461	0.345296209436425	Medium	5	NA	0.0505467057228088	0.20075660943985	male	male	adult		owned	never roaming	unknown_neuter	unknown_health	1
462	0.990796302080413	Medium	5	residential	0.0710222125053406	0.274467587471008	female	female	adult	not_preglact	owned	never roaming	entire	healthy	0
463	0.698772240040079	Medium	5	residential	0.0710222125053406	0.274467587471008	female	female_preg/lact	adult	yes_preg	owned	never roaming	entire	healthy	0
464	0.891544681445157	Medium	5	residential	0.0710569620132446	0.23350864648819	unknown	unknown	adult		owned	never roaming	unknown_neuter	unknown_health	1
465	0.560788403160479	High	5	residential	0.0620661377906799	0.245069324970245	female	female	adult	not_preglact	owned	roaming	entire	healthy	0
466	1.12042242220695	Low	5	residential	0.129744291305542	0.400284826755524	female	female	adult	not_preglact	owned	roaming	entire	unknown_health	0
467	0.345621331576019	Medium	5	NA	0.0505467057228088	0.20075660943985	female	female	adult	not_preglact	owned	never roaming	entire	healthy	1
468	0.726975278042182	Medium	5	residential	0.0710222125053406	0.274467587471008	female	female	adult	not_preglact	owned	never roaming	entire	healthy	0
469	1.84561289904673	Low	5	residential	0.129744291305542	0.400284826755524	female	female	adult	not_preglact	owned	roaming	entire	healthy	0
470	1.15290316563227	Low	5	residential	0.2109414935112	0.512921690940857	female	female	adult	not_preglact	owned	roaming	entire	unknown_health	0
471	0.937201075177184	Medium	5	residential	0.0710569620132446	0.23350864648819	female	female	adult	not_preglact	owned	never roaming	entire	healthy	0
472	0.937201075177184	Medium	5	residential	0.0710569620132446	0.23350864648819	female	female	adult	not_preglact	owned	never roaming	entire	healthy	0
473	0.779848313777604	Medium	5	residential	0.0710222125053406	0.274467587471008	female	female	adult	not_preglact	owned	never roaming	entire	healthy	0
474	0.991773586588326	Medium	5	residential	0.0710222125053406	0.274467587471008	female	female_preg/lact	adult	yes_lact	owned	never roaming	entire	healthy	0
475	0.491031005498232	High	5	residential	0.059701144695282	0.187464237213135	male	male	adult		owned	NA	entire	healthy	0
476	0.560413977983406	High	5	residential	0.0620661377906799	0.245069324970245	male	male	adult		owned	never roaming	entire	healthy	1
477	0.867453351934949	Medium	5	residential	0.0463465452194214	0.173745393753052	male	male	adult		owned	NA	entire	disease	0
478	1.15188246064183	Low	5	residential	0.2109414935112	0.512921690940857	male	male	adult		owned	roaming	entire	healthy	1
479	0.966928641351626	Medium	5	residential	0.0710569620132446	0.23350864648819	male	male	adult		owned	never roaming	entire	healthy	0
480	0.943695102907974	Medium	5	residential	0.0594974160194397	0.233416020870209	female	female	adult	not_preglact	owned	never roaming	entire	healthy	0
481	0.549314874700195	High	5	residential	0.0459426641464233	0.185511410236359	male	male	adult		owned	roaming	entire	healthy	1
482	1.84496369213695	Low	5	residential	0.129744291305542	0.400284826755524	male	male	adult		owned	roaming	entire	healthy	0
483	0.580050857449727	High	5	residential	0.0620661377906799	0.245069324970245	male	male	adult		owned	roaming	entire	healthy	0
484	0.867080532948986	Medium	5	residential	0.0463465452194214	0.173745393753052	male	male	adult		owned	NA	entire	healthy	0
485	0.991198552259664	Medium	5	residential	0.0710222125053406	0.274467587471008	female	female	adult	not_preglact	owned	roaming	entire	healthy	0
486	1.84582713817978	Low	5	residential	0.129744291305542	0.400284826755524	female	female	adult	not_preglact	owned	roaming	entire	healthy	0
487	0.866487536616468	Medium	5	residential	0.0463465452194214	0.173745393753052	male	male	adult		owned	roaming	entire	healthy	0
488	1.20154231309697	Low	5	residential	0.2109414935112	0.512921690940857	female	female	adult	not_preglact	owned	roaming	entire	healthy	1
489	1.84582713817978	Low	5	residential	0.129744291305542	0.400284826755524	male	male	puppy		owned	roaming	entire	healthy	0
490	1.20227907872394	Low	5	residential	0.2109414935112	0.512921690940857	male	male	adult		owned	roaming	entire	healthy	1
491	0.938541453571439	Medium	5	residential	0.0594974160194397	0.233416020870209	female	female	adult	not_preglact	owned	never roaming	entire	healthy	0
492	0.865803125234989	Medium	5	residential	0.0463465452194214	0.173745393753052	female	female_preg/lact	adult	yes_preg	owned	NA	entire	healthy	0
493	0.644411566991345	Medium	5	residential	0.0463465452194214	0.173745393753052	male	male	adult		owned	never roaming	unknown_neuter	healthy	0
494	0.865803125234989	Medium	5	residential	0.0463465452194214	0.173745393753052	female	female	adult	not_preglact	owned	NA	entire	healthy	0
495	1.97772275961146	Low	3	residential	0.162043690681458	0.441577434539795	male	male	adult		owned	never roaming	entire	healthy	0
496	0.991983804541695	Medium	5	residential	0.0710222125053406	0.274467587471008	female	female	puppy	not_preglact	owned	roaming	entire	healthy	0
497	0.484108427843743	Medium	5	residential	0.0463465452194214	0.173745393753052	female	female_preg/lact	adult	yes_lact	owned	never roaming	entire	disease	1
498	0.56569178405873	Medium	5	residential	0.0463465452194214	0.173745393753052	female	female	adult	not_preglact	owned	never roaming	entire	healthy	0
499	0.865465577937074	Medium	5	residential	0.0463465452194214	0.173745393753052	female	female	adult	not_preglact	owned	roaming	entire	healthy	0
500	0.992013906534152	Medium	5	residential	0.0710222125053406	0.274467587471008	female	female	adult	not_preglact	owned	never roaming	neutered	healthy	0
501	0.582319735662333	Medium	5	residential	0.0710569620132446	0.23350864648819	female	female	adult	not_preglact	owned	roaming	neutered	healthy	1
502	1.07917636742527	Medium	5	residential	0.038364052772522	0.194374203681946	female	female_preg/lact	adult	yes_preg	owned	never roaming	entire	healthy	0
503	0.567643615841483	Medium	5	residential	0.0463465452194214	0.173745393753052	female	female	adult	not_preglact	owned	never roaming	entire	healthy	0
504	0.867906867597902	Medium	5	residential	0.0463465452194214	0.173745393753052	female	female_preg/lact	adult	yes_lact	owned	NA	entire	healthy	0
505	0.534047394155615	High	5	residential	0.0459426641464233	0.185511410236359	female	female	adult	unknown_preglact	owned	roaming	entire	healthy	0
506	0.456078913639779	Medium	5	residential	0.0463465452194214	0.173745393753052	male	male	adult		owned	never roaming	entire	healthy	1
507	0.562912500382371	Medium	5	residential	0.0463465452194214	0.173745393753052	male	male	adult		owned	roaming	entire	healthy	0
508	1.95077848965544	Low	3	residential	0.162043690681458	0.441577434539795	male	male	adult		owned	never roaming	entire	healthy	0
509	0.490473871000041	High	5	residential	0.059701144695282	0.187464237213135	unknown	unknown	adult		owned	NA	unknown_neuter	unknown_health	1
510	0.991319733975161	Medium	5	residential	0.0710222125053406	0.274467587471008	male	male	adult		owned	never roaming	neutered	healthy	0
511	0.579082756725834	High	5	residential	0.0620661377906799	0.245069324970245	male	male	adult		owned	never roaming	entire	healthy	0
512	0.868029188626008	Medium	5	residential	0.0463465452194214	0.173745393753052	female	female	puppy	not_preglact	owned	NA	entire	unknown_health	1
513	1.94322744675988	Low	3	residential	0.162043690681458	0.441577434539795	male	male	adult		owned	never roaming	entire	healthy	0
514	0.975598540258696	Medium	5	residential	0.0710569620132446	0.23350864648819	female	female_preg/lact	adult	yes_lact	owned	never roaming	entire	healthy	1
515	0.563644845785445	Medium	5	residential	0.0463465452194214	0.173745393753052	female	female	adult	not_preglact	owned	roaming	entire	healthy	0
516	0.551992094817221	High	5	residential	0.059701144695282	0.187464237213135	female	female	adult	unknown_preglact	owned	NA	entire	disease	0
517	0.653193829575533	High	5	residential	0.0620661377906799	0.245069324970245	male	male	adult		owned	never roaming	entire	healthy	0
518	0.548059260053488	High	5	residential	0.0459426641464233	0.185511410236359	female	female	adult	unknown_preglact	owned	roaming	entire	healthy	0
519	0.991480223850011	Medium	5	residential	0.0710222125053406	0.274467587471008	male	male	adult		owned	never roaming	neutered	healthy	0
520	0.456118153029882	Medium	5	residential	0.0463465452194214	0.173745393753052	male	male	puppy		owned	never roaming	entire	healthy	0
521	0.774693837041051	Medium	5	residential	0.038285493850708	0.228740394115448	male	male	adult		owned	roaming	neutered	healthy	1
522	1.21777838375246	Low	5	residential	0.129744291305542	0.400284826755524	male	male	adult		owned	roaming	entire	healthy	0
523	0.45720592985497	Medium	5	residential	0.0463465452194214	0.173745393753052	female	female	puppy	not_preglact	owned	never roaming	entire	healthy	0
524	0.991828058408213	Medium	5	residential	0.0710222125053406	0.274467587471008	female	female	adult	not_preglact	owned	never roaming	entire	healthy	0
525	0.694354288766383	High	5	residential	0.038285493850708	0.228740394115448	male	male	adult		owned	roaming	entire	healthy	1
526	0.963103724703263	Medium	5	residential	0.0594974160194397	0.233416020870209	male	male	adult		owned	never roaming	entire	healthy	1
527	0.22061036823271	High	5	residential	0.0459426641464233	0.185511410236359	male	male	adult		owned	roaming	entire	healthy	1
528	0.45720592985497	Medium	5	residential	0.0463465452194214	0.173745393753052	female	female	puppy	not_preglact	owned	never roaming	entire	healthy	0
529	0.604394353556473	Medium	5	residential	0.0463465452194214	0.173745393753052	female	female	adult	not_preglact	owned	never roaming	entire	healthy	0
530	0.45720592985497	Medium	5	residential	0.0463465452194214	0.173745393753052	female	female	puppy	not_preglact	owned	never roaming	entire	healthy	0
531	0.991828058408213	Medium	5	residential	0.0710222125053406	0.274467587471008	female	female	adult	not_preglact	owned	roaming	entire	healthy	0
532	0.45720592985497	Medium	5	residential	0.0463465452194214	0.173745393753052	male	male	puppy		owned	never roaming	entire	healthy	0
533	0.604715923416977	Medium	5	residential	0.0463465452194214	0.173745393753052	female	female	puppy	not_preglact	owned	never roaming	entire	disease	0
534	0.216077071061454	High	5	residential	0.0505467057228088	0.20075660943985	unknown	unknown	adult		owned	roaming	unknown_neuter	unknown_health	0
535	0.45720592985497	Medium	5	residential	0.0463465452194214	0.173745393753052	male	male	puppy		owned	never roaming	entire	healthy	0
536	0.550983930110546	High	5	residential	0.059701144695282	0.187464237213135	female	female	puppy	not_preglact	owned	NA	entire	healthy	0
537	0.45720592985497	Medium	5	residential	0.0463465452194214	0.173745393753052	female	female	puppy	not_preglact	owned	never roaming	entire	healthy	0
538	0.990891394946487	Medium	5	residential	0.0710222125053406	0.274467587471008	female	female	adult	not_preglact	owned	never roaming	entire	healthy	0
539	0.550983930110546	High	5	residential	0.059701144695282	0.187464237213135	male	male	puppy		owned	NA	entire	healthy	0
540	0.937594830020381	Medium	5	residential	0.0531797409057617	0.227031588554382	male	male	adult		owned	never roaming	entire	healthy	0
541	0.45720592985497	Medium	5	residential	0.0463465452194214	0.173745393753052	female	female	puppy	not_preglact	owned	never roaming	entire	healthy	0
542	0.550983930110546	High	5	residential	0.059701144695282	0.187464237213135	male	male	puppy		owned	NA	entire	healthy	0
543	0.947374825036189	Medium	5	residential	0.0594974160194397	0.233416020870209	male	male	adult		owned	never roaming	entire	healthy	1
544	1.21687791598915	Low	5	residential	0.129744291305542	0.400284826755524	female	female	adult	not_preglact	owned	roaming	entire	healthy	0
545	2.00970554590493	Low	3	residential	0.162043690681458	0.441577434539795	male	male	adult		owned	never roaming	neutered	healthy	0
546	0.847158005882525	Medium	5	residential	0.0407751202583313	0.178423881530762	female	female	adult	not_preglact	owned	NA	entire	healthy	0
547	0.99083490750108	Medium	5	residential	0.0710222125053406	0.274467587471008	male	male	adult		owned	roaming	entire	healthy	0
548	0.997564129282505	Medium	5	residential	0.0710569620132446	0.23350864648819	unknown	unknown	adult		owned	never roaming	unknown_neuter	unknown_health	1
549	0.268611101478369	Medium	5	residential	0.0505467057228088	0.20075660943985	female	female	adult	not_preglact	owned	never roaming	entire	healthy	1
550	0.531693792480125	High	5	residential	0.0620661377906799	0.245069324970245	female	female	puppy	not_preglact	owned	roaming	entire	healthy	0
551	0.605575021848996	Medium	5	residential	0.0463465452194214	0.173745393753052	female	female	adult	not_preglact	owned	never roaming	neutered	healthy	0
552	0.947467956945152	Medium	5	residential	0.0594974160194397	0.233416020870209	female	female	adult	not_preglact	owned	never roaming	entire	healthy	1
553	1.92783263605667	Low	5	residential	0.129744291305542	0.400284826755524	male	male	adult		owned	never roaming	neutered	healthy	0
554	0.542589123213663	High	5	residential	0.059701144695282	0.187464237213135	female	female	adult	not_preglact	owned	NA	neutered	healthy	0
555	0.991568894093511	Medium	5	residential	0.0710222125053406	0.274467587471008	female	female	adult	not_preglact	owned	roaming	entire	healthy	0
556	0.947519215462508	Medium	5	residential	0.0594974160194397	0.233416020870209	male	male	adult		owned	never roaming	entire	healthy	1
557	0.690817168299476	High	5	residential	0.038285493850708	0.228740394115448	male	male	adult		owned	roaming	entire	healthy	0
558	0.690817168299476	High	5	residential	0.038285493850708	0.228740394115448	male	male	adult		owned	roaming	entire	healthy	0
559	0.605911346085367	Medium	5	residential	0.0463465452194214	0.173745393753052	female	female	adult	not_preglact	owned	never roaming	entire	healthy	0
560	1.73611903643606	Low	5	residential	0.129744291305542	0.400284826755524	male	male	adult		owned	roaming	entire	healthy	0
561	0.847158005882525	Medium	5	residential	0.0407751202583313	0.178423881530762	female	female	puppy	not_preglact	owned	NA	entire	healthy	0
562	0.993721313951456	Medium	5	residential	0.0710222125053406	0.274467587471008	male	male	adult		owned	never roaming	neutered	healthy	0
563	0.939830813136738	Medium	5	residential	0.0710569620132446	0.23350864648819	unknown	unknown	adult		owned	never roaming	unknown_neuter	healthy	1
564	1.73441757331968	Low	5	residential	0.129744291305542	0.400284826755524	male	male	adult		owned	roaming	entire	healthy	0
565	0.544500099101339	High	5	residential	0.059701144695282	0.187464237213135	male	male	adult		owned	NA	entire	healthy	0
566	0.993836763404946	Medium	5	residential	0.0710222125053406	0.274467587471008	male	male	adult		owned	never roaming	neutered	healthy	0
567	1.25175109536537	Low	5	residential	0.129744291305542	0.400284826755524	female	female	adult	not_preglact	owned	roaming	entire	healthy	0
568	0.98040940203663	Medium	5	residential	0.0531797409057617	0.227031588554382	male	male	adult		owned	never roaming	neutered	healthy	0
569	0.972675677067669	Medium	5	residential	0.0531797409057617	0.227031588554382	male	male	adult		owned	roaming	entire	healthy	1
570	0.991360850250057	Medium	5	residential	0.0710222125053406	0.274467587471008	male	male	adult		owned	roaming	neutered	healthy	0
571	0.230853312736191	High	5	residential	0.0505467057228088	0.20075660943985	female	female	adult	not_preglact	owned	roaming	entire	healthy	1
572	0.963967924068364	Medium	5	residential	0.0531797409057617	0.227031588554382	male	male	adult		owned	roaming	entire	healthy	1
573	0.691110654572952	High	5	residential	0.038285493850708	0.228740394115448	female	female	adult	not_preglact	owned	roaming	entire	healthy	0
574	0.669645880319655	Medium	5	residential	0.0710569620132446	0.23350864648819	male	male	adult		owned	roaming	entire	disease	1
575	1.21228123595435	Low	5	residential	0.129744291305542	0.400284826755524	male	male	adult		owned	roaming	entire	healthy	0
576	0.968942750609215	Medium	5	residential	0.0531797409057617	0.227031588554382	female	female	adult	not_preglact	owned	roaming	entire	healthy	1
577	0.743306378874541	Medium	5	residential	0.0710222125053406	0.274467587471008	female	female	adult	not_preglact	owned	roaming	entire	healthy	0
578	0.991075178401565	Medium	5	residential	0.0710222125053406	0.274467587471008	female	female	adult	not_preglact	owned	never roaming	entire	healthy	0
579	0.652586575447999	High	5	residential	0.038285493850708	0.228740394115448	female	female_preg/lact	adult	yes_lact	owned	roaming	entire	healthy	1
580	0.42935628704618	High	5	residential	0.0620661377906799	0.245069324970245	male	male	adult		owned	roaming	entire	healthy	1
581	0.671331188850136	Medium	5	residential	0.0710569620132446	0.23350864648819	female	female_preg/lact	adult	yes_lact	owned	roaming	entire	unknown_health	1
582	0.969859859521311	Medium	5	residential	0.0531797409057617	0.227031588554382	male	male	adult		owned	roaming	entire	healthy	0
583	0.657450022902722	High	5	residential	0.038285493850708	0.228740394115448	male	male	adult		owned	roaming	entire	healthy	1
584	0.55836255583933	High	5	residential	0.059701144695282	0.187464237213135	female	female	adult	not_preglact	owned	never roaming	entire	disease	0
585	0.650139156470605	High	5	residential	0.038285493850708	0.228740394115448	male	male	puppy		owned	roaming	entire	healthy	0
586	0.388956851261509	High	5	residential	0.059701144695282	0.187464237213135	male	male	adult		owned	never roaming	entire	healthy	0
587	0.675309248248307	Medium	5	residential	0.0710569620132446	0.23350864648819	female	female	puppy	not_preglact	owned	never roaming	entire	healthy	0
588	0.675309248248307	Medium	5	residential	0.0710569620132446	0.23350864648819	female	female	puppy	not_preglact	owned	never roaming	entire	healthy	0
589	0.45720592985497	Medium	5	residential	0.0463465452194214	0.173745393753052	male	male	adult		owned	roaming	entire	healthy	0
590	0.45720592985497	Medium	5	residential	0.0463465452194214	0.173745393753052	male	male	adult		owned	roaming	entire	healthy	0
591	0.558079468830173	High	5	residential	0.059701144695282	0.187464237213135	male	male	adult		owned	never roaming	entire	healthy	0
592	0.688245498504998	Medium	3	NA	0.0737190246582031	0.275673091411591	male	male	adult		owned	never roaming	neutered	healthy	0
593	0.422096293496638	High	5	residential	0.0620661377906799	0.245069324970245	female	female	adult	not_preglact	owned	roaming	entire	healthy	1
594	1.01369880041506	Medium	5	residential	0.0531797409057617	0.227031588554382	female	female	adult	not_preglact	owned	never roaming	entire	healthy	0
595	0.558079468830173	High	5	residential	0.059701144695282	0.187464237213135	male	male	adult		owned	never roaming	entire	healthy	0
596	0.647253881889251	Low	5	residential	0.0949823260307312	0.330526471138	male	male	adult		owned	never roaming	neutered	healthy	0
597	1.21517262572087	Low	5	residential	0.129744291305542	0.400284826755524	male	male	adult		owned	roaming	entire	disease	0
598	0.675426437121349	Medium	5	residential	0.0710569620132446	0.23350864648819	female	female	puppy	not_preglact	owned	never roaming	entire	healthy	0
599	0.675426437121349	Medium	5	residential	0.0710569620132446	0.23350864648819	female	female	puppy	not_preglact	owned	never roaming	entire	healthy	0
600	0.561547625906072	High	5	residential	0.059701144695282	0.187464237213135	male	male	adult		owned	NA	entire	healthy	0
601	0.675426437121349	Medium	5	residential	0.0710569620132446	0.23350864648819	male	male	puppy		owned	never roaming	entire	healthy	0
602	0.652595128437137	High	5	residential	0.038285493850708	0.228740394115448	female	female	puppy	not_preglact	owned	roaming	entire	healthy	1
603	1.00893141725515	Medium	5	residential	0.0531797409057617	0.227031588554382	female	female	adult	not_preglact	owned	never roaming	neutered	healthy	0
604	0.991462414306795	Medium	5	residential	0.0710222125053406	0.274467587471008	female	female	adult	not_preglact	owned	never roaming	entire	healthy	0
605	0.675426437121349	Medium	5	residential	0.0710569620132446	0.23350864648819	female	female_preg/lact	puppy	yes_lact	owned	never roaming	entire	healthy	0
606	0.809189709569016	Medium	5	residential	0.0407751202583313	0.178423881530762	male	male	puppy		owned	NA	unknown_neuter	healthy	0
607	0.649644892930875	High	5	residential	0.038285493850708	0.228740394115448	male	male	adult		owned	roaming	entire	healthy	1
608	0.991458280978476	Medium	5	residential	0.0710222125053406	0.274467587471008	male	male	adult		owned	never roaming	entire	healthy	0
609	0.196065529664835	High	5	residential	0.0505467057228088	0.20075660943985	male	male	adult		owned	never roaming	entire	healthy	0
610	2.08747679623039	Low	3	residential	0.162043690681458	0.441577434539795	female	female	adult	not_preglact	owned	never roaming	entire	healthy	0
611	0.807883442134046	Medium	5	residential	0.0407751202583313	0.178423881530762	male	male	puppy		owned	NA	unknown_neuter	healthy	0
612	0.971084416758518	Medium	5	residential	0.0531797409057617	0.227031588554382	male	male	puppy		owned	never roaming	entire	healthy	0
613	0.675426437121349	Medium	5	residential	0.0710569620132446	0.23350864648819	female	female_preg/lact	puppy	yes_lact	owned	never roaming	entire	healthy	0
614	0.37423653410231	High	5	residential	0.059701144695282	0.187464237213135	unknown	unknown	adult		owned	NA	unknown_neuter	unknown_health	1
615	0.924913479629886	Medium	5	residential	0.0531797409057617	0.227031588554382	male	male	puppy		owned	never roaming	entire	healthy	0
616	0.837740810396905	Medium	5	residential	0.0594974160194397	0.233416020870209	female	female	adult	not_preglact	owned	never roaming	entire	healthy	0
617	0.560791306982791	High	5	residential	0.059701144695282	0.187464237213135	female	female	adult	not_preglact	owned	NA	entire	disease	0
618	0.675426437121349	Medium	5	residential	0.0710569620132446	0.23350864648819	male	male	puppy		owned	never roaming	entire	healthy	0
619	0.991790281719449	Medium	5	residential	0.0710222125053406	0.274467587471008	female	female_preg/lact	adult	yes_lact	owned	never roaming	entire	healthy	0
620	0.924913479629886	Medium	5	residential	0.0531797409057617	0.227031588554382	female	female_preg/lact	adult	yes_lact	owned	roaming	entire	healthy	1
621	0.606092165409242	Medium	5	residential	0.0463465452194214	0.173745393753052	male	male	adult		owned	never roaming	unknown_neuter	unknown_health	1
622	0.505641733629854	High	5	residential	0.0620661377906799	0.245069324970245	female	female_preg/lact	adult	yes_lact	owned	roaming	entire	disease	1
623	0.404112836879381	Medium	5	residential	0.0463465452194214	0.173745393753052	male	male	adult		owned	roaming	entire	healthy	0
624	0.404112836879381	Medium	5	residential	0.0463465452194214	0.173745393753052	male	male	adult		owned	roaming	entire	healthy	0
625	0.395957078338979	High	5	residential	0.059701144695282	0.187464237213135	female	female	adult	not_preglact	owned	never roaming	entire	healthy	1
626	0.494062250056074	High	5	residential	0.0620661377906799	0.245069324970245	male	male	puppy		owned	roaming	entire	healthy	0
627	0.996938402044523	Medium	5	residential	0.0531797409057617	0.227031588554382	male	male	adult		owned	roaming	neutered	healthy	0
628	2.1986352854155	Low	3	residential	0.162043690681458	0.441577434539795	female	female	adult	not_preglact	owned	never roaming	entire	healthy	0
629	0.990576669779377	Medium	5	residential	0.0710222125053406	0.274467587471008	male	male	adult		owned	never roaming	unknown_neuter	healthy	0
630	0.610462271805735	Low	5	residential	0.0459426641464233	0.185511410236359	male	male	adult		owned	roaming	entire	healthy	0
631	0.836613757171445	Medium	5	residential	0.0594974160194397	0.233416020870209	male	male	adult		owned	roaming	entire	disease	0
632	2.19807117507793	Low	3	residential	0.162043690681458	0.441577434539795	female	female	adult	not_preglact	owned	never roaming	entire	healthy	0
633	0.924233788650098	Medium	5	residential	0.0531797409057617	0.227031588554382	male	male	adult		owned	roaming	entire	healthy	1
634	0.497379693289122	High	5	residential	0.0620661377906799	0.245069324970245	female	female	puppy	not_preglact	owned	roaming	entire	healthy	0
635	1.02813199012621	Medium	5	residential	0.0531797409057617	0.227031588554382	male	male	adult		owned	roaming	neutered	healthy	0
636	0.649644892930875	High	5	residential	0.038285493850708	0.228740394115448	male	male	adult		owned	never roaming	entire	healthy	1
637	0.15758354639726	High	5	residential	0.0505467057228088	0.20075660943985	male	male	adult		owned	never roaming	entire	healthy	0
638	0.49557975404743	High	5	residential	0.0620661377906799	0.245069324970245	male	male	puppy		owned	roaming	entire	healthy	0
639	0.384984526206346	High	5	residential	0.059701144695282	0.187464237213135	unknown	unknown	adult		owned	never roaming	unknown_neuter	healthy	1
640	0.499177053910024	High	5	residential	0.0620661377906799	0.245069324970245	male	male	puppy		owned	roaming	entire	healthy	0
641	1.02813199012621	Medium	5	residential	0.0531797409057617	0.227031588554382	male	male	adult		owned	roaming	neutered	healthy	0
642	0.755562454963956	Medium	5	residential	0.0463465452194214	0.173745393753052	male	male	adult		owned	never roaming	unknown_neuter	unknown_health	1
643	0.488372386997958	High	5	residential	0.0620661377906799	0.245069324970245	male	male	puppy		owned	roaming	entire	healthy	0
644	0.0199025617049556	High	5	residential	0.0505467057228088	0.20075660943985	male	male	adult		owned	roaming	entire	healthy	0
645	1.02813199012621	Medium	5	residential	0.0531797409057617	0.227031588554382	male	male	adult		owned	never roaming	neutered	healthy	0
646	0.724591815648562	Medium	5	residential	0.0463465452194214	0.173745393753052	male	male	adult		owned	never roaming	entire	healthy	0
647	0.0199025617049556	High	5	residential	0.0505467057228088	0.20075660943985	female	female	adult	unknown_preglact	owned	roaming	entire	healthy	0
648	0.157503639840194	High	5	residential	0.0505467057228088	0.20075660943985	male	male	adult		owned	roaming	entire	healthy	1
649	1.02813199012621	Medium	5	residential	0.0531797409057617	0.227031588554382	male	male	adult		owned	never roaming	neutered	healthy	0
650	0.0199025617049556	High	5	residential	0.0505467057228088	0.20075660943985	female	female	adult	unknown_preglact	owned	roaming	entire	healthy	0
651	0.376094057617581	High	5	residential	0.059701144695282	0.187464237213135	unknown	unknown	adult		owned	never roaming	unknown_neuter	unknown_health	1
652	0.722714040202139	Medium	5	residential	0.0463465452194214	0.173745393753052	male	male	adult		owned	never roaming	neutered	healthy	0
653	0.471746454373057	High	5	residential	0.059701144695282	0.187464237213135	female	female	adult	not_preglact	owned	NA	entire	disease	0
654	0.924233788650098	Medium	5	residential	0.0531797409057617	0.227031588554382	female	female	adult	not_preglact	owned	roaming	entire	healthy	0
655	0.398712949540263	High	5	residential	0.059701144695282	0.187464237213135	male	male	adult		owned	never roaming	entire	healthy	0
656	0.723874205322807	Medium	5	residential	0.0463465452194214	0.173745393753052	female	female	adult	not_preglact	owned	roaming	entire	healthy	0
657	0.39682185344406	High	5	residential	0.059701144695282	0.187464237213135	female	female_preg/lact	adult	yes_preg	owned	never roaming	entire	healthy	0
658	0.475681611341172	High	5	residential	0.0620661377906799	0.245069324970245	male	male	adult		stray	NA	entire	healthy	0
659	1.88671711279611	Low	5	residential	0.131640493869781	0.40896338224411	male	male	adult		owned	never roaming	entire	healthy	0
660	0.55988790928101	Medium	5	residential	0.0710222125053406	0.274467587471008	male	male	adult		owned	never roaming	entire	healthy	1
661	2.17024111533451	Low	3	residential	0.162043690681458	0.441577434539795	male	male	adult		owned	roaming	entire	healthy	0
662	0.675426437121349	Medium	5	residential	0.0710569620132446	0.23350864648819	female	female	adult	not_preglact	owned	roaming	entire	healthy	1
663	0.399808571054856	High	5	residential	0.059701144695282	0.187464237213135	unknown	unknown	adult		owned	never roaming	entire	unknown_health	1
664	0.723874205322807	Medium	5	residential	0.0463465452194214	0.173745393753052	male	male	adult		owned	roaming	entire	unknown_health	1
665	1.08550519785784	Medium	5	residential	0.0673660039901733	0.308183014392853	female	female_preg/lact	adult	yes_lact	owned	never roaming	entire	unknown_health	1
666	0.360710662388859	Medium	5	residential	0.0407751202583313	0.178423881530762	male	male	adult		owned	never roaming	entire	disease	0
667	0.360710662388859	Medium	5	residential	0.0407751202583313	0.178423881530762	male	male	adult		owned	never roaming	entire	disease	0
668	0.321447273521928	High	5	residential	0.0459426641464233	0.185511410236359	male	male	adult		owned	roaming	entire	healthy	1
669	0.361282786630383	Medium	5	residential	0.0407751202583313	0.178423881530762	male	male	adult		owned	never roaming	entire	healthy	0
670	0.361282786630383	Medium	5	residential	0.0407751202583313	0.178423881530762	male	male	adult		owned	never roaming	entire	healthy	0
671	0.723874205322807	Medium	5	residential	0.0463465452194214	0.173745393753052	male	male	adult		owned	roaming	entire	unknown_health	1
672	0.401216167323358	High	5	residential	0.0620661377906799	0.245069324970245	male	male	adult		owned	roaming	entire	healthy	0
673	1.09456180699664	Medium	5	residential	0.0673660039901733	0.308183014392853	male	male	puppy		owned	never roaming	entire	healthy	0
674	0.398364107554529	High	5	residential	0.059701144695282	0.187464237213135	female	female_preg/lact	adult	yes_lact	owned	never roaming	entire	disease	0
675	0.621275806015638	High	5	residential	0.038285493850708	0.228740394115448	male	male	adult		owned	roaming	entire	healthy	0
676	0.363773617259528	Medium	5	residential	0.0407751202583313	0.178423881530762	female	female	adult	not_preglact	owned	never roaming	entire	healthy	0
677	0.133767252227852	High	5	residential	0.0505467057228088	0.20075660943985	male	male	adult		owned	never roaming	entire	healthy	1
678	0.992275766458153	Medium	5	residential	0.0710222125053406	0.274467587471008	unknown	unknown	adult		owned	NA	unknown_neuter	healthy	0
679	1.09456180699664	Medium	5	residential	0.0673660039901733	0.308183014392853	female	female	puppy	not_preglact	owned	never roaming	entire	healthy	0
680	0.992397646656685	Medium	5	residential	0.0710222125053406	0.274467587471008	male	male	adult		owned	roaming	entire	healthy	0
681	2.11207201954578	Low	3	residential	0.162043690681458	0.441577434539795	female	female	adult	not_preglact	owned	roaming	entire	healthy	0
682	1.09456180699664	Medium	5	residential	0.0673660039901733	0.308183014392853	male	male	adult		owned	never roaming	entire	healthy	0
683	0.992055357180914	Medium	5	residential	0.0710222125053406	0.274467587471008	male	male	adult		owned	never roaming	entire	healthy	0
684	0.320251849114548	High	5	residential	0.0459426641464233	0.185511410236359	female	female_preg/lact	adult	yes_preg	owned	roaming	entire	healthy	1
685	2.10162789769567	Low	3	residential	0.162043690681458	0.441577434539795	female	female	adult	not_preglact	owned	roaming	entire	healthy	0
686	1.33972965507644	Low	5	residential	0.129744291305542	0.400284826755524	male	male	adult		owned	roaming	entire	healthy	0
687	1.88671711279611	Low	5	residential	0.131640493869781	0.40896338224411	male	male	adult		owned	roaming	entire	healthy	0
688	0.158150561094634	High	5	residential	0.0505467057228088	0.20075660943985	female	female	adult	not_preglact	owned	never roaming	entire	healthy	1
689	2.07788803531049	Low	3	residential	0.162043690681458	0.441577434539795	female	female	adult	not_preglact	owned	roaming	entire	healthy	0
690	1.88671711279611	Low	5	residential	0.131640493869781	0.40896338224411	male	male	adult		owned	never roaming	entire	healthy	0
691	0.990917855861212	Medium	5	residential	0.0710222125053406	0.274467587471008	female	female	adult	not_preglact	owned	roaming	entire	healthy	0
692	1.88671711279611	Low	5	residential	0.131640493869781	0.40896338224411	female	female	adult	not_preglact	owned	roaming	entire	healthy	0
693	1.33972965507644	Low	5	residential	0.129744291305542	0.400284826755524	male	male	adult		owned	roaming	entire	healthy	0
694	1.88671711279611	Low	5	residential	0.131640493869781	0.40896338224411	female	female	adult	not_preglact	owned	roaming	entire	healthy	0
695	1.88671711279611	Low	5	residential	0.131640493869781	0.40896338224411	female	female	adult	not_preglact	owned	roaming	entire	healthy	0
696	0.991476103861771	Medium	5	residential	0.0710222125053406	0.274467587471008	female	female_preg/lact	adult	yes_lact	owned	never roaming	entire	healthy	0
697	1.09456180699664	Medium	5	residential	0.0673660039901733	0.308183014392853	female	female	puppy	not_preglact	owned	never roaming	entire	healthy	0
698	0.739734493041455	Medium	5	residential	0.0793020129203796	0.280927658081055	male	male	adult		owned	roaming	entire	healthy	0
699	0.308148331981268	High	5	residential	0.0620661377906799	0.245069324970245	female	female_preg/lact	adult	yes_preg	owned	roaming	entire	healthy	0
700	0.562731843225295	Medium	5	residential	0.0710222125053406	0.274467587471008	male	male	adult		owned	roaming	entire	healthy	1
701	0.336166517733221	High	5	residential	0.059701144695282	0.187464237213135	male	male	adult		owned	NA	entire	healthy	0
702	0.732091666827665	Medium	5	residential	0.0463465452194214	0.173745393753052	male	male	adult		owned	NA	entire	healthy	0
703	0.991878711555537	Medium	5	residential	0.0710222125053406	0.274467587471008	male	male	adult		owned	roaming	entire	healthy	0
704	0.702853506642802	Medium	5	residential	0.0463465452194214	0.173745393753052	female	female	puppy	not_preglact	stray	NA	entire	healthy	0
705	1.34374520182785	Low	5	residential	0.129744291305542	0.400284826755524	male	male	adult		owned	roaming	entire	healthy	0
706	1.08048690449439	Medium	5	residential	0.0531797409057617	0.227031588554382	male	male	adult		owned	roaming	entire	healthy	0
707	0.332718023078591	Medium	5	residential	0.0407751202583313	0.178423881530762	male	male	adult		owned	roaming	entire	healthy	1
708	0.740862046545767	Medium	5	residential	0.0793020129203796	0.280927658081055	male	male	adult		owned	roaming	entire	healthy	0
709	0.730836003148553	Medium	5	residential	0.0463465452194214	0.173745393753052	unknown	unknown	adult		owned	NA	unknown_neuter	healthy	0
710	0.991668073980511	Medium	5	residential	0.0710222125053406	0.274467587471008	female	female	adult	not_preglact	owned	never roaming	entire	healthy	0
711	0.308060609032233	High	5	residential	0.0620661377906799	0.245069324970245	male	male	adult		owned	roaming	entire	healthy	1
712	2.02180376345574	Low	5	residential	0.129744291305542	0.400284826755524	male	male	puppy		owned	never roaming	entire	healthy	0
713	0.73030621871544	Medium	5	residential	0.0463465452194214	0.173745393753052	female	female	puppy	not_preglact	owned	roaming	entire	healthy	0
714	0.165112292642398	High	5	residential	0.0505467057228088	0.20075660943985	female	female	adult	not_preglact	owned	never roaming	entire	healthy	0
715	2.02798139080604	Low	5	residential	0.129744291305542	0.400284826755524	female	female	adult	not_preglact	owned	roaming	entire	healthy	0
716	1.13514847885468	Medium	5	residential	0.038364052772522	0.194374203681946	female	female	adult	not_preglact	owned	never roaming	entire	healthy	0
717	0.286398037012137	High	5	residential	0.0459426641464233	0.185511410236359	female	female	adult	not_preglact	owned	roaming	entire	healthy	1
718	0.991820795564114	Medium	5	residential	0.0710222125053406	0.274467587471008	male	male	adult		owned	roaming	neutered	healthy	0
719	0.991820795564114	Medium	5	residential	0.0710222125053406	0.274467587471008	female	female	adult	not_preglact	owned	never roaming	entire	healthy	0
720	0.73962764119518	Medium	5	residential	0.0793020129203796	0.280927658081055	male	male	adult		owned	roaming	entire	healthy	0
721	1.34422959051465	Low	5	residential	0.129744291305542	0.400284826755524	female	female	adult	not_preglact	owned	roaming	entire	healthy	0
722	1.09292755823864	Medium	5	residential	0.0673660039901733	0.308183014392853	male	male	adult		owned	never roaming	entire	healthy	0
723	1.91066474820317	Low	5	residential	0.129744291305542	0.400284826755524	male	male	adult		owned	roaming	entire	healthy	0
724	0.99232518843432	Medium	5	residential	0.0710222125053406	0.274467587471008	male	male	adult		owned	never roaming	entire	healthy	0
725	1.04957545204748	Medium	5	residential	0.0710569620132446	0.23350864648819	male	male	adult		owned	never roaming	entire	healthy	0
726	1.91066474820317	Low	5	residential	0.129744291305542	0.400284826755524	female	female	adult	not_preglact	owned	roaming	entire	healthy	0
727	0.990932379276343	Medium	5	residential	0.0710222125053406	0.274467587471008	male	male	adult		owned	roaming	entire	healthy	0
728	0.166172963081446	High	5	residential	0.0505467057228088	0.20075660943985	male	male	adult		owned	never roaming	entire	healthy	1
729	1.08593648613431	Medium	5	residential	0.0531797409057617	0.227031588554382	male	male	adult		owned	roaming	entire	disease	0
730	1.34422959051465	Low	5	residential	0.129744291305542	0.400284826755524	female	female	adult	not_preglact	owned	roaming	entire	healthy	1
731	0.64855395758155	Medium	5	residential	0.0710222125053406	0.274467587471008	female	female_preg/lact	adult	yes_preg	owned	never roaming	entire	healthy	1
732	0.990676855688875	Medium	5	residential	0.0710222125053406	0.274467587471008	male	male	adult		owned	roaming	entire	healthy	0
733	1.33629941740973	Low	5	residential	0.129744291305542	0.400284826755524	male	male	puppy		owned	roaming	entire	healthy	0
734	1.33739713956671	Low	5	residential	0.129744291305542	0.400284826755524	female	female	puppy	not_preglact	owned	roaming	entire	healthy	0
735	0.328184896409347	Medium	5	residential	0.0407751202583313	0.178423881530762	male	male	adult		owned	never roaming	entire	healthy	0
736	1.91020116885543	Low	5	residential	0.129744291305542	0.400284826755524	female	female	adult	not_preglact	owned	roaming	entire	healthy	0
737	1.19300637270877	Medium	5	residential	0.0407703518867493	0.209913432598114	male	male	adult		owned	roaming	entire	healthy	0
738	0.987700595550374	Medium	5	residential	0.0710222125053406	0.274467587471008	female	female_preg/lact	adult	yes_preg	owned	never roaming	entire	healthy	0
739	0.298514814396521	High	5	residential	0.059701144695282	0.187464237213135	female	female	adult	not_preglact	owned	never roaming	entire	healthy	0
740	0.370357145516306	Medium	5	residential	0.0407751202583313	0.178423881530762	female	female_preg/lact	adult	yes_lact	owned	never roaming	entire	healthy	0
741	1.19318075196374	Medium	5	residential	0.0407703518867493	0.209913432598114	male	male	adult		owned	roaming	entire	healthy	0
742	0.706708101080149	Medium	5	residential	0.0463465452194214	0.173745393753052	male	male	adult		owned	never roaming	entire	healthy	0
743	0.253356637427861	High	5	residential	0.059701144695282	0.187464237213135	female	female	adult	not_preglact	owned	never roaming	entire	healthy	0
744	0.600226044198916	Medium	5	residential	0.0710222125053406	0.274467587471008	female	female	adult	not_preglact	owned	never roaming	entire	healthy	1
745	0.987813291143509	Medium	5	residential	0.0710222125053406	0.274467587471008	male	male	adult		owned	never roaming	entire	healthy	0
746	1.91279829539695	Low	5	residential	0.129744291305542	0.400284826755524	female	female	adult	not_preglact	owned	roaming	entire	healthy	0
747	0.708370980926325	Medium	5	residential	0.0463465452194214	0.173745393753052	male	male	adult		owned	never roaming	entire	healthy	0
748	0.254973808155082	High	5	residential	0.059701144695282	0.187464237213135	male	male	adult		owned	never roaming	entire	healthy	0
749	0.475420544943373	High	5	residential	0.059701144695282	0.187464237213135	male	male	puppy		owned	never roaming	entire	healthy	0
750	0.983022139365595	Medium	5	residential	0.11014312505722	0.314207196235657	female	female	adult	not_preglact	owned	roaming	entire	healthy	0
751	0.370627265243938	Medium	5	residential	0.0407751202583313	0.178423881530762	female	female	adult	not_preglact	owned	never roaming	entire	healthy	0
752	1.08043052564607	Medium	5	residential	0.0710569620132446	0.23350864648819	male	male	adult		owned	never roaming	entire	unknown_health	0
753	0.251118017022501	High	5	residential	0.059701144695282	0.187464237213135	unknown	unknown	adult		owned	NA	unknown_neuter	unknown_health	1
754	1.36590433246908	Low	5	residential	0.129744291305542	0.400284826755524	male	male	adult		owned	roaming	entire	healthy	1
755	0.989057834408208	Medium	5	residential	0.0710222125053406	0.274467587471008	female	female	adult	not_preglact	owned	never roaming	entire	healthy	0
756	0.275950479560244	High	5	residential	0.0578145980834961	0.216015577316284	male	male	adult		owned	roaming	entire	healthy	0
757	0.211073689615425	High	5	residential	0.0459426641464233	0.185511410236359	male	male	adult		owned	never roaming	entire	healthy	0
758	0.368660402567399	Medium	5	residential	0.0407751202583313	0.178423881530762	female	female_preg/lact	adult	yes_preg	owned	never roaming	entire	healthy	0
759	1.08291317756352	Medium	5	residential	0.0710569620132446	0.23350864648819	female	female	adult	not_preglact	owned	never roaming	entire	healthy	0
760	0.989469395165104	Medium	5	residential	0.0710222125053406	0.274467587471008	male	male	puppy		owned	roaming	entire	healthy	0
761	0.474648278152806	High	5	residential	0.059701144695282	0.187464237213135	male	male	puppy		owned	never roaming	entire	healthy	0
762	0.372386328957039	Medium	5	residential	0.0407751202583313	0.178423881530762	male	male	puppy		owned	never roaming	entire	healthy	0
763	1.09059985152611	Medium	5	residential	0.0710569620132446	0.23350864648819	female	female	adult	not_preglact	owned	never roaming	unknown_neuter	healthy	0
764	1.19290967675037	Medium	5	residential	0.0407703518867493	0.209913432598114	female	female	adult	not_preglact	owned	roaming	neutered	healthy	0
765	1.94642491423739	Low	5	residential	0.129744291305542	0.400284826755524	male	male	adult		owned	roaming	entire	healthy	0
766	0.989469395165104	Medium	5	residential	0.0710222125053406	0.274467587471008	male	male	puppy		owned	roaming	entire	healthy	0
767	0.989469395165104	Medium	5	residential	0.0710222125053406	0.274467587471008	female	female	puppy	not_preglact	owned	roaming	entire	healthy	0
768	1.35740719669656	Low	5	residential	0.129744291305542	0.400284826755524	female	female	adult	not_preglact	owned	roaming	entire	healthy	0
769	0.867070985618078	Medium	5	residential	0.0793020129203796	0.280927658081055	male	male	adult		owned	never roaming	entire	healthy	0
770	1.0397219795656	Medium	5	residential	0.0594974160194397	0.233416020870209	male	male	adult		owned	never roaming	neutered	healthy	0
771	0.989469395165104	Medium	5	residential	0.0710222125053406	0.274467587471008	male	male	puppy		owned	roaming	entire	healthy	0
772	1.951666338685	Low	5	residential	0.129744291305542	0.400284826755524	female	female	adult	not_preglact	owned	roaming	entire	healthy	0
773	1.09096281640707	Medium	5	residential	0.0710569620132446	0.23350864648819	female	female	adult	not_preglact	owned	never roaming	entire	healthy	0
774	1.951666338685	Low	5	residential	0.129744291305542	0.400284826755524	male	male	adult		owned	roaming	entire	healthy	0
775	0.989022598130958	Medium	5	residential	0.0710222125053406	0.274467587471008	female	female_preg/lact	adult	yes_preg	owned	never roaming	entire	healthy	0
776	0.220806667172634	High	5	residential	0.0578145980834961	0.216015577316284	unknown	unknown	adult		owned	never roaming	unknown_neuter	unknown_health	1
777	1.37240969122724	Low	5	residential	0.129744291305542	0.400284826755524	male	male	adult		owned	roaming	entire	healthy	0
778	0.988891081064817	Medium	5	residential	0.0710222125053406	0.274467587471008	male	male	adult		owned	never roaming	entire	healthy	0
779	0.788765299756472	Medium	5	residential	0.0531797409057617	0.227031588554382	male	male	adult		owned	never roaming	entire	healthy	0
780	0.228597365133214	High	5	residential	0.0578145980834961	0.216015577316284	male	male	adult		owned	roaming	entire	disease	0
781	0.788225308797778	Medium	5	residential	0.0531797409057617	0.227031588554382	female	female	adult	not_preglact	owned	never roaming	entire	healthy	0
782	1.92732156714747	Low	5	residential	0.129744291305542	0.400284826755524	male	male	adult		owned	roaming	entire	healthy	0
783	0.987563674704065	Medium	5	residential	0.0710222125053406	0.274467587471008	male	male	adult		owned	never roaming	entire	healthy	0
784	1.36983311821433	Low	5	residential	0.129744291305542	0.400284826755524	male	male	puppy		owned	roaming	entire	disease	0
785	1.09176372785981	Medium	5	residential	0.038285493850708	0.228740394115448	male	male	adult		owned	roaming	entire	healthy	0
786	0.987681416331462	Medium	5	residential	0.0710222125053406	0.274467587471008	female	female_preg/lact	adult	yes_preg	owned	roaming	entire	healthy	0
787	0.780667233595735	Medium	5	residential	0.0531797409057617	0.227031588554382	male	male	adult		owned	never roaming	neutered	healthy	0
788	1.25779909787958	Medium	5	residential	0.0407703518867493	0.209913432598114	female	female	adult	not_preglact	owned	roaming	neutered	healthy	0
789	0.838570719324152	Medium	5	residential	0.0793020129203796	0.280927658081055	male	male	adult		owned	roaming	entire	healthy	0
790	1.37115093503674	Low	5	residential	0.129744291305542	0.400284826755524	male	male	puppy		owned	roaming	entire	disease	0
791	1.25779909787958	Medium	5	residential	0.0407703518867493	0.209913432598114	female	female	adult	not_preglact	owned	roaming	neutered	healthy	0
792	0.358143786151264	High	5	residential	0.059701144695282	0.187464237213135	female	female	adult	not_preglact	owned	never roaming	entire	healthy	1
793	1.08767695156415	Medium	5	residential	0.0710569620132446	0.23350864648819	male	male	adult		owned	never roaming	entire	unknown_health	0
794	0.203986047742852	High	5	residential	0.0578145980834961	0.216015577316284	female	female_preg/lact	adult	yes_lact	owned	roaming	entire	unknown_health	1
795	0.983022139365595	Medium	5	residential	0.11014312505722	0.314207196235657	female	female	adult	not_preglact	owned	roaming	entire	healthy	0
796	0.191448013518852	High	5	residential	0.0578145980834961	0.216015577316284	female	female	puppy	not_preglact	owned	roaming	entire	healthy	1
797	1.3759970685489	Low	5	residential	0.129744291305542	0.400284826755524	male	male	adult		owned	roaming	unknown_neuter	healthy	0
798	0.145712445962723	High	5	residential	0.0578145980834961	0.216015577316284	female	female	puppy	not_preglact	owned	roaming	entire	healthy	1
799	1.25779909787958	Medium	5	residential	0.0407703518867493	0.209913432598114	male	male	adult		owned	roaming	entire	healthy	0
800	0.84225708159821	Medium	5	residential	0.0793020129203796	0.280927658081055	male	male	adult		stray	NA	entire	healthy	0
801	1.97017058657195	Low	5	residential	0.129744291305542	0.400284826755524	female	female	adult	not_preglact	owned	never roaming	entire	healthy	0
802	0.250960482599517	High	5	residential	0.0578145980834961	0.216015577316284	male	male	adult		owned	never roaming	entire	healthy	0
803	0.761462040531987	Medium	5	residential	0.0531797409057617	0.227031588554382	male	male	adult		owned	never roaming	neutered	healthy	0
804	0.674741625254477	Medium	5	residential	0.0710222125053406	0.274467587471008	male	male	adult		owned	never roaming	entire	healthy	1
805	0.159094678510055	High	5	residential	0.0578145980834961	0.216015577316284	male	male	puppy		owned	roaming	entire	healthy	1
806	0.732002199858965	Medium	5	residential	0.0531797409057617	0.227031588554382	male	male	adult		owned	never roaming	neutered	healthy	0
807	0.984427950451121	Medium	5	residential	0.0710222125053406	0.274467587471008	female	female	adult	not_preglact	owned	never roaming	entire	healthy	0
808	0.160399922144464	High	5	residential	0.0578145980834961	0.216015577316284	male	male	puppy		owned	roaming	entire	healthy	1
809	0.366281958827998	High	5	residential	0.0620661377906799	0.245069324970245	female	female	adult	not_preglact	owned	NA	entire	healthy	0
810	0.165559975966895	High	5	residential	0.0578145980834961	0.216015577316284	male	male	puppy		owned	roaming	entire	healthy	1
811	0.791128245481344	Medium	5	residential	0.0710569620132446	0.23350864648819	female	female_preg/lact	adult	yes_preg	owned	never roaming	entire	healthy	1
812	0.88233758831635	Medium	5	residential	0.0710569620132446	0.23350864648819	female	female	adult	not_preglact	owned	never roaming	unknown_neuter	healthy	0
813	0.177975978268785	High	5	residential	0.0578145980834961	0.216015577316284	male	male	puppy		owned	roaming	entire	healthy	1
814	0.989710790181492	Medium	5	residential	0.0710222125053406	0.274467587471008	male	male	adult		owned	roaming	entire	healthy	0
815	0.227402905476116	High	5	residential	0.059701144695282	0.187464237213135	male	male	adult		owned	never roaming	entire	healthy	0
816	0.467492593692078	Medium	5	residential	0.0407751202583313	0.178423881530762	female	female	puppy	not_preglact	owned	never roaming	entire	healthy	1
817	0.886297188255758	Medium	5	residential	0.0710569620132446	0.23350864648819	female	female	adult	not_preglact	owned	NA	unknown_neuter	healthy	0
818	0.884307054467006	Medium	5	residential	0.0710569620132446	0.23350864648819	female	female	adult	not_preglact	owned	NA	unknown_neuter	healthy	0
819	0.727324615885842	Medium	5	residential	0.0463465452194214	0.173745393753052	male	male	adult		owned	NA	neutered	disease	0
820	0.989710790181492	Medium	5	residential	0.0710222125053406	0.274467587471008	male	male	adult		owned	roaming	entire	healthy	0
821	0.190570262125139	High	5	residential	0.0578145980834961	0.216015577316284	male	male	adult		owned	NA	entire	disease	1
822	0.0771593248038087	High	5	residential	0.0505467057228088	0.20075660943985	male	male	adult		owned	roaming	entire	healthy	0
823	1.0739891249464	Medium	5	residential	0.038285493850708	0.228740394115448	female	female	adult	not_preglact	owned	never roaming	entire	disease	0
824	0.362724375328618	High	5	residential	0.0620661377906799	0.245069324970245	female	female	adult	not_preglact	owned	NA	entire	healthy	0
825	1.25766796873523	Medium	5	residential	0.0407703518867493	0.209913432598114	male	male	adult		owned	roaming	entire	healthy	0
826	0.727324615885842	Medium	5	residential	0.0463465452194214	0.173745393753052	male	male	adult		owned	never roaming	neutered	healthy	0
827	1.95393816781521	Low	5	residential	0.129744291305542	0.400284826755524	female	female	adult	not_preglact	owned	roaming	entire	healthy	0
828	0.836908806995448	Medium	5	residential	0.0793020129203796	0.280927658081055	male	male	adult		owned	roaming	entire	healthy	0
829	0.227975977960912	High	5	residential	0.059701144695282	0.187464237213135	female	female	adult	unknown_preglact	owned	never roaming	unknown_neuter	healthy	1
830	1.95645223056721	Low	5	residential	0.129744291305542	0.400284826755524	female	female	adult	not_preglact	owned	roaming	entire	healthy	0
831	0.468939772484726	Medium	5	residential	0.0407751202583313	0.178423881530762	male	male	adult		owned	never roaming	entire	healthy	1
832	0.990276931377233	Medium	5	residential	0.0710222125053406	0.274467587471008	male	male	adult		owned	never roaming	entire	healthy	0
833	0.727324615885842	Medium	5	residential	0.0463465452194214	0.173745393753052	male	male	adult		owned	never roaming	neutered	disease	0
834	0.727324615885842	Medium	5	residential	0.0463465452194214	0.173745393753052	male	male	adult		owned	never roaming	entire	healthy	0
835	1.93451308124446	Low	5	residential	0.129744291305542	0.400284826755524	female	female	adult	not_preglact	owned	roaming	entire	healthy	0
836	0.366959711905815	High	5	residential	0.0620661377906799	0.245069324970245	male	male	adult		owned	NA	entire	disease	0
837	1.49041604554035	Low	5	residential	0.129744291305542	0.400284826755524	male	male	adult		owned	roaming	entire	healthy	0
838	0.74629366373944	Medium	5	residential	0.0531797409057617	0.227031588554382	female	female	adult	not_preglact	owned	never roaming	entire	healthy	0
839	1.93451308124446	Low	5	residential	0.129744291305542	0.400284826755524	female	female_preg/lact	adult	yes_preg	owned	roaming	entire	healthy	0
840	0.989308560291831	Medium	5	residential	0.0710222125053406	0.274467587471008	female	female	adult	not_preglact	owned	never roaming	entire	healthy	0
841	0.371338820695261	High	5	residential	0.0459426641464233	0.185511410236359	male	male	adult		owned	never roaming	entire	healthy	0
842	0.203240624163883	High	5	residential	0.0578145980834961	0.216015577316284	female	female	adult	not_preglact	owned	roaming	entire	healthy	0
843	1.93451308124446	Low	5	residential	0.129744291305542	0.400284826755524	female	female	adult	not_preglact	owned	roaming	entire	healthy	0
844	0.926176595664029	Medium	5	residential	0.0793020129203796	0.280927658081055	male	male	adult		owned	roaming	entire	healthy	1
845	0.885506720744262	Medium	5	residential	0.0710569620132446	0.23350864648819	female	female	adult	not_preglact	owned	never roaming	entire	healthy	0
846	0.834202817941002	Medium	5	residential	0.0710222125053406	0.274467587471008	female	female	adult	not_preglact	owned	never roaming	entire	healthy	1
847	0.983022139365595	Medium	5	residential	0.11014312505722	0.314207196235657	male	male	adult		owned	roaming	unknown_neuter	healthy	0
848	0.0592310844584845	High	5	residential	0.0578145980834961	0.216015577316284	male	male	adult		owned	never roaming	entire	healthy	1
849	0.364882964221887	High	5	residential	0.0620661377906799	0.245069324970245	female	female	puppy	not_preglact	owned	NA	entire	healthy	0
850	1.49041604554035	Low	5	residential	0.129744291305542	0.400284826755524	female	female	adult	not_preglact	owned	roaming	entire	healthy	0
851	0.364882964221887	High	5	residential	0.0620661377906799	0.245069324970245	female	female	adult	not_preglact	owned	NA	entire	healthy	0
852	1.49041604554035	Low	5	residential	0.129744291305542	0.400284826755524	female	female	adult	not_preglact	owned	roaming	entire	healthy	1
853	0.496632499744659	Medium	5	residential	0.0407751202583313	0.178423881530762	male	male	adult		owned	roaming	entire	healthy	0
854	0.812175417946776	Medium	5	residential	0.0710569620132446	0.23350864648819	unknown	unknown	adult		owned	NA	unknown_neuter	unknown_health	1
855	1.93437544277319	Low	5	residential	0.129744291305542	0.400284826755524	male	male	adult		owned	roaming	entire	healthy	0
856	1.31478298904153	Medium	5	residential	0.0407703518867493	0.209913432598114	female	female	adult	not_preglact	owned	roaming	entire	healthy	0
857	1.93451477708308	Low	5	residential	0.129744291305542	0.400284826755524	male	male	adult		owned	roaming	neutered	healthy	0
858	1.48772631285947	Low	5	residential	0.129744291305542	0.400284826755524	male	male	adult		owned	roaming	entire	healthy	1
859	0.496632499744659	Medium	5	residential	0.0407751202583313	0.178423881530762	male	male	adult		owned	roaming	entire	disease	0
860	0.878542117759448	Medium	5	residential	0.0793020129203796	0.280927658081055	male	male	adult		owned	roaming	entire	healthy	1
861	1.31442303665878	Medium	5	residential	0.0407703518867493	0.209913432598114	female	female	adult	not_preglact	owned	roaming	entire	healthy	0
862	0.256177873025866	High	5	residential	0.0459426641464233	0.185511410236359	unknown	unknown	adult		owned	NA	unknown_neuter	unknown_health	1
863	0.833599105530276	Medium	5	residential	0.0710222125053406	0.274467587471008	male	male	adult		owned	never roaming	entire	healthy	1
864	1.48772631285947	Low	5	residential	0.129744291305542	0.400284826755524	male	male	adult		owned	roaming	entire	healthy	1
865	1.31442303665878	Medium	5	residential	0.0407703518867493	0.209913432598114	female	female	adult	not_preglact	owned	roaming	entire	healthy	0
866	0.231017496760018	High	5	residential	0.059701144695282	0.187464237213135	male	male	adult		owned	roaming	entire	disease	0
867	1.48772631285947	Low	5	residential	0.129744291305542	0.400284826755524	female	female	adult	not_preglact	owned	roaming	entire	healthy	1
868	0.856699443256923	Medium	5	residential	0.0710569620132446	0.23350864648819	female	female	adult	not_preglact	owned	roaming	entire	healthy	0
869	0.254022114233806	High	5	residential	0.0459426641464233	0.185511410236359	unknown	unknown	adult		owned	NA	unknown_neuter	healthy	1
870	1.48772631285947	Low	5	residential	0.129744291305542	0.400284826755524	female	female	adult	not_preglact	owned	roaming	entire	healthy	1
871	0.227416538008764	High	5	residential	0.059701144695282	0.187464237213135	male	male	adult		owned	never roaming	entire	healthy	0
872	0.855909697854386	Medium	5	residential	0.0710569620132446	0.23350864648819	female	female	puppy	not_preglact	owned	roaming	entire	healthy	0
873	0.254022114233806	High	5	residential	0.0459426641464233	0.185511410236359	unknown	unknown	adult		owned	NA	unknown_neuter	unknown_health	1
874	0.751028696459222	Medium	5	residential	0.0531797409057617	0.227031588554382	male	male	adult		owned	never roaming	entire	healthy	0
875	1.48772631285947	Low	5	residential	0.129744291305542	0.400284826755524	female	female	adult	not_preglact	owned	roaming	entire	healthy	1
876	0.193615496767568	High	5	residential	0.0505467057228088	0.20075660943985	male	male	adult		owned	never roaming	entire	healthy	0
877	1.48772631285947	Low	5	residential	0.129744291305542	0.400284826755524	male	male	adult		owned	roaming	entire	healthy	1
878	0.192879336599373	High	5	residential	0.0505467057228088	0.20075660943985	female	female	adult	not_preglact	owned	never roaming	entire	healthy	0
879	0.912043486866991	Medium	5	residential	0.0793020129203796	0.280927658081055	female	female	adult	not_preglact	owned	roaming	entire	disease	0
880	0.856627549535253	Medium	5	residential	0.0710569620132446	0.23350864648819	female	female_preg/lact	adult	yes_preg	owned	never roaming	entire	healthy	1
881	0.980323826392624	Medium	5	residential	0.0710222125053406	0.274467587471008	male	male	adult		owned	roaming	entire	healthy	0
882	0.127788307642662	High	5	residential	0.0578145980834961	0.216015577316284	female	female	adult	not_preglact	owned	NA	entire	healthy	0
883	0.192879336599373	High	5	residential	0.0505467057228088	0.20075660943985	female	female	puppy	not_preglact	owned	never roaming	entire	healthy	1
884	1.47252322433864	Low	5	residential	0.2109414935112	0.512921690940857	female	female	adult	not_preglact	owned	roaming	entire	healthy	0
885	0.856627549535253	Medium	5	residential	0.0710569620132446	0.23350864648819	male	male	adult		owned	roaming	entire	healthy	1
886	0.688375980963841	Medium	5	residential	0.0710569620132446	0.23350864648819	male	male	adult		owned	NA	entire	healthy	0
887	1.53082521121866	Low	5	residential	0.2109414935112	0.512921690940857	male	male	adult		owned	roaming	entire	healthy	0
888	0.904628773844811	Medium	5	residential	0.0793020129203796	0.280927658081055	male	male	adult		owned	roaming	entire	healthy	1
889	1.27910008347491	Medium	5	residential	0.0407703518867493	0.209913432598114	female	female_preg/lact	adult	yes_lact	owned	roaming	entire	healthy	0
890	0.767568132408385	Medium	5	residential	0.0531797409057617	0.227031588554382	male	male	adult		owned	never roaming	entire	healthy	0
891	0.168295681550617	High	5	residential	0.0578145980834961	0.216015577316284	female	female	adult	not_preglact	owned	NA	entire	healthy	0
892	0.904721758177561	Medium	5	residential	0.0793020129203796	0.280927658081055	male	male	adult		owned	roaming	entire	healthy	0
893	0.280296919755021	High	5	residential	0.059701144695282	0.187464237213135	male	male	adult		owned	never roaming	entire	healthy	1
894	1.28052983508325	Medium	5	residential	0.0407703518867493	0.209913432598114	male	male	puppy		owned	roaming	entire	healthy	0
895	0.980133314070775	Medium	5	residential	0.038285493850708	0.228740394115448	female	female_preg/lact	adult	yes_preg	owned	roaming	entire	healthy	1
896	0.904721758177561	Medium	5	residential	0.0793020129203796	0.280927658081055	male	male	adult		owned	roaming	entire	healthy	0
897	0.770863216933001	Medium	5	residential	0.0531797409057617	0.227031588554382	male	male	adult		owned	never roaming	entire	healthy	0
898	0.770630731172121	Medium	5	residential	0.0531797409057617	0.227031588554382	male	male	adult		owned	never roaming	entire	healthy	0
899	0.968478123878745	Medium	5	residential	0.038285493850708	0.228740394115448	male	male	adult		owned	never roaming	entire	healthy	0
900	0.968478123878745	Medium	5	residential	0.038285493850708	0.228740394115448	male	male	adult		owned	never roaming	entire	healthy	0
901	2.32176329488019	Low	3	residential	0.162043690681458	0.441577434539795	female	female	adult	not_preglact	owned	roaming	entire	healthy	0
902	0.980778383485708	Medium	5	residential	0.0710222125053406	0.274467587471008	male	male	adult		owned	never roaming	entire	healthy	0
903	2.32418733325558	Low	3	residential	0.162043690681458	0.441577434539795	female	female	adult	not_preglact	owned	roaming	entire	healthy	0
904	1.00213878838484	Medium	5	residential	0.0793020129203796	0.280927658081055	male	male	adult		owned	roaming	entire	healthy	1
905	0.981985536768917	Medium	5	residential	0.0710222125053406	0.274467587471008	male	male	adult		owned	never roaming	entire	healthy	0
906	2.32418733325558	Low	3	residential	0.162043690681458	0.441577434539795	male	male	puppy		owned	roaming	entire	healthy	0
907	1.27241590384378	Medium	5	residential	0.0407703518867493	0.209913432598114	male	male	adult		owned	roaming	neutered	healthy	0
908	0.982039061326254	Medium	5	residential	0.0710222125053406	0.274467587471008	female	female	adult	not_preglact	owned	never roaming	entire	healthy	0
909	0.964281305988149	Medium	5	residential	0.038285493850708	0.228740394115448	male	male	adult		owned	never roaming	neutered	disease	0
910	2.32442277786313	Low	3	residential	0.162043690681458	0.441577434539795	female	female	puppy	not_preglact	owned	roaming	entire	healthy	0
911	1.27346841672909	Medium	5	residential	0.0407703518867493	0.209913432598114	male	male	adult		owned	roaming	neutered	healthy	0
912	0.159492339706589	High	5	residential	0.0505467057228088	0.20075660943985	male	male	adult		owned	never roaming	entire	healthy	0
913	0.984409714389115	Medium	5	residential	0.0710222125053406	0.274467587471008	male	male	adult		owned	never roaming	entire	healthy	0
914	0.964849563429684	Medium	5	residential	0.038285493850708	0.228740394115448	male	male	adult		owned	never roaming	neutered	disease	0
915	0.84633895652839	Medium	5	residential	0.0531797409057617	0.227031588554382	male	male	adult		owned	never roaming	entire	healthy	0
916	0.327537497361213	High	5	residential	0.059701144695282	0.187464237213135	unknown	unknown	adult		owned	never roaming	unknown_neuter	unknown_health	1
917	0.159492339706589	High	5	residential	0.0505467057228088	0.20075660943985	female	female	adult	not_preglact	owned	never roaming	entire	healthy	0
918	0.964849563429684	Medium	5	residential	0.038285493850708	0.228740394115448	female	female	puppy	not_preglact	owned	never roaming	entire	healthy	0
919	0.328110940200747	High	5	residential	0.059701144695282	0.187464237213135	unknown	unknown	adult		owned	never roaming	unknown_neuter	healthy	1
920	0.15985582715713	High	5	residential	0.0505467057228088	0.20075660943985	male	male	adult		owned	never roaming	entire	healthy	0
921	0.32885266167638	High	5	residential	0.059701144695282	0.187464237213135	unknown	unknown	adult		owned	never roaming	unknown_neuter	unknown_health	1
922	1.64543300649559	Low	5	residential	0.2109414935112	0.512921690940857	male	male	puppy		owned	roaming	entire	healthy	1
923	0.964849563429684	Medium	5	residential	0.038285493850708	0.228740394115448	male	male	puppy		owned	never roaming	entire	healthy	0
924	0.863409117830789	Medium	5	residential	0.0531797409057617	0.227031588554382	male	male	adult		owned	never roaming	neutered	healthy	0
925	1.27436348788763	Medium	5	residential	0.0407703518867493	0.209913432598114	male	male	adult		owned	roaming	entire	healthy	0
926	0.920014324745889	Medium	5	residential	0.0793020129203796	0.280927658081055	female	female	adult	not_preglact	owned	never roaming	entire	healthy	0
927	0.962616085311469	Medium	5	residential	0.038285493850708	0.228740394115448	male	male	puppy		owned	never roaming	entire	healthy	0
928	1.0030235852002	Medium	5	residential	0.0793020129203796	0.280927658081055	male	male	adult		owned	roaming	entire	healthy	1
929	0.962616085311469	Medium	5	residential	0.038285493850708	0.228740394115448	male	male	puppy		owned	never roaming	entire	healthy	0
930	1.62184164612955	Low	5	residential	0.2109414935112	0.512921690940857	male	male	puppy		owned	roaming	entire	healthy	1
931	0.920579090748095	Medium	5	residential	0.0793020129203796	0.280927658081055	female	female	adult	not_preglact	owned	roaming	entire	healthy	0
932	0.966797313402225	Medium	5	residential	0.038285493850708	0.228740394115448	male	male	puppy		owned	never roaming	entire	healthy	1
933	0.920474797836767	Medium	5	residential	0.0793020129203796	0.280927658081055	female	female	puppy	not_preglact	owned	roaming	entire	healthy	0
934	1.27263624416779	Medium	5	residential	0.0407703518867493	0.209913432598114	male	male	adult		owned	roaming	entire	healthy	0
935	2.04336449192502	Low	5	residential	0.131640493869781	0.40896338224411	male	male	adult		owned	roaming	neutered	healthy	0
936	0.92778672611235	Medium	5	residential	0.038285493850708	0.228740394115448	male	male	adult		owned	never roaming	entire	healthy	1
937	0.328748304018716	High	5	residential	0.059701144695282	0.187464237213135	male	male	adult		owned	NA	entire	healthy	0
938	0.828820518940043	Medium	5	residential	0.0531797409057617	0.227031588554382	male	male	adult		owned	never roaming	neutered	healthy	0
939	0.928012129520531	Medium	5	residential	0.038285493850708	0.228740394115448	female	female	adult	not_preglact	owned	never roaming	entire	healthy	1
940	2.04695366222807	Low	5	residential	0.131640493869781	0.40896338224411	male	male	adult		owned	roaming	neutered	healthy	0
941	2.32894096881747	Low	3	residential	0.162043690681458	0.441577434539795	male	male	adult		owned	never roaming	neutered	healthy	0
942	2.04695366222807	Low	5	residential	0.131640493869781	0.40896338224411	female	female_preg/lact	adult	yes_preg	owned	roaming	entire	healthy	0
943	1.19838270335569	Medium	5	residential	0.0407703518867493	0.209913432598114	male	male	adult		owned	roaming	neutered	healthy	1
944	0.730512232525188	Medium	5	residential	0.0463465452194214	0.173745393753052	female	female	adult	not_preglact	owned	NA	entire	healthy	0
945	0.730740835829686	Medium	5	residential	0.0463465452194214	0.173745393753052	male	male	adult		owned	roaming	entire	healthy	0
946	0.828780497331188	Medium	5	residential	0.0531797409057617	0.227031588554382	female	female	adult	not_preglact	owned	NA	entire	healthy	0
947	0.882931432733041	Medium	5	residential	0.0531797409057617	0.227031588554382	male	male	adult		owned	roaming	entire	healthy	0
948	0.319599670411601	High	5	residential	0.059701144695282	0.187464237213135	male	male	adult		owned	NA	unknown_neuter	healthy	0
949	1.73687461338871	Low	5	residential	0.2109414935112	0.512921690940857	female	female	adult	not_preglact	owned	roaming	entire	healthy	0
950	2.05407404091572	Low	5	residential	0.131640493869781	0.40896338224411	male	male	adult		owned	roaming	entire	healthy	0
951	2.05407404091572	Low	5	residential	0.131640493869781	0.40896338224411	male	male	adult		owned	roaming	entire	healthy	0
952	0.982509485227019	Medium	5	residential	0.0793020129203796	0.280927658081055	male	male	adult		owned	roaming	entire	healthy	1
953	0.982509485227019	Medium	5	residential	0.0793020129203796	0.280927658081055	male	male	adult		owned	roaming	entire	healthy	1
954	1.73630579388154	Low	5	residential	0.2109414935112	0.512921690940857	male	male	adult		owned	roaming	entire	healthy	0
955	1.73688617257536	Low	5	residential	0.2109414935112	0.512921690940857	male	male	adult		owned	roaming	entire	healthy	0
956	0.842472540038082	Medium	5	residential	0.0710569620132446	0.23350864648819	male	male	adult		owned	NA	unknown_neuter	healthy	0
957	0.775463854679764	Medium	5	residential	0.0531797409057617	0.227031588554382	female	female	adult	not_preglact	owned	roaming	entire	healthy	0
958	0.965629592434463	Medium	5	residential	0.0793020129203796	0.280927658081055	male	male	adult		owned	roaming	entire	healthy	0
959	1.73329864983583	Low	5	residential	0.2109414935112	0.512921690940857	male	male	adult		owned	roaming	entire	healthy	0
960	2.24814707969206	Low	3	residential	0.162043690681458	0.441577434539795	male	male	adult		owned	never roaming	entire	healthy	0
961	1.73626517946297	Low	5	residential	0.2109414935112	0.512921690940857	male	male	adult		owned	roaming	entire	healthy	0
962	2.23622046162184	Low	3	residential	0.162043690681458	0.441577434539795	female	female	adult	not_preglact	owned	never roaming	entire	healthy	0
963	0.768089632188413	Medium	5	residential	0.0531797409057617	0.227031588554382	male	male	adult		owned	never roaming	neutered	healthy	0
964	0.73270019196564	Medium	5	residential	0.0463465452194214	0.173745393753052	male	male	puppy		owned	roaming	entire	healthy	0
965	0.73270019196564	Medium	5	residential	0.0463465452194214	0.173745393753052	male	male	puppy		owned	roaming	entire	healthy	0
966	2.23301266648879	Low	3	residential	0.162043690681458	0.441577434539795	female	female	adult	not_preglact	owned	never roaming	entire	healthy	0
967	1.10456634001378	Medium	5	residential	0.0531797409057617	0.227031588554382	male	male	adult		owned	roaming	entire	disease	0
968	0.730748151131391	Medium	5	residential	0.0463465452194214	0.173745393753052	female	female	puppy	not_preglact	owned	roaming	entire	healthy	0
969	0.730748151131391	Medium	5	residential	0.0463465452194214	0.173745393753052	female	female	puppy	not_preglact	owned	roaming	entire	healthy	0
970	0.721421132699446	Medium	5	residential	0.0531797409057617	0.227031588554382	male	male	adult		owned	never roaming	entire	healthy	0
971	0.703781006485478	Medium	5	residential	0.0531797409057617	0.227031588554382	male	male	adult		owned	roaming	entire	healthy	0
972	0.733094355405639	Medium	5	residential	0.0463465452194214	0.173745393753052	male	male	puppy		owned	roaming	entire	unknown_health	0
973	1.1038001372765	Medium	5	residential	0.0531797409057617	0.227031588554382	male	male	adult		owned	roaming	entire	healthy	0
974	0.735113416403059	Medium	5	residential	0.0463465452194214	0.173745393753052	female	female	puppy	not_preglact	owned	roaming	entire	healthy	0
975	0.73512379817349	Medium	5	residential	0.0463465452194214	0.173745393753052	male	male	puppy		owned	roaming	entire	healthy	0
976	0.703781006485478	Medium	5	residential	0.0531797409057617	0.227031588554382	male	male	adult		owned	never roaming	neutered	healthy	0
977	0.733326634554513	Medium	5	residential	0.0463465452194214	0.173745393753052	male	male	puppy		owned	roaming	entire	healthy	0
978	1.63279444539607	Low	5	residential	0.129744291305542	0.400284826755524	male	male	adult		owned	roaming	entire	healthy	0
979	0.184897562212467	High	5	residential	0.0543524622917175	0.191298484802246	male	male	puppy		owned	never roaming	entire	healthy	0
980	0.732192053127637	Medium	5	residential	0.0463465452194214	0.173745393753052	male	male	puppy		owned	roaming	entire	healthy	0
981	1.63552672995027	Low	5	residential	0.129744291305542	0.400284826755524	female	female	adult	not_preglact	owned	never roaming	entire	healthy	0
982	0.0201800624943475	High	5	residential	0.0505467057228088	0.20075660943985	male	male	puppy		owned	never roaming	entire	healthy	0
983	2.23300686912519	Low	3	residential	0.162043690681458	0.441577434539795	male	male	adult		owned	never roaming	entire	healthy	0
984	0.737727870083422	Medium	5	residential	0.0463465452194214	0.173745393753052	female	female_preg/lact	adult	yes_lact	owned	roaming	entire	disease	0
985	0.0201800624943475	High	5	residential	0.0505467057228088	0.20075660943985	male	male	puppy		owned	never roaming	entire	healthy	0
986	2.23344612336603	Low	3	residential	0.162043690681458	0.441577434539795	male	male	adult		owned	never roaming	entire	healthy	0
987	0.0201800624943475	High	5	residential	0.0505467057228088	0.20075660943985	male	male	puppy		owned	never roaming	entire	healthy	0
988	1.08741355602167	Medium	5	residential	0.0531797409057617	0.227031588554382	male	male	adult		owned	roaming	entire	healthy	0
989	0.651286269866342	Medium	5	residential	0.0463465452194214	0.173745393753052	male	male	adult		owned	roaming	entire	disease	0
990	2.23268354306484	Low	3	residential	0.162043690681458	0.441577434539795	female	female	adult	not_preglact	owned	never roaming	entire	healthy	0
991	0.0190121701847731	High	5	residential	0.0505467057228088	0.20075660943985	male	male	puppy		owned	never roaming	entire	healthy	0
992	1.05783559125149	Medium	5	residential	0.0531797409057617	0.227031588554382	female	female	adult	not_preglact	owned	roaming	entire	healthy	0
993	0.736647108290072	Medium	5	residential	0.0463465452194214	0.173745393753052	female	female_preg/lact	adult	yes_lact	owned	roaming	entire	disease	0
994	0.734424321392933	Medium	5	residential	0.0531797409057617	0.227031588554382	male	male	adult		owned	roaming	neutered	healthy	0
995	0.73039964727294	Medium	5	residential	0.0463465452194214	0.173745393753052	female	female	adult	not_preglact	owned	NA	entire	healthy	0
996	0.651332819669118	Medium	5	residential	0.0463465452194214	0.173745393753052	male	male	adult		owned	roaming	entire	disease	1
997	1.05576892107685	Medium	5	residential	0.0531797409057617	0.227031588554382	female	female_preg/lact	adult	yes_preg	owned	roaming	entire	healthy	1
998	0.736694330373427	Medium	5	residential	0.0531797409057617	0.227031588554382	male	male	adult		owned	never roaming	neutered	healthy	0
999	0.664322597642216	Medium	5	residential	0.0463465452194214	0.173745393753052	female	female	adult	not_preglact	owned	roaming	entire	healthy	1
1000	0.725996949706774	Medium	5	residential	0.0531797409057617	0.227031588554382	female	female	adult	not_preglact	owned	roaming	entire	disease	0
1001	0.97428097468926	Medium	5	residential	0.0531797409057617	0.227031588554382	male	male	adult		owned	roaming	neutered	unknown_health	1
1002	0.73116250365814	Medium	5	residential	0.0463465452194214	0.173745393753052	female	female	adult	not_preglact	owned	NA	entire	healthy	0
1003	0.66236129108534	Medium	5	residential	0.0463465452194214	0.173745393753052	male	male	adult		owned	roaming	neutered	healthy	1
1004	0.94141540054479	Medium	5	residential	0.0463465452194214	0.173745393753052	male	male	adult		owned	NA	entire	healthy	1
1005	1.63492004794841	Low	5	residential	0.129744291305542	0.400284826755524	male	male	adult		owned	roaming	entire	healthy	0
1006	0.643297135853847	Medium	5	residential	0.0463465452194214	0.173745393753052	female	female	adult	not_preglact	owned	roaming	entire	healthy	1
1007	1.05132973013923	Medium	5	residential	0.0531797409057617	0.227031588554382	male	male	adult		owned	roaming	entire	healthy	0
1008	0.751598872555518	Medium	5	residential	0.0531797409057617	0.227031588554382	male	male	puppy		owned	roaming	entire	disease	0
1009	0.748600845144268	Medium	5	residential	0.0531797409057617	0.227031588554382	male	male	adult		owned	roaming	entire	healthy	0
1010	0.621909807914398	Medium	5	residential	0.0463465452194214	0.173745393753052	male	male	adult		owned	roaming	entire	disease	1
1011	0.601456478583253	Medium	5	residential	0.0463465452194214	0.173745393753052	male	male	adult		owned	roaming	entire	healthy	1
1012	0.764062851883915	Medium	5	residential	0.0531797409057617	0.227031588554382	male	male	adult		owned	never roaming	entire	healthy	0
1013	0.96054758175136	Medium	5	residential	0.0407751202583313	0.178423881530762	female	female	adult	not_preglact	owned	roaming	entire	healthy	0
1014	0.750914830899149	Medium	5	residential	0.0463465452194214	0.173745393753052	male	male	adult		owned	never roaming	entire	disease	0
1015	0.965790901377633	Medium	5	residential	0.0407751202583313	0.178423881530762	male	male	adult		owned	roaming	entire	healthy	0
1016	0.57177241214107	Medium	5	residential	0.0407751202583313	0.178423881530762	male	male	adult		owned	roaming	entire	healthy	1
1017	0.607586453735786	Medium	5	residential	0.0407751202583313	0.178423881530762	female	female	adult	not_preglact	owned	roaming	entire	healthy	1
1018	1.05535769500989	Medium	5	residential	0.0531797409057617	0.227031588554382	male	male	adult		owned	roaming	neutered	healthy	0
1019	0.751782173275623	Medium	5	residential	0.0463465452194214	0.173745393753052	male	male	adult		owned	roaming	entire	healthy	0
1020	0.598945679215096	Medium	5	residential	0.0407751202583313	0.178423881530762	female	female_preg/lact	adult	yes_lact	owned	roaming	entire	disease	1
1021	0.598039402036204	Medium	5	residential	0.0407751202583313	0.178423881530762	male	male	puppy		owned	never roaming	entire	healthy	0
1022	1.63507106285435	Low	5	residential	0.129744291305542	0.400284826755524	male	male	adult		owned	roaming	entire	healthy	0
1023	1.63507106285435	Low	5	residential	0.129744291305542	0.400284826755524	male	male	adult		owned	never roaming	entire	healthy	0
1024	0.596676018123661	Medium	5	residential	0.0407751202583313	0.178423881530762	male	male	puppy		owned	never roaming	entire	healthy	0
1025	1.63507106285435	Low	5	residential	0.129744291305542	0.400284826755524	male	male	adult		owned	roaming	entire	healthy	0
1026	0.795136518177207	Medium	5	residential	0.0531797409057617	0.227031588554382	male	male	adult		owned	never roaming	entire	healthy	0
1027	1.63507106285435	Low	5	residential	0.129744291305542	0.400284826755524	male	male	adult		owned	roaming	entire	healthy	0
1028	0.603948604205103	Medium	5	residential	0.0407751202583313	0.178423881530762	male	male	puppy		owned	never roaming	entire	healthy	0
1029	0.79357265540737	Medium	5	residential	0.0531797409057617	0.227031588554382	male	male	adult		owned	never roaming	entire	healthy	0
1030	0.607391834655992	Medium	5	residential	0.0407751202583313	0.178423881530762	male	male	puppy		owned	never roaming	entire	healthy	0
1031	1.63330580815585	Low	5	residential	0.129744291305542	0.400284826755524	male	male	adult		owned	roaming	entire	healthy	0
1032	0.606067601307006	Medium	5	residential	0.0407751202583313	0.178423881530762	male	male	puppy		owned	never roaming	entire	healthy	0
1033	0.610496922654402	Medium	5	residential	0.0407751202583313	0.178423881530762	male	male	puppy		owned	never roaming	entire	healthy	0
1034	0.589831184002894	Medium	5	residential	0.0407751202583313	0.178423881530762	male	male	puppy		owned	never roaming	entire	healthy	0
1035	0.75215423025323	Medium	5	residential	0.0463465452194214	0.173745393753052	male	male	adult		owned	never roaming	unknown_neuter	unknown_health	1
1036	0.75215423025323	Medium	5	residential	0.0463465452194214	0.173745393753052	female	female	adult	unknown_preglact	owned	never roaming	unknown_neuter	unknown_health	1
1037	0.75215423025323	Medium	5	residential	0.0463465452194214	0.173745393753052	male	male	adult		owned	never roaming	unknown_neuter	unknown_health	1
1038	0.910898188600556	Medium	5	residential	0.0463465452194214	0.173745393753052	female	female	adult	not_preglact	owned	never roaming	entire	healthy	0
1039	0.75215423025323	Medium	5	residential	0.0463465452194214	0.173745393753052	female	female	adult	unknown_preglact	stray	NA	unknown_neuter	unknown_health	1
1040	0.753546007492418	Medium	5	residential	0.0463465452194214	0.173745393753052	male	male	adult		owned	never roaming	unknown_neuter	unknown_health	1
1041	1.05535769500989	Medium	5	residential	0.0531797409057617	0.227031588554382	female	female	adult	not_preglact	owned	roaming	entire	healthy	0
1042	0.911609124623869	Medium	5	residential	0.0463465452194214	0.173745393753052	male	male	puppy		owned	roaming	entire	healthy	0
1043	0.752021111834967	Medium	5	residential	0.0463465452194214	0.173745393753052	female	female	adult	not_preglact	owned	never roaming	entire	healthy	0
1044	0.913219508002303	Medium	5	residential	0.0463465452194214	0.173745393753052	female	female_preg/lact	adult	yes_preg	owned	roaming	entire	healthy	0
1045	0.752098125833765	Medium	5	residential	0.0463465452194214	0.173745393753052	male	male	adult		owned	never roaming	entire	disease	0
1046	1.12031089332688	Medium	5	residential	0.0531797409057617	0.227031588554382	male	male	adult		owned	roaming	neutered	healthy	0
1047	0.875995183692102	Medium	5	residential	0.0407751202583313	0.178423881530762	male	male	adult		owned	roaming	entire	healthy	1
1048	1.2243299490958	Medium	5	residential	0.0407703518867493	0.209913432598114	male	male	adult		owned	roaming	neutered	healthy	0
1049	0.58983408336632	Medium	5	residential	0.0407751202583313	0.178423881530762	female	female	adult	not_preglact	owned	roaming	entire	healthy	1
1050	0.932456332756067	Medium	5	residential	0.0407751202583313	0.178423881530762	male	male	adult		owned	roaming	entire	disease	0
1051	1.08559188084459	Medium	5	residential	0.0531797409057617	0.227031588554382	male	male	adult		owned	roaming	entire	healthy	0
1052	0.715467137421416	Medium	5	residential	0.0463465452194214	0.173745393753052	male	male	adult		owned	never roaming	neutered	healthy	0
1053	0.939304444699597	Medium	5	residential	0.0407751202583313	0.178423881530762	female	female	adult	not_preglact	owned	roaming	entire	healthy	0
1054	0.712891650083768	Medium	5	residential	0.0463465452194214	0.173745393753052	male	male	adult		owned	never roaming	neutered	healthy	0
1055	0.713571738268736	Medium	5	residential	0.0463465452194214	0.173745393753052	male	male	adult		owned	never roaming	neutered	healthy	0
1056	1.23900608909938	Medium	5	residential	0.0407703518867493	0.209913432598114	female	female	adult	not_preglact	owned	roaming	entire	healthy	0
1057	0.940870103559702	Medium	5	residential	0.0407751202583313	0.178423881530762	female	female	adult	not_preglact	owned	roaming	entire	disease	0
1058	0.713481144086523	Medium	5	residential	0.0463465452194214	0.173745393753052	female	female	adult	not_preglact	owned	never roaming	neutered	healthy	0
1059	0.712833111859129	Medium	5	residential	0.0463465452194214	0.173745393753052	female	female	adult	not_preglact	owned	never roaming	neutered	healthy	0
1060	1.14034198283303	Medium	5	residential	0.0531797409057617	0.227031588554382	male	male	adult		owned	roaming	entire	disease	0
1061	0.570892624722157	Medium	5	residential	0.0407751202583313	0.178423881530762	male	male	adult		owned	never roaming	entire	healthy	0
1062	0.712847061811759	Medium	5	residential	0.0463465452194214	0.173745393753052	male	male	adult		owned	never roaming	neutered	healthy	0
1063	1.13674570314644	Medium	5	residential	0.0531797409057617	0.227031588554382	male	male	adult		owned	roaming	entire	disease	0
1064	0.421288228657364	Medium	5	residential	0.0505467057228088	0.20075660943985	male	male	adult		owned	roaming	entire	disease	0
1065	0.579398653366285	Medium	5	residential	0.0407751202583313	0.178423881530762	male	male	adult		owned	never roaming	entire	healthy	0
1066	0.579398653366285	Medium	5	residential	0.0407751202583313	0.178423881530762	male	male	adult		owned	never roaming	entire	healthy	0
1067	0.422410296063284	Medium	5	residential	0.0505467057228088	0.20075660943985	female	female	adult	unknown_preglact	owned	roaming	entire	disease	0
1068	0.815313755619904	Medium	5	NA	0.0463465452194214	0.173745393753052	female	female	adult	not_preglact	owned	never roaming	entire	healthy	0
1069	0.824217714381285	Medium	5	residential	0.038285493850708	0.228740394115448	female	female	adult	not_preglact	owned	roaming	neutered	healthy	0
1070	0.427860079809011	Medium	5	residential	0.0505467057228088	0.20075660943985	male	male	adult		owned	roaming	entire	disease	0
1071	0.58918736853084	Medium	5	residential	0.0407751202583313	0.178423881530762	male	male	adult		owned	never roaming	entire	disease	0
1072	0.868710246874509	High	5	residential	0.0543613433837891	0.180977523326874	male	male	adult		owned	roaming	entire	healthy	1
1073	0.991376368431328	Medium	5	residential	0.0407751202583313	0.178423881530762	female	female_preg/lact	adult	yes_lact	owned	NA	entire	healthy	0
1074	0.584575595146161	Medium	5	residential	0.0407751202583313	0.178423881530762	female	female_preg/lact	adult	yes_lact	owned	never roaming	entire	healthy	1
1075	0.551198314078173	High	5	residential	0.038285493850708	0.228740394115448	female	female_preg/lact	adult	yes_preg	owned	never roaming	entire	healthy	0
1076	0.997586677818799	Medium	5	residential	0.0407751202583313	0.178423881530762	male	male	puppy		owned	NA	entire	healthy	1
1077	0.60363752504482	Medium	5	residential	0.0407751202583313	0.178423881530762	female	female	puppy	not_preglact	owned	never roaming	entire	healthy	1
1078	0.46617598527525	Medium	5	residential	0.0505467057228088	0.20075660943985	male	male	adult		owned	never roaming	neutered	disease	0
1079	0.993752474527731	Medium	5	residential	0.0407751202583313	0.178423881530762	female	female	puppy	not_preglact	owned	roaming	entire	unknown_health	1
1080	0.521249220436605	High	5	residential	0.038285493850708	0.228740394115448	male	male	adult		owned	never roaming	entire	disease	0
1081	0.593205528356415	Medium	5	residential	0.0407751202583313	0.178423881530762	male	male	adult		owned	never roaming	entire	disease	1
1082	0.593205528356415	Medium	5	residential	0.0407751202583313	0.178423881530762	female	female	adult	not_preglact	owned	never roaming	entire	healthy	1
1083	0.799083340823632	Medium	5	NA	0.0463465452194214	0.173745393753052	unknown	unknown	adult		owned	never roaming	unknown_neuter	unknown_health	1
1084	0.815530436987723	Medium	5	NA	0.0463465452194214	0.173745393753052	unknown	unknown	adult		owned	never roaming	unknown_neuter	unknown_health	1
1085	0.593205528356415	Medium	5	residential	0.0407751202583313	0.178423881530762	male	male	adult		owned	roaming	entire	disease	0
1086	0.966613231418361	Medium	5	residential	0.0710222125053406	0.274467587471008	male	male	adult		owned	roaming	entire	healthy	0
1087	0.692725716248841	High	5	residential	0.0543613433837891	0.180977523326874	female	female_preg/lact	adult	yes_lact	owned	roaming	entire	healthy	1
1088	1.03648751044242	Medium	5	residential	0.045224130153656	0.209624946117401	male	male	adult		owned	roaming	entire	healthy	1
1089	1.03747858212308	Medium	5	residential	0.045224130153656	0.209624946117401	male	male	adult		owned	roaming	entire	healthy	1
1090	0.501063726688799	High	5	residential	0.038285493850708	0.228740394115448	male	male	adult		owned	never roaming	neutered	healthy	0
1091	0.648296954082555	High	5	residential	0.0543613433837891	0.180977523326874	female	female	puppy	not_preglact	owned	roaming	entire	healthy	1
1092	1.03585666236482	Medium	5	residential	0.045224130153656	0.209624946117401	female	female	adult	not_preglact	owned	roaming	entire	healthy	1
1093	0.965342958402226	Medium	5	residential	0.0710222125053406	0.274467587471008	female	female	adult	not_preglact	owned	roaming	entire	healthy	0
1094	0.49895002593808	High	5	residential	0.038285493850708	0.228740394115448	male	male	adult		owned	roaming	entire	disease	1
1095	0.661300963182676	Medium	5	residential	0.0407751202583313	0.178423881530762	male	male	adult		owned	roaming	entire	disease	0
1096	0.654347567531587	High	5	residential	0.0543613433837891	0.180977523326874	female	female	adult	not_preglact	owned	never roaming	entire	healthy	0
1097	0.412197706498074	Medium	5	residential	0.0505467057228088	0.20075660943985	male	male	adult		owned	never roaming	neutered	disease	0
1098	0.702236711118625	High	5	residential	0.0543613433837891	0.180977523326874	female	female	adult	not_preglact	owned	never roaming	entire	healthy	0
1099	0.2051776348793	High	5	residential	0.0578145980834961	0.216015577316284	female	female	adult	not_preglact	owned	roaming	entire	healthy	0
1100	0.529461937059012	High	5	residential	0.038285493850708	0.228740394115448	male	male	adult		owned	never roaming	neutered	healthy	1
1101	0.804419630962655	Medium	5	NA	0.0463465452194214	0.173745393753052	male	male	adult		owned	roaming	entire	healthy	0
1102	0.411779699647006	Medium	5	residential	0.0505467057228088	0.20075660943985	male	male	adult		owned	never roaming	neutered	disease	1
1103	0.531926062989555	High	5	residential	0.038285493850708	0.228740394115448	female	female_preg/lact	adult	yes_lact	owned	never roaming	entire	healthy	1
1104	1.09659010247686	Medium	5	residential	0.045224130153656	0.209624946117401	female	female	adult	not_preglact	owned	roaming	entire	healthy	1
1105	0.658547312766414	Medium	5	residential	0.0407751202583313	0.178423881530762	male	male	adult		owned	never roaming	neutered	disease	0
1106	0.530802218196852	High	5	residential	0.038285493850708	0.228740394115448	female	female_preg/lact	adult	yes_lact	owned	never roaming	entire	healthy	1
1107	1.00084886189691	Medium	5	residential	0.0594974160194397	0.233416020870209	male	male	adult		owned	never roaming	entire	healthy	1
1108	0.703671509213231	High	5	residential	0.0543613433837891	0.180977523326874	female	female	puppy	not_preglact	owned	roaming	entire	healthy	0
1109	0.553439814607067	Medium	5	residential	0.0594974160194397	0.233416020870209	male	male	adult		owned	never roaming	entire	healthy	1
1110	0.943711635898841	Medium	5	residential	0.0710222125053406	0.274467587471008	female	female	adult	not_preglact	owned	roaming	entire	healthy	0
1111	0.943754500820093	Medium	5	residential	0.0710222125053406	0.274467587471008	male	male	adult		owned	roaming	entire	healthy	0
1112	0.703971773947625	High	5	residential	0.0543613433837891	0.180977523326874	female	female	adult	not_preglact	owned	roaming	entire	healthy	1
1113	0.531272962765473	High	5	residential	0.038285493850708	0.228740394115448	male	male	adult		owned	roaming	neutered	disease	1
1114	1.16904786176201	Medium	5	residential	0.045224130153656	0.209624946117401	male	male	adult		owned	roaming	entire	disease	0
1115	0.133263736976243	High	5	residential	0.0578145980834961	0.216015577316284	unknown	unknown	adult		owned	never roaming	unknown_neuter	healthy	1
1116	0.731155576712739	High	5	residential	0.0543613433837891	0.180977523326874	male	male	adult		owned	roaming	entire	healthy	1
1117	0.497519955466906	Medium	5	residential	0.0505467057228088	0.20075660943985	male	male	puppy		owned	never roaming	entire	healthy	1
1118	0.52712486169008	High	5	residential	0.038285493850708	0.228740394115448	female	female	adult	not_preglact	owned	roaming	entire	disease	1
1119	1.1667064315659	Medium	5	residential	0.045224130153656	0.209624946117401	female	female	adult	not_preglact	owned	roaming	entire	disease	0
1120	0.564554868940511	Medium	5	residential	0.0594974160194397	0.233416020870209	male	male	adult		owned	never roaming	entire	healthy	0
1121	0.712486804793141	Medium	5	residential	0.0459426641464233	0.185511410236359	female	female	adult	not_preglact	owned	roaming	entire	disease	1
1122	0.823099124800503	Medium	5	residential	0.0463465452194214	0.173745393753052	unknown	unknown	adult		owned	never roaming	unknown_neuter	unknown_health	1
1123	0.65148466000931	Medium	5	residential	0.0407751202583313	0.178423881530762	male	male	puppy		owned	never roaming	entire	healthy	1
1124	0.735455229860971	High	5	residential	0.0543613433837891	0.180977523326874	male	male	adult		owned	never roaming	entire	healthy	0
1125	0.943231968781864	Medium	5	residential	0.0710222125053406	0.274467587471008	female	female_preg/lact	adult	yes_lact	owned	roaming	entire	healthy	0
1126	0.493457968915583	Medium	5	residential	0.0505467057228088	0.20075660943985	female	female	puppy	not_preglact	owned	never roaming	entire	healthy	1
1127	0.658212246726455	Medium	5	residential	0.0407751202583313	0.178423881530762	male	male	puppy		owned	never roaming	entire	healthy	1
1128	0.67728087989865	Medium	5	residential	0.0407751202583313	0.178423881530762	male	male	puppy		owned	never roaming	entire	disease	1
1129	0.945587747952416	Medium	5	residential	0.0710222125053406	0.274467587471008	male	male	puppy		owned	roaming	entire	healthy	0
1130	0.817026599621329	Medium	5	residential	0.0463465452194214	0.173745393753052	male	male	adult		owned	roaming	entire	healthy	0
1131	0.524741331196845	High	5	residential	0.038285493850708	0.228740394115448	female	female	adult	not_preglact	owned	roaming	entire	disease	1
1132	0.690147832308983	Medium	5	residential	0.0407751202583313	0.178423881530762	female	female	adult	not_preglact	owned	never roaming	entire	disease	1
1133	1.04521982366248	Medium	5	residential	0.0710222125053406	0.274467587471008	male	male	adult		owned	never roaming	entire	disease	1
1134	0.945990418291131	Medium	5	residential	0.0710222125053406	0.274467587471008	male	male	puppy		owned	roaming	entire	healthy	0
1135	0.691732205261625	Medium	5	residential	0.0407751202583313	0.178423881530762	female	female	adult	not_preglact	owned	never roaming	entire	healthy	1
1136	0.833605227460569	Medium	5	residential	0.0463465452194214	0.173745393753052	female	female	adult	not_preglact	owned	roaming	entire	healthy	0
1137	0.946103124786332	Medium	5	residential	0.0710222125053406	0.274467587471008	male	male	puppy		owned	roaming	entire	healthy	0
1138	0.495595191696054	High	5	residential	0.038285493850708	0.228740394115448	male	male	adult		owned	never roaming	neutered	healthy	0
1139	0.393704041727944	Medium	5	residential	0.0505467057228088	0.20075660943985	male	male	adult		owned	never roaming	neutered	healthy	1
1140	0.946173682278519	Medium	5	residential	0.0710222125053406	0.274467587471008	female	female	puppy	not_preglact	owned	roaming	entire	healthy	0
1141	0.708708926436957	Medium	5	residential	0.0407751202583313	0.178423881530762	female	female	adult	not_preglact	stray	NA	entire	healthy	1
1142	1.11573215515415	Medium	5	residential	0.045224130153656	0.209624946117401	male	male	adult		owned	roaming	entire	healthy	1
1143	1.11299162993222	Medium	5	residential	0.045224130153656	0.209624946117401	male	male	adult		owned	roaming	entire	unknown_health	1
1144	1.11221024177779	Medium	5	residential	0.045224130153656	0.209624946117401	female	female	adult	not_preglact	owned	roaming	entire	unknown_health	1
1145	0.740068938884336	Medium	5	residential	0.0407751202583313	0.178423881530762	female	female_preg/lact	adult	yes_preg	owned	never roaming	entire	healthy	1
1146	0.752355447485133	Medium	5	residential	0.0407751202583313	0.178423881530762	male	male	adult		owned	roaming	entire	disease	1
1147	0.449048146270769	Medium	5	NA	0.0505467057228088	0.20075660943985	male	male	adult		owned	roaming	entire	healthy	1
1148	0.196561885060343	High	5	residential	0.0578145980834961	0.216015577316284	female	female	adult	not_preglact	owned	never roaming	entire	healthy	0
1149	0.497279755273551	Medium	5	residential	0.0505467057228088	0.20075660943985	male	male	adult		owned	never roaming	entire	healthy	1
1150	0.751196947886221	Medium	5	residential	0.0407751202583313	0.178423881530762	male	male	adult		owned	roaming	entire	healthy	1
1151	0.750594279177165	Medium	5	residential	0.0407751202583313	0.178423881530762	male	male	adult		owned	roaming	entire	disease	1
1152	0.0617472688318405	Low	5	residential	0.121401309967041	0.378434598445892	male	male	adult		owned	roaming	entire	healthy	0
1153	0.131842906635649	High	5	residential	0.0578145980834961	0.216015577316284	male	male	adult		owned	NA	entire	disease	1
1154	0.750788584693235	Medium	5	residential	0.0407751202583313	0.178423881530762	female	female_preg/lact	adult	yes_preg	owned	roaming	entire	healthy	1
1155	0.184884876423152	High	5	residential	0.0578145980834961	0.216015577316284	female	female	adult	not_preglact	owned	never roaming	entire	healthy	1
1156	0.738498443058227	High	5	residential	0.0543613433837891	0.180977523326874	male	male	adult		owned	never roaming	entire	healthy	1
1157	0.16087751839935	High	5	residential	0.0578145980834961	0.216015577316284	female	female	adult	not_preglact	owned	NA	entire	healthy	1
1158	0.0617472688318405	Low	5	residential	0.121401309967041	0.378434598445892	male	male	adult		owned	roaming	entire	disease	0
1159	0.750520834252204	Medium	5	residential	0.0407751202583313	0.178423881530762	female	female_preg/lact	adult	yes_preg	owned	roaming	entire	healthy	1
1160	1.1121669601658	Medium	5	residential	0.045224130153656	0.209624946117401	female	female	adult	not_preglact	owned	roaming	entire	unknown_health	1
1161	0.539943760551656	Medium	5	residential	0.0594974160194397	0.233416020870209	male	male	adult		owned	never roaming	entire	healthy	0
1162	0.184179514332138	High	5	residential	0.0578145980834961	0.216015577316284	male	male	adult		owned	never roaming	entire	healthy	1
1163	0.749336568757883	Medium	5	residential	0.0407751202583313	0.178423881530762	male	male	adult		owned	never roaming	neutered	healthy	1
1164	0.124648527676974	High	5	residential	0.0578145980834961	0.216015577316284	male	male	adult		owned	never roaming	entire	disease	1
1165	0.736584379632802	Medium	5	residential	0.0407751202583313	0.178423881530762	female	female	adult	not_preglact	owned	never roaming	entire	healthy	1
1166	0.16370064104397	High	5	residential	0.0578145980834961	0.216015577316284	male	male	adult		owned	never roaming	entire	healthy	0
1167	0.492073477940626	High	5	residential	0.038285493850708	0.228740394115448	female	female	adult	not_preglact	owned	roaming	entire	disease	0
1168	0.185068710798428	High	5	residential	0.0578145980834961	0.216015577316284	male	male	adult		owned	never roaming	entire	healthy	1
1169	0.11533260007867	High	5	residential	0.0578145980834961	0.216015577316284	female	female	adult	not_preglact	owned	never roaming	entire	disease	0
1170	0.425309068200928	Medium	5	NA	0.0505467057228088	0.20075660943985	female	female	adult	unknown_preglact	owned	roaming	unknown_neuter	healthy	1
1171	0.162931355165964	High	5	residential	0.0578145980834961	0.216015577316284	male	male	adult		owned	never roaming	entire	healthy	0
1172	0.7476438713669	Medium	5	residential	0.0407751202583313	0.178423881530762	female	female	adult	not_preglact	owned	never roaming	entire	healthy	1
1173	0.164531783404687	High	5	residential	0.0578145980834961	0.216015577316284	unknown	unknown	adult		owned	never roaming	unknown_neuter	unknown_health	1
1174	0.747648667495018	Medium	5	residential	0.0407751202583313	0.178423881530762	male	male	puppy		owned	never roaming	entire	healthy	0
1175	0.191600316134823	High	5	residential	0.0578145980834961	0.216015577316284	male	male	adult		owned	never roaming	entire	healthy	1
1176	0.694208083054618	High	5	residential	0.0543613433837891	0.180977523326874	male	male	adult		owned	roaming	entire	healthy	0
1177	0.747086689465529	Medium	5	residential	0.0407751202583313	0.178423881530762	male	male	adult		owned	never roaming	entire	healthy	1
1178	0.205672572004565	High	5	residential	0.0578145980834961	0.216015577316284	female	female	adult	not_preglact	owned	never roaming	entire	healthy	1
1179	0.400846719252797	Medium	5	residential	0.0505467057228088	0.20075660943985	female	female	adult	unknown_preglact	owned	never roaming	entire	disease	0
1180	0.206266977214803	High	5	residential	0.0578145980834961	0.216015577316284	female	female	adult	not_preglact	owned	never roaming	entire	healthy	1
1181	0.886478934015065	Low	5	residential	0.0463465452194214	0.173745393753052	unknown	unknown	adult		owned	NA	unknown_neuter	unknown_health	0
1182	0.747086689465529	Medium	5	residential	0.0407751202583313	0.178423881530762	male	male	adult		owned	never roaming	neutered	healthy	0
1183	0.745648458114019	Medium	5	residential	0.0407751202583313	0.178423881530762	male	male	adult		owned	never roaming	entire	healthy	1
1184	0.441286127721958	Medium	5	residential	0.0594974160194397	0.233416020870209	female	female	adult	not_preglact	owned	never roaming	entire	healthy	0
1185	0.995134701986382	Low	5	residential	0.0463465452194214	0.173745393753052	unknown	unknown	adult		owned	NA	unknown_neuter	unknown_health	0
1186	0.995134701986382	Low	5	residential	0.0463465452194214	0.173745393753052	unknown	unknown	adult		owned	NA	unknown_neuter	unknown_health	0
1187	0.995124587579392	Low	5	residential	0.0463465452194214	0.173745393753052	unknown	unknown	adult		owned	NA	unknown_neuter	unknown_health	0
1188	0.995768970909978	Low	5	residential	0.0463465452194214	0.173745393753052	unknown	unknown	adult		owned	NA	unknown_neuter	unknown_health	0
1189	0.398653383507016	Medium	5	NA	0.0505467057228088	0.20075660943985	male	male	adult		owned	roaming	unknown_neuter	healthy	1
1190	0.995978418464385	Low	5	residential	0.0463465452194214	0.173745393753052	unknown	unknown	adult		owned	NA	unknown_neuter	unknown_health	0
1191	1.15835200184054	Medium	5	residential	0.0594974160194397	0.233416020870209	female	female	adult	not_preglact	owned	roaming	entire	disease	0
1192	0.747354181437366	Medium	5	residential	0.0407751202583313	0.178423881530762	male	male	adult		owned	never roaming	neutered	healthy	0
1193	1.15662829401037	Medium	5	residential	0.0594974160194397	0.233416020870209	male	male	adult		owned	roaming	entire	disease	0
1194	0.694208083054618	High	5	residential	0.0543613433837891	0.180977523326874	female	female_preg/lact	adult	yes_lact	owned	roaming	entire	healthy	0
1195	0.669189403809253	High	5	residential	0.0543613433837891	0.180977523326874	female	female	puppy	not_preglact	owned	roaming	entire	healthy	0
1196	0.469619261560696	Medium	5	residential	0.0505467057228088	0.20075660943985	male	male	adult		owned	never roaming	entire	healthy	1
1197	0.390447788391743	Medium	5	NA	0.0505467057228088	0.20075660943985	male	male	adult		owned	NA	unknown_neuter	unknown_health	1
1198	0.28010723270036	High	5	residential	0.0578145980834961	0.216015577316284	female	female	adult	not_preglact	owned	never roaming	entire	healthy	1
1199	0.143345609030459	High	5	residential	0.0578145980834961	0.216015577316284	male	male	adult		owned	roaming	entire	healthy	1
1200	0.46075987068929	Medium	5	residential	0.0594974160194397	0.233416020870209	male	male	adult		owned	never roaming	entire	healthy	0
1201	1.02650890692667	High	5	residential	0.0463465452194214	0.173745393753052	unknown	unknown	adult		owned	NA	unknown_neuter	unknown_health	0
1202	0.446630937180747	High	5	residential	0.038285493850708	0.228740394115448	male	male	adult		owned	roaming	entire	disease	1
1203	0.460027350024185	Medium	5	residential	0.0594974160194397	0.233416020870209	male	male	adult		owned	never roaming	entire	healthy	0
1204	0.920455798874693	Medium	5	residential	0.0710222125053406	0.274467587471008	male	male	adult		owned	never roaming	entire	healthy	0
1205	0.460027350024185	Medium	5	residential	0.0594974160194397	0.233416020870209	female	female	adult	not_preglact	owned	never roaming	entire	healthy	0
1206	0.290265259128897	High	5	residential	0.0578145980834961	0.216015577316284	female	female	adult	not_preglact	owned	roaming	entire	healthy	1
1207	0.289988199424611	High	5	residential	0.0578145980834961	0.216015577316284	male	male	adult		owned	never roaming	entire	disease	1
1208	0.655468668823467	High	5	residential	0.0543613433837891	0.180977523326874	male	male	adult		owned	never roaming	neutered	healthy	0
1209	0.482258889308299	Medium	5	residential	0.0505467057228088	0.20075660943985	female	female_preg/lact	adult	yes_lact	owned	never roaming	entire	healthy	1
1210	0.471246082845525	High	5	residential	0.038285493850708	0.228740394115448	male	male	adult		owned	roaming	entire	disease	1
1211	1.09927695370555	Medium	5	residential	0.045224130153656	0.209624946117401	unknown	unknown	adult		owned	NA	entire	healthy	1
1212	0.655596799287273	High	5	residential	0.0543613433837891	0.180977523326874	male	male	adult		stray	NA	neutered	healthy	0
1213	0.520182911824894	Medium	5	residential	0.0505467057228088	0.20075660943985	male	male	puppy		owned	never roaming	entire	healthy	1
1214	1.09761198890603	Medium	5	residential	0.045224130153656	0.209624946117401	male	male	adult		owned	NA	entire	unknown_health	1
1215	1.0104413434694	High	5	residential	0.0463465452194214	0.173745393753052	unknown	unknown	adult		owned	NA	unknown_neuter	unknown_health	0
1216	1.01236762042937	High	5	residential	0.0463465452194214	0.173745393753052	unknown	unknown	adult		owned	NA	unknown_neuter	unknown_health	0
1217	0.655596799287273	High	5	residential	0.0543613433837891	0.180977523326874	male	male	adult		stray	NA	neutered	healthy	0
1218	0.655596799287273	High	5	residential	0.0543613433837891	0.180977523326874	male	male	adult		stray	NA	neutered	healthy	0
1219	0.771272648636785	Medium	5	residential	0.0531797409057617	0.227031588554382	male	male	puppy		owned	roaming	entire	healthy	0
1220	0.347926269525	High	5	residential	0.0578145980834961	0.216015577316284	male	male	adult		owned	never roaming	entire	healthy	1
1221	0.54174407854398	Medium	5	residential	0.0594974160194397	0.233416020870209	male	male	puppy		owned	never roaming	entire	healthy	1
1222	0.416530570522763	High	5	residential	0.038285493850708	0.228740394115448	male	male	adult		owned	roaming	entire	healthy	1
1223	0.289055745527985	High	5	residential	0.0578145980834961	0.216015577316284	unknown	unknown	adult		owned	NA	unknown_neuter	unknown_health	1
1224	0.742515002625125	Medium	5	residential	0.0407751202583313	0.178423881530762	male	male	adult		owned	never roaming	neutered	healthy	0
1225	0.719711627547055	Medium	5	residential	0.0531797409057617	0.227031588554382	male	male	adult		owned	roaming	neutered	healthy	0
1226	0.853030870439271	Medium	5	residential	0.0531797409057617	0.227031588554382	male	male	adult		owned	never roaming	neutered	healthy	0
1227	1.21638368217498	Medium	3	residential	0.045224130153656	0.209624946117401	female	female_preg/lact	adult	yes_preg	owned	roaming	entire	healthy	0
1228	0.361054111631561	Medium	5	residential	0.0505467057228088	0.20075660943985	male	male	adult		owned	never roaming	neutered	healthy	1
1229	0.71870139223786	Medium	5	residential	0.0531797409057617	0.227031588554382	female	female	adult	not_preglact	owned	roaming	entire	healthy	0
1230	0.82757900193867	Medium	5	residential	0.0407751202583313	0.178423881530762	female	female	adult	not_preglact	owned	never roaming	entire	healthy	0
1231	0.286064105570775	High	5	residential	0.0578145980834961	0.216015577316284	male	male	adult		owned	never roaming	entire	disease	1
1232	1.15835561940618	Medium	5	residential	0.0594974160194397	0.233416020870209	male	male	adult		owned	roaming	entire	disease	0
1233	0.300847020129136	High	5	residential	0.0578145980834961	0.216015577316284	male	male	adult		owned	never roaming	entire	healthy	1
1234	1.80202374445699	Low	3	residential	0.2109414935112	0.512921690940857	male	male	adult		owned	roaming	neutered	healthy	0
1235	0.71870139223786	Medium	5	residential	0.0531797409057617	0.227031588554382	female	female	puppy	not_preglact	owned	roaming	entire	healthy	0
1236	1.01314331531767	High	5	residential	0.0463465452194214	0.173745393753052	unknown	unknown	adult		owned	NA	unknown_neuter	unknown_health	1
1237	0.726975278042182	Medium	5	residential	0.0710222125053406	0.274467587471008	male	male	adult		owned	never roaming	unknown_neuter	unknown_health	1
1238	0.406148719736864	High	5	residential	0.0578145980834961	0.216015577316284	male	male	adult		owned	never roaming	entire	healthy	1
1239	0.562441107885532	High	5	residential	0.0543613433837891	0.180977523326874	male	male	adult		owned	roaming	entire	healthy	0
1240	1.80640250394561	Low	3	residential	0.2109414935112	0.512921690940857	female	female_preg/lact	adult	yes_preg	owned	roaming	entire	healthy	0
1241	0.283346203829458	High	5	residential	0.0578145980834961	0.216015577316284	male	male	adult		owned	roaming	entire	disease	1
1242	0.324919665505853	High	5	residential	0.0578145980834961	0.216015577316284	male	male	adult		owned	never roaming	entire	healthy	1
1243	1.80264842019367	Low	5	residential	0.2109414935112	0.512921690940857	male	male	adult		owned	roaming	entire	healthy	0
1244	0.40670786660701	High	5	residential	0.0578145980834961	0.216015577316284	female	female	adult	not_preglact	owned	never roaming	entire	healthy	1
1245	0.435307699791594	High	5	residential	0.038285493850708	0.228740394115448	female	female	adult	not_preglact	owned	roaming	entire	disease	0
1246	2.20854297024481	Low	3	residential	0.162043690681458	0.441577434539795	male	male	adult		owned	roaming	entire	disease	0
1247	0.584202744924716	Medium	5	residential	0.0594974160194397	0.233416020870209	female	female	puppy	not_preglact	owned	never roaming	entire	healthy	1
1248	0.324878641872292	Medium	5	residential	0.0546601414680481	0.231228411197662	unknown	unknown	adult		owned	NA	unknown_neuter	healthy	1
1249	0.559605744804624	Medium	5	residential	0.0505467057228088	0.20075660943985	female	female_preg/lact	adult	yes_lact	owned	never roaming	entire	healthy	1
1250	2.21475897588803	Low	3	residential	0.162043690681458	0.441577434539795	female	female	adult	not_preglact	owned	roaming	entire	healthy	0
1251	0.725271276255857	Medium	5	residential	0.0531797409057617	0.227031588554382	female	female	adult	not_preglact	owned	roaming	entire	healthy	0
1252	0.568622022284166	Medium	5	residential	0.0505467057228088	0.20075660943985	male	male	puppy		owned	never roaming	entire	healthy	1
1253	1.80255277415628	Low	5	residential	0.2109414935112	0.512921690940857	male	male	adult		owned	NA	unknown_neuter	unknown_health	0
1254	0.314668858215831	Medium	5	residential	0.0505467057228088	0.20075660943985	male	male	adult		owned	never roaming	neutered	healthy	1
1255	0.739473495252545	Medium	5	residential	0.0531797409057617	0.227031588554382	male	male	adult		owned	roaming	entire	healthy	0
1256	1.20247234413448	Medium	5	residential	0.0594974160194397	0.233416020870209	female	female_preg/lact	adult	yes_lact	owned	never roaming	entire	disease	0
1257	2.21515702707439	Low	3	residential	0.162043690681458	0.441577434539795	male	male	adult		owned	roaming	entire	disease	0
1258	0.580315628897058	Medium	5	residential	0.0505467057228088	0.20075660943985	male	male	puppy		owned	never roaming	entire	healthy	1
1259	0.584202744924716	Medium	5	residential	0.0594974160194397	0.233416020870209	female	female	adult	not_preglact	owned	never roaming	neutered	healthy	0
1260	0.348088907960767	High	5	residential	0.0578145980834961	0.216015577316284	male	male	adult		owned	never roaming	neutered	healthy	0
1261	0.303130144757727	Medium	5	residential	0.0505467057228088	0.20075660943985	male	male	adult		owned	roaming	neutered	disease	1
1262	0.498407272848777	High	5	residential	0.038285493850708	0.228740394115448	female	female	adult	not_preglact	owned	never roaming	entire	disease	0
1263	0.610210111937891	Medium	5	residential	0.0459426641464233	0.185511410236359	female	female	puppy	not_preglact	owned	never roaming	entire	healthy	1
1264	0.318377870617085	Medium	5	residential	0.0546601414680481	0.231228411197662	unknown	unknown	adult		owned	NA	unknown_neuter	unknown_health	1
1265	0.413061174764056	High	5	residential	0.0578145980834961	0.216015577316284	female	female	adult	not_preglact	owned	never roaming	entire	healthy	1
1266	1.20146933865777	Medium	5	residential	0.0594974160194397	0.233416020870209	male	male	puppy		owned	never roaming	entire	healthy	0
1267	0.227595794964013	Medium	5	residential	0.0546601414680481	0.231228411197662	male	male	adult		owned	never roaming	entire	healthy	1
1268	0.994346334331292	High	5	residential	0.0463465452194214	0.173745393753052	unknown	unknown	adult		owned	NA	unknown_neuter	unknown_health	1
1269	0.344094745908824	Medium	5	residential	0.0710569620132446	0.23350864648819	female	female	adult	not_preglact	owned	roaming	entire	healthy	0
1270	2.21347077325371	Low	3	residential	0.162043690681458	0.441577434539795	male	male	adult		owned	roaming	entire	disease	0
1271	1.20198409264966	Medium	5	residential	0.0594974160194397	0.233416020870209	male	male	puppy		owned	never roaming	entire	healthy	0
1272	0.555934106218939	High	5	residential	0.0543613433837891	0.180977523326874	male	male	puppy		owned	roaming	entire	healthy	0
1273	0.630924608716643	Medium	5	residential	0.0459426641464233	0.185511410236359	female	female	adult	not_preglact	owned	never roaming	entire	healthy	0
1274	0.994346334331292	High	5	residential	0.0463465452194214	0.173745393753052	unknown	unknown	adult		owned	NA	unknown_neuter	unknown_health	1
1275	1.20231067637584	Medium	5	residential	0.0594974160194397	0.233416020870209	male	male	puppy		owned	never roaming	entire	healthy	0
1276	0.577011815081813	High	5	residential	0.0543613433837891	0.180977523326874	male	male	puppy		owned	roaming	entire	healthy	0
1277	0.577011815081813	High	5	residential	0.0543613433837891	0.180977523326874	male	male	puppy		owned	roaming	entire	healthy	0
1278	0.814004310834325	Medium	5	residential	0.0407751202583313	0.178423881530762	female	female	adult	not_preglact	owned	never roaming	entire	healthy	1
1279	0.577011815081813	High	5	residential	0.0543613433837891	0.180977523326874	female	female	adult	not_preglact	owned	roaming	entire	healthy	0
1280	1.19927958622959	Medium	5	residential	0.0594974160194397	0.233416020870209	female	female	puppy	not_preglact	owned	never roaming	entire	healthy	0
1281	0.216690088620693	Medium	5	residential	0.0546601414680481	0.231228411197662	male	male	adult		owned	never roaming	entire	healthy	1
1282	1.20365056342586	Medium	5	residential	0.0594974160194397	0.233416020870209	female	female	puppy	not_preglact	owned	never roaming	entire	healthy	0
1283	0.308379525424267	Medium	5	residential	0.0505467057228088	0.20075660943985	male	male	adult		owned	roaming	entire	unknown_health	1
1284	0.563210622557999	High	5	residential	0.0543613433837891	0.180977523326874	female	female	puppy	not_preglact	owned	roaming	entire	healthy	1
1285	0.369914807357206	High	5	residential	0.0578145980834961	0.216015577316284	male	male	adult		owned	roaming	entire	healthy	1
1286	0.891185090981513	Medium	5	residential	0.0531797409057617	0.227031588554382	male	male	adult		owned	never roaming	entire	healthy	0
1287	0.372013105976046	Medium	5	residential	0.0710569620132446	0.23350864648819	female	female	adult	not_preglact	owned	roaming	entire	disease	1
1288	0.372013105976046	Medium	5	residential	0.0710569620132446	0.23350864648819	female	female	adult	not_preglact	owned	roaming	entire	disease	1
1289	1.2023954013181	Medium	5	residential	0.0594974160194397	0.233416020870209	female	female	puppy	not_preglact	owned	never roaming	entire	healthy	0
1290	0.369914807357206	High	5	residential	0.0578145980834961	0.216015577316284	male	male	adult		owned	roaming	entire	disease	1
1291	0.629142209451403	Medium	5	residential	0.0594974160194397	0.233416020870209	male	male	puppy		owned	never roaming	entire	healthy	0
1292	1.20256734068752	Medium	5	residential	0.0594974160194397	0.233416020870209	female	female	puppy	not_preglact	owned	never roaming	entire	healthy	0
1293	0.743900167232991	Medium	5	residential	0.0670018196105957	0.28293651342392	female	female	adult	not_preglact	owned	roaming	entire	healthy	0
1294	0.711136117129266	Medium	5	residential	0.0531797409057617	0.227031588554382	male	male	adult		owned	roaming	entire	healthy	0
1295	0.324438089259262	Medium	5	residential	0.0505467057228088	0.20075660943985	male	male	adult		owned	never roaming	entire	healthy	1
1296	1.15355160542844	Medium	5	residential	0.045224130153656	0.209624946117401	male	male	adult		owned	NA	entire	unknown_health	1
1297	0.994044966216531	High	5	residential	0.0463465452194214	0.173745393753052	male	male	adult		owned	never roaming	neutered	healthy	0
1298	0.764580411044712	Medium	5	residential	0.0407751202583313	0.178423881530762	female	female	adult	not_preglact	owned	never roaming	entire	healthy	1
1299	0.407932563060714	High	5	residential	0.0578145980834961	0.216015577316284	female	female	adult	not_preglact	owned	never roaming	entire	healthy	1
1300	0.373664600030343	Medium	5	residential	0.0710569620132446	0.23350864648819	male	male	adult		owned	roaming	entire	healthy	1
1301	0.99870932084059	Medium	5	residential	0.0710222125053406	0.274467587471008	male	male	adult		owned	never roaming	unknown_neuter	healthy	0
1302	1.93526875060629	Low	5	residential	0.129744291305542	0.400284826755524	male	male	adult		owned	roaming	entire	healthy	0
1303	0.3794079465099	High	5	residential	0.0578145980834961	0.216015577316284	male	male	adult		owned	roaming	entire	healthy	0
1304	1.20367534233475	Medium	5	residential	0.0594974160194397	0.233416020870209	male	male	adult		owned	never roaming	entire	healthy	0
1305	1.93450681900402	Low	5	residential	0.129744291305542	0.400284826755524	female	female	adult	not_preglact	owned	roaming	entire	healthy	0
1306	1.88681497802176	Low	3	residential	0.192088603973389	0.484618902206421	male	male	adult		owned	roaming	entire	healthy	1
1307	0.958947356867403	Medium	5	residential	0.0531797409057617	0.227031588554382	male	male	adult		owned	never roaming	entire	healthy	0
1308	0.374338350357422	Medium	5	residential	0.0710569620132446	0.23350864648819	unknown	unknown	adult		owned	NA	unknown_neuter	unknown_health	1
1309	0.517106315912443	High	5	residential	0.0543613433837891	0.180977523326874	male	male	adult		owned	roaming	entire	healthy	1
1310	0.313694443017471	Medium	5	residential	0.0505467057228088	0.20075660943985	male	male	adult		owned	never roaming	neutered	healthy	1
1311	0.992986055954904	High	5	residential	0.0463465452194214	0.173745393753052	male	male	adult		owned	never roaming	unknown_neuter	unknown_health	1
1312	0.743989835527134	Medium	5	residential	0.0670018196105957	0.28293651342392	male	male	adult		owned	roaming	neutered	healthy	1
1313	0.50673283302305	High	5	residential	0.0578145980834961	0.216015577316284	male	male	adult		owned	never roaming	entire	healthy	1
1314	0.310256389823158	Medium	5	residential	0.0505467057228088	0.20075660943985	unknown	unknown	adult		owned	NA	unknown_neuter	unknown_health	0
1315	1.94963594916635	Low	5	residential	0.129744291305542	0.400284826755524	male	male	adult		owned	roaming	neutered	healthy	1
1316	2.02781933939566	Low	3	residential	0.192088603973389	0.484618902206421	male	male	adult		owned	roaming	entire	healthy	1
1317	0.991257817401849	High	5	residential	0.0463465452194214	0.173745393753052	male	male	adult		owned	never roaming	unknown_neuter	unknown_health	1
1318	0.504085763495868	High	5	residential	0.0578145980834961	0.216015577316284	male	male	adult		owned	never roaming	entire	healthy	1
1319	2.02849661643474	Low	3	residential	0.192088603973389	0.484618902206421	female	female	adult	not_preglact	owned	roaming	entire	healthy	0
1320	0.537255027064248	High	5	residential	0.0543613433837891	0.180977523326874	male	male	adult		owned	roaming	entire	healthy	1
1321	0.537255027064248	High	5	residential	0.0543613433837891	0.180977523326874	male	male	adult		owned	roaming	entire	healthy	1
1322	0.702631577988792	Medium	5	residential	0.0594974160194397	0.233416020870209	male	male	puppy		owned	never roaming	entire	healthy	0
1323	0.697890260822474	Medium	5	residential	0.0531797409057617	0.227031588554382	female	female	adult	not_preglact	owned	roaming	entire	healthy	0
1324	0.506395415242523	High	5	residential	0.0578145980834961	0.216015577316284	male	male	adult		owned	roaming	neutered	healthy	0
1325	0.583338325775386	High	5	residential	0.0578145980834961	0.216015577316284	female	female	adult	not_preglact	owned	never roaming	unknown_neuter	healthy	0
1326	0.702631577988792	Medium	5	residential	0.0594974160194397	0.233416020870209	male	male	puppy		owned	never roaming	entire	healthy	0
1327	0.673206515073518	Medium	5	residential	0.0459426641464233	0.185511410236359	female	female	adult	not_preglact	owned	never roaming	entire	healthy	0
1328	0.70195887281226	Medium	5	residential	0.0594974160194397	0.233416020870209	male	male	puppy		owned	never roaming	entire	healthy	0
1329	0.327335142266146	Medium	5	residential	0.0505467057228088	0.20075660943985	female	female	adult	unknown_preglact	owned	roaming	entire	disease	0
1330	0.703703802765732	Medium	5	residential	0.0594974160194397	0.233416020870209	female	female	puppy	not_preglact	owned	never roaming	entire	healthy	0
1331	0.721005315929984	Medium	5	residential	0.0670018196105957	0.28293651342392	male	male	adult		owned	roaming	entire	healthy	1
1332	0.704121665759212	Medium	5	residential	0.0594974160194397	0.233416020870209	female	female	puppy	not_preglact	owned	never roaming	entire	healthy	0
1333	0.939576656876022	Medium	5	residential	0.0407751202583313	0.178423881530762	male	male	adult		owned	roaming	entire	healthy	1
1334	0.477526460170345	High	5	residential	0.0578145980834961	0.216015577316284	female	female	adult	not_preglact	owned	roaming	entire	disease	1
1335	0.704121665759212	Medium	5	residential	0.0594974160194397	0.233416020870209	female	female	puppy	not_preglact	owned	never roaming	entire	healthy	0
1336	0.718008609720511	Medium	5	residential	0.0407751202583313	0.178423881530762	male	male	adult		owned	never roaming	entire	healthy	0
1337	0.940498321214453	Medium	5	residential	0.0407751202583313	0.178423881530762	female	female	adult	not_preglact	owned	roaming	entire	unknown_health	1
1338	0.703677040257093	Medium	5	residential	0.0594974160194397	0.233416020870209	female	female	puppy	not_preglact	owned	never roaming	entire	healthy	0
1339	0.586592487662104	High	5	residential	0.038285493850708	0.228740394115448	male	male	adult		owned	roaming	entire	disease	0
1340	0.295667696726619	Medium	5	residential	0.0710569620132446	0.23350864648819	male	male	adult		stray	NA	unknown_neuter	healthy	1
1341	0.71594562539964	Medium	5	residential	0.0670018196105957	0.28293651342392	female	female	adult	not_preglact	owned	roaming	entire	healthy	1
1342	0.508628562686498	High	5	residential	0.0578145980834961	0.216015577316284	male	male	adult		owned	never roaming	entire	healthy	1
1343	0.582994176164059	High	5	residential	0.0578145980834961	0.216015577316284	male	male	adult		owned	never roaming	entire	healthy	0
1344	0.991096642169624	High	5	residential	0.0463465452194214	0.173745393753052	male	male	adult		owned	never roaming	entire	disease	0
1345	0.703677040257093	Medium	5	residential	0.0594974160194397	0.233416020870209	female	female	puppy	not_preglact	owned	never roaming	entire	healthy	0
1346	0.939253144322216	Medium	5	residential	0.0407751202583313	0.178423881530762	male	male	adult		owned	roaming	entire	unknown_health	1
1347	2.22925704265346	Low	3	residential	0.162043690681458	0.441577434539795	male	male	adult		owned	roaming	neutered	healthy	1
1348	0.344413912999602	Medium	5	residential	0.0710569620132446	0.23350864648819	female	female	puppy	not_preglact	owned	never roaming	entire	disease	0
1349	0.813578742091406	Medium	5	residential	0.0531797409057617	0.227031588554382	male	male	adult		owned	never roaming	entire	healthy	0
1350	0.521524746797113	High	5	residential	0.0578145980834961	0.216015577316284	male	male	adult		owned	roaming	entire	disease	1
1351	0.66810858522871	Medium	5	residential	0.0531797409057617	0.227031588554382	male	male	adult		owned	roaming	entire	healthy	0
1352	0.368001993100256	Medium	5	residential	0.0505467057228088	0.20075660943985	female	female	adult	unknown_preglact	owned	roaming	entire	disease	1
1353	2.25970827034963	Low	3	residential	0.162043690681458	0.441577434539795	male	male	adult		owned	roaming	neutered	healthy	1
1354	0.813578742091406	Medium	5	residential	0.0531797409057617	0.227031588554382	male	male	adult		owned	never roaming	entire	healthy	0
1355	0.717767625259875	Medium	5	residential	0.0407751202583313	0.178423881530762	male	male	adult		owned	never roaming	entire	healthy	0
1356	0.715466457714147	Medium	5	residential	0.0670018196105957	0.28293651342392	female	female	adult	not_preglact	owned	roaming	entire	unknown_health	1
1357	2.25465774565523	Low	3	residential	0.162043690681458	0.441577434539795	male	male	adult		owned	roaming	entire	healthy	1
1358	1.05042349732748	High	5	residential	0.0463465452194214	0.173745393753052	male	male	adult		owned	never roaming	entire	disease	0
1359	0.365134101861435	Medium	5	residential	0.0505467057228088	0.20075660943985	male	male	adult		owned	roaming	entire	healthy	1
1360	0.581071892648367	High	5	residential	0.0578145980834961	0.216015577316284	male	male	adult		owned	never roaming	entire	disease	0
1361	1.05179237670385	High	5	residential	0.0463465452194214	0.173745393753052	male	male	adult		owned	never roaming	entire	unknown_health	0
1362	0.715610556440793	Medium	5	residential	0.0670018196105957	0.28293651342392	female	female	adult	not_preglact	owned	roaming	entire	unknown_health	1
1363	0.371902933874702	Medium	5	residential	0.0505467057228088	0.20075660943985	male	male	adult		owned	roaming	entire	healthy	1
1364	0.717485158795561	Medium	5	residential	0.0407751202583313	0.178423881530762	male	male	adult		owned	roaming	neutered	disease	0
1365	0.522131528373955	High	5	residential	0.0620661377906799	0.245069324970245	female	female	adult	not_preglact	owned	roaming	entire	healthy	1
1366	0.672970687828411	Medium	5	residential	0.0531797409057617	0.227031588554382	male	male	adult		owned	roaming	unknown_neuter	unknown_health	1
1367	0.525223579538582	High	5	residential	0.0620661377906799	0.245069324970245	male	male	adult		owned	roaming	entire	healthy	1
1368	1.9414688757211	Low	5	residential	0.129744291305542	0.400284826755524	male	male	adult		owned	roaming	neutered	healthy	0
1369	0.397209500506715	Medium	5	residential	0.0710569620132446	0.23350864648819	female	female_preg/lact	adult	yes_lact	owned	NA	entire	disease	1
1370	0.553502235800255	High	5	residential	0.0620661377906799	0.245069324970245	female	female	adult	not_preglact	owned	roaming	entire	disease	1
1371	0.566260465422875	High	5	residential	0.038285493850708	0.228740394115448	female	female	adult	not_preglact	owned	never roaming	entire	disease	0
1372	0.76829738736064	Medium	5	residential	0.0670018196105957	0.28293651342392	male	male	adult		stray	NA	unknown_neuter	unknown_health	0
1373	0.371110957239815	Medium	5	residential	0.0505467057228088	0.20075660943985	male	male	adult		owned	never roaming	entire	healthy	0
1374	1.92159402437336	Low	5	residential	0.129744291305542	0.400284826755524	male	male	adult		owned	roaming	neutered	healthy	0
1375	0.44610142251239	Medium	5	residential	0.0710569620132446	0.23350864648819	female	female_preg/lact	adult	yes_preg	owned	roaming	entire	healthy	0
1376	0.554659001966235	Medium	5	residential	0.0459426641464233	0.185511410236359	male	male	puppy		owned	never roaming	entire	healthy	0
1377	0.726975278042182	Medium	5	residential	0.0710222125053406	0.274467587471008	male	male	adult		owned	roaming	entire	healthy	0
1378	0.725597959301092	Medium	5	residential	0.0407751202583313	0.178423881530762	female	female	puppy	not_preglact	owned	roaming	entire	disease	1
1379	1.92159402437336	Low	5	residential	0.129744291305542	0.400284826755524	male	male	adult		owned	roaming	neutered	healthy	0
1380	0.576310842695376	High	5	residential	0.038285493850708	0.228740394115448	female	female	adult	not_preglact	owned	never roaming	entire	disease	0
1381	0.369796864544329	Medium	5	residential	0.0505467057228088	0.20075660943985	male	male	adult		owned	roaming	entire	healthy	1
1382	0.581698451110646	High	5	residential	0.0620661377906799	0.245069324970245	male	male	adult		owned	never roaming	entire	disease	0
1383	0.703677040257093	Medium	5	residential	0.0594974160194397	0.233416020870209	male	male	adult		owned	never roaming	entire	healthy	0
1384	0.364427290011812	Medium	5	residential	0.0505467057228088	0.20075660943985	male	male	adult		owned	roaming	entire	unknown_health	1
1385	0.358736508050817	Medium	5	residential	0.0546601414680481	0.231228411197662	male	male	adult		owned	roaming	entire	healthy	0
1386	0.610065373979386	High	5	residential	0.038285493850708	0.228740394115448	female	female	adult	not_preglact	owned	roaming	entire	healthy	1
1387	0.740484152533197	Medium	5	residential	0.0670018196105957	0.28293651342392	male	male	adult		owned	roaming	entire	healthy	0
1388	0.562802253979001	Medium	5	residential	0.0459426641464233	0.185511410236359	male	male	adult		owned	never roaming	entire	healthy	0
1389	0.637483099608006	Medium	5	residential	0.0531797409057617	0.227031588554382	male	male	puppy		owned	never roaming	entire	unknown_health	1
1390	0.546051313192131	High	5	residential	0.0578145980834961	0.216015577316284	male	male	adult		owned	roaming	entire	disease	1
1391	2.27078339695553	Low	3	residential	0.162043690681458	0.441577434539795	male	male	adult		owned	never roaming	neutered	healthy	0
1392	1.01166443908946	High	5	residential	0.0463465452194214	0.173745393753052	female	female	adult	unknown_preglact	owned	roaming	unknown_neuter	unknown_health	1
1393	0.583391070734414	Medium	5	residential	0.0531797409057617	0.227031588554382	male	male	puppy		owned	NA	entire	unknown_health	1
1394	0.571229405692485	Medium	5	residential	0.0459426641464233	0.185511410236359	female	female	adult	not_preglact	owned	never roaming	entire	healthy	0
1395	0.411914971923267	Medium	5	residential	0.0710569620132446	0.23350864648819	unknown	unknown	adult		owned	NA	unknown_neuter	healthy	1
1396	0.584112448877122	Medium	5	residential	0.0531797409057617	0.227031588554382	female	female	puppy	not_preglact	owned	NA	entire	unknown_health	1
1397	0.718055188193338	Medium	5	residential	0.0407751202583313	0.178423881530762	male	male	adult		owned	never roaming	neutered	healthy	1
1398	0.504342358173918	High	5	residential	0.0543613433837891	0.180977523326874	female	female	adult	not_preglact	owned	roaming	neutered	healthy	1
1399	0.57138646799205	Medium	5	residential	0.0459426641464233	0.185511410236359	female	female	adult	not_preglact	owned	never roaming	entire	healthy	0
1400	0.680853962512451	Medium	5	residential	0.0407751202583313	0.178423881530762	male	male	adult		owned	never roaming	entire	healthy	1
1401	1.10965041247478	High	5	residential	0.0463465452194214	0.173745393753052	female	female	adult	unknown_preglact	owned	never roaming	unknown_neuter	unknown_health	1
1402	0.584112448877122	Medium	5	residential	0.0531797409057617	0.227031588554382	female	female	puppy	not_preglact	owned	NA	entire	unknown_health	1
1403	0.572410147074305	Medium	5	residential	0.0459426641464233	0.185511410236359	female	female	adult	not_preglact	owned	never roaming	entire	healthy	0
1404	0.584112448877122	Medium	5	residential	0.0531797409057617	0.227031588554382	female	female	puppy	not_preglact	owned	NA	entire	unknown_health	1
1405	1.09965186153599	High	5	residential	0.0463465452194214	0.173745393753052	female	female	adult	unknown_preglact	owned	never roaming	unknown_neuter	unknown_health	1
1406	0.584112448877122	Medium	5	residential	0.0531797409057617	0.227031588554382	female	female	puppy	not_preglact	owned	NA	entire	unknown_health	1
1407	1.19466031764504	Medium	5	residential	0.0710222125053406	0.274467587471008	female	female	adult	not_preglact	owned	roaming	entire	healthy	0
1408	0.888520721190413	Medium	5	residential	0.0594974160194397	0.233416020870209	female	female	adult	not_preglact	owned	never roaming	entire	healthy	0
1409	2.25461591127096	Low	3	residential	0.162043690681458	0.441577434539795	male	male	adult		owned	never roaming	entire	disease	0
1410	0.584112448877122	Medium	5	residential	0.0531797409057617	0.227031588554382	male	male	adult		owned	roaming	entire	healthy	0
1411	0.559896907976781	High	5	residential	0.0578145980834961	0.216015577316284	male	male	adult		owned	never roaming	unknown_neuter	healthy	1
1412	0.559896907976781	High	5	residential	0.0578145980834961	0.216015577316284	male	male	adult		owned	never roaming	unknown_neuter	healthy	1
1413	0.680959959938697	Medium	5	residential	0.0407751202583313	0.178423881530762	male	male	adult		owned	never roaming	entire	healthy	1
1414	1.10904287489278	High	5	residential	0.0463465452194214	0.173745393753052	male	male	adult		owned	never roaming	unknown_neuter	unknown_health	1
1415	0.648354071107969	Medium	5	residential	0.0407751202583313	0.178423881530762	male	male	adult		owned	never roaming	entire	disease	0
1416	0.738326661438175	Medium	5	residential	0.0670018196105957	0.28293651342392	female	female	adult	not_preglact	owned	roaming	entire	healthy	0
1417	0.602793590789925	High	5	residential	0.0578145980834961	0.216015577316284	female	female	adult	not_preglact	owned	never roaming	entire	healthy	0
1418	0.796131613059752	Medium	5	residential	0.0594974160194397	0.233416020870209	female	female	adult	not_preglact	owned	never roaming	entire	healthy	0
1419	2.27391920619268	Low	3	residential	0.162043690681458	0.441577434539795	male	male	adult		owned	NA	entire	healthy	1
1420	0.560349898917025	Medium	5	residential	0.0531797409057617	0.227031588554382	male	male	adult		owned	roaming	entire	healthy	1
1421	0.337809604293298	Medium	5	residential	0.0459426641464233	0.185511410236359	male	male	adult		owned	roaming	entire	healthy	1
1422	1.0636253321422	Medium	5	residential	0.0594974160194397	0.233416020870209	female	female	adult	not_preglact	owned	roaming	entire	healthy	0
1423	0.601042500860021	High	5	residential	0.0578145980834961	0.216015577316284	male	male	adult		owned	never roaming	entire	disease	0
1424	0.469771447832434	High	5	residential	0.0543613433837891	0.180977523326874	male	male	adult		owned	roaming	entire	healthy	1
1425	2.05602553214921	Low	3	NA	0.162043690681458	0.441577434539795	male	male	adult		owned	roaming	entire	healthy	0
1426	0.362541142297864	Medium	5	residential	0.0546601414680481	0.231228411197662	male	male	adult		owned	never roaming	entire	healthy	0
1427	0.538945556619333	High	5	residential	0.0578145980834961	0.216015577316284	male	male	adult		owned	never roaming	entire	unknown_health	1
1428	2.31691506458709	Low	3	residential	0.162043690681458	0.441577434539795	female	female	adult	not_preglact	owned	NA	entire	healthy	1
1429	0.794500843795091	Medium	5	residential	0.0594974160194397	0.233416020870209	male	male	adult		owned	never roaming	entire	healthy	1
1430	0.57228213091846	High	5	residential	0.038285493850708	0.228740394115448	male	male	adult		owned	roaming	neutered	healthy	0
1431	1.09824840340451	High	5	residential	0.0463465452194214	0.173745393753052	male	male	adult		owned	roaming	entire	unknown_health	1
1432	0.697854351974929	Medium	5	residential	0.0459426641464233	0.185511410236359	male	male	adult		owned	never roaming	entire	healthy	1
1433	0.274347287541078	Medium	5	residential	0.0710569620132446	0.23350864648819	male	male	adult		owned	never roaming	entire	disease	0
1434	1.87015008567487	Low	3	residential	0.129744291305542	0.400284826755524	female	female	adult	not_preglact	owned	roaming	entire	healthy	0
1435	0.362826410117041	Medium	5	residential	0.0546601414680481	0.231228411197662	female	female	adult	not_preglact	owned	never roaming	entire	healthy	0
1436	0.581314336317222	High	5	residential	0.0620661377906799	0.245069324970245	male	male	adult		owned	roaming	entire	disease	1
1437	1.23337342277759	Medium	5	residential	0.0710222125053406	0.274467587471008	female	female	adult	not_preglact	owned	roaming	entire	healthy	0
1438	0.551523238587816	Medium	5	residential	0.0459426641464233	0.185511410236359	female	female	adult	not_preglact	owned	never roaming	entire	healthy	0
1439	0.697274116931588	Medium	5	residential	0.0459426641464233	0.185511410236359	male	male	adult		owned	never roaming	entire	healthy	1
1440	1.2325158883119	Medium	5	residential	0.0710222125053406	0.274467587471008	male	male	adult		owned	roaming	entire	healthy	0
1441	1.07904857285077	High	5	residential	0.0463465452194214	0.173745393753052	male	male	adult		owned	roaming	entire	unknown_health	1
1442	0.2762425856124	Medium	5	residential	0.0710569620132446	0.23350864648819	male	male	adult		owned	never roaming	entire	disease	0
1443	0.540932672354753	High	5	residential	0.0578145980834961	0.216015577316284	female	female	adult	not_preglact	owned	never roaming	entire	unknown_health	1
1444	0.793096281850326	Medium	5	residential	0.0594974160194397	0.233416020870209	male	male	adult		owned	never roaming	entire	healthy	1
1445	1.92159402437336	Low	5	residential	0.129744291305542	0.400284826755524	male	male	adult		owned	roaming	entire	healthy	0
1446	0.793096281850326	Medium	5	residential	0.0594974160194397	0.233416020870209	male	male	adult		owned	never roaming	entire	healthy	1
1447	1.08240779324636	High	5	residential	0.0463465452194214	0.173745393753052	female	female	adult	unknown_preglact	owned	NA	entire	unknown_health	1
1448	0.564334289485174	Medium	5	residential	0.0531797409057617	0.227031588554382	female	female	adult	not_preglact	owned	roaming	entire	healthy	0
1449	0.583908631626617	High	5	residential	0.038285493850708	0.228740394115448	male	male	adult		owned	roaming	entire	healthy	0
1450	0.349578586957286	Medium	5	residential	0.0459426641464233	0.185511410236359	female	female	adult	unknown_preglact	owned	roaming	entire	healthy	1
1451	0.349578586957286	Medium	5	residential	0.0459426641464233	0.185511410236359	female	female	adult	unknown_preglact	owned	roaming	entire	healthy	1
1452	0.54778996192899	High	5	residential	0.0578145980834961	0.216015577316284	male	male	adult		owned	never roaming	entire	healthy	1
1453	0.276660956067314	Medium	5	residential	0.0710569620132446	0.23350864648819	female	female	adult	not_preglact	owned	never roaming	entire	disease	0
1454	0.276660956067314	Medium	5	residential	0.0710569620132446	0.23350864648819	female	female	adult	not_preglact	owned	never roaming	entire	disease	0
1455	0.6494240597202	Medium	5	residential	0.0407751202583313	0.178423881530762	male	male	adult		owned	never roaming	entire	healthy	1
1456	0.346729089971876	Medium	5	residential	0.0459426641464233	0.185511410236359	female	female	adult	unknown_preglact	owned	roaming	entire	disease	0
1457	0.826937715967076	Medium	5	residential	0.0670018196105957	0.28293651342392	female	female	adult	not_preglact	owned	roaming	entire	healthy	1
1458	0.595530110047141	Medium	5	residential	0.0407751202583313	0.178423881530762	male	male	adult		owned	roaming	entire	healthy	1
1459	0.361966475703316	Medium	5	residential	0.0546601414680481	0.231228411197662	male	male	adult		owned	roaming	neutered	healthy	0
1460	0.612652363041373	Medium	5	residential	0.0459426641464233	0.185511410236359	male	male	adult		owned	never roaming	entire	healthy	0
1461	0.545237035436552	High	5	residential	0.0578145980834961	0.216015577316284	male	male	adult		owned	never roaming	unknown_neuter	unknown_health	1
1462	0.615411705339949	High	5	residential	0.0578145980834961	0.216015577316284	female	female	adult	not_preglact	owned	never roaming	entire	disease	0
1463	0.711083513664212	Medium	5	residential	0.0459426641464233	0.185511410236359	male	male	adult		owned	NA	entire	healthy	0
1464	0.558645775146899	High	5	residential	0.0578145980834961	0.216015577316284	male	male	adult		owned	never roaming	entire	unknown_health	1
1465	1.87168789874477	Low	3	residential	0.129744291305542	0.400284826755524	male	male	adult		owned	roaming	entire	healthy	0
1466	0.578288164526916	High	5	residential	0.0620661377906799	0.245069324970245	female	female	adult	not_preglact	owned	roaming	entire	disease	0
1467	0.584404259101856	Medium	5	residential	0.0407751202583313	0.178423881530762	male	male	adult		owned	never roaming	entire	healthy	1
1468	1.08504484747167	High	5	residential	0.0463465452194214	0.173745393753052	male	male	adult		owned	roaming	unknown_neuter	unknown_health	1
1469	1.20979638818028	Medium	5	residential	0.0710222125053406	0.274467587471008	male	male	adult		owned	roaming	entire	healthy	1
1470	2.15900153933681	Low	3	residential	0.162043690681458	0.441577434539795	male	male	adult		owned	roaming	neutered	healthy	0
1471	0.361966475703316	Medium	5	residential	0.0546601414680481	0.231228411197662	female	female	adult	not_preglact	owned	roaming	neutered	healthy	0
1472	0.794563091578819	Medium	5	residential	0.0594974160194397	0.233416020870209	female	female	puppy	not_preglact	owned	never roaming	entire	disease	0
1473	0.732515240456955	Medium	5	residential	0.0463465452194214	0.173745393753052	male	male	adult		owned	roaming	entire	healthy	0
1474	0.356310731479294	Medium	5	residential	0.0459426641464233	0.185511410236359	female	female	adult	unknown_preglact	owned	roaming	entire	disease	0
1475	0.356310731479294	Medium	5	residential	0.0459426641464233	0.185511410236359	female	female	adult	unknown_preglact	owned	roaming	entire	disease	0
1476	2.1167755856515	Low	3	residential	0.162043690681458	0.441577434539795	female	female	adult	not_preglact	owned	roaming	entire	healthy	0
1477	0.578270992180007	High	5	residential	0.0620661377906799	0.245069324970245	female	female	adult	not_preglact	owned	roaming	entire	disease	0
1478	0.277873916114243	Medium	5	residential	0.0710569620132446	0.23350864648819	unknown	unknown	adult		owned	NA	unknown_neuter	unknown_health	1
1479	1.90047171042458	Low	3	residential	0.162043690681458	0.441577434539795	female	female_preg/lact	adult	yes_lact	owned	roaming	entire	healthy	0
1480	0.575863977913091	High	5	residential	0.0620661377906799	0.245069324970245	female	female	adult	not_preglact	owned	roaming	entire	disease	0
1481	1.09649248900809	High	5	residential	0.0463465452194214	0.173745393753052	female	female	adult	unknown_preglact	owned	roaming	unknown_neuter	unknown_health	1
1482	1.89894118360303	Low	3	residential	0.129744291305542	0.400284826755524	male	male	puppy		owned	roaming	entire	healthy	0
1483	0.351803063807078	Medium	5	residential	0.0459426641464233	0.185511410236359	female	female	adult	unknown_preglact	owned	roaming	entire	healthy	0
1484	0.615595738643173	High	5	residential	0.0578145980834961	0.216015577316284	unknown	unknown	adult		owned	roaming	unknown_neuter	unknown_health	1
1485	1.90109137304892	Low	3	residential	0.162043690681458	0.441577434539795	female	female	puppy	not_preglact	owned	roaming	entire	healthy	0
1486	0.617253956098252	High	5	residential	0.0578145980834961	0.216015577316284	unknown	unknown	adult		owned	roaming	unknown_neuter	unknown_health	1
1487	1.90074050335008	Low	3	residential	0.162043690681458	0.441577434539795	male	male	adult		owned	roaming	entire	healthy	0
1488	0.861538879162321	Medium	5	residential	0.0670018196105957	0.28293651342392	female	female	adult	not_preglact	owned	roaming	neutered	healthy	1
1489	0.857339914477102	Medium	5	residential	0.0670018196105957	0.28293651342392	female	female	adult	not_preglact	owned	roaming	neutered	healthy	1
1490	0.442472766351034	Medium	3	NA	0.0546601414680481	0.231228411197662	male	male	adult		owned	roaming	entire	healthy	1
1491	0.393430410807575	Medium	5	residential	0.0459426641464233	0.185511410236359	female	female	adult	unknown_preglact	owned	roaming	neutered	disease	1
1492	0.620529983821037	High	5	residential	0.0578145980834961	0.216015577316284	female	female	adult	not_preglact	stray	NA	unknown_neuter	disease	0
1493	1.19326048880029	Medium	3	NA	0.0710222125053406	0.274467587471008	female	female_preg/lact	adult	yes_lact	owned	roaming	entire	healthy	0
1494	1.06522058973476	High	5	residential	0.0463465452194214	0.173745393753052	female	female	puppy	unknown_preglact	owned	roaming	unknown_neuter	unknown_health	1
1495	0.391056818373397	Medium	5	residential	0.0459426641464233	0.185511410236359	male	male	adult		owned	roaming	entire	healthy	1
1496	1.89661007325016	Low	3	residential	0.129744291305542	0.400284826755524	male	male	adult		owned	roaming	entire	disease	0
1497	0.0974217367075257	Medium	5	residential	0.0546601414680481	0.231228411197662	unknown	unknown	adult		owned	NA	unknown_neuter	unknown_health	1
1498	0.801635088269069	Medium	5	residential	0.0407751202583313	0.178423881530762	female	female	adult	not_preglact	stray	NA	entire	healthy	1
1499	1.19143036031529	Medium	5	NA	0.0710222125053406	0.274467587471008	female	female	puppy	not_preglact	owned	roaming	entire	healthy	0
1500	1.94963594916635	Low	5	residential	0.129744291305542	0.400284826755524	female	female	puppy	not_preglact	owned	roaming	entire	healthy	0
1501	0.609164942143455	Medium	3	residential	0.0459426641464233	0.185511410236359	male	male	adult		owned	never roaming	neutered	healthy	0
1502	1.195597230947	Medium	5	residential	0.0710222125053406	0.274467587471008	female	female	puppy	not_preglact	owned	roaming	entire	healthy	0
1503	0.509101725456773	Medium	5	residential	0.0546601414680481	0.231228411197662	female	female	adult	not_preglact	owned	roaming	entire	healthy	1
1504	0.409547296446499	Medium	5	residential	0.0459426641464233	0.185511410236359	male	male	adult		owned	roaming	entire	disease	1
1505	1.19558854845139	Medium	5	residential	0.0710222125053406	0.274467587471008	female	female	puppy	not_preglact	owned	roaming	entire	healthy	0
1506	1.19556686597573	Medium	5	residential	0.0710222125053406	0.274467587471008	male	male	puppy		owned	roaming	entire	healthy	0
1507	0.808866087799482	Medium	5	residential	0.0407751202583313	0.178423881530762	female	female_preg/lact	adult	yes_preg	owned	roaming	entire	disease	1
1508	0.40927821456586	Medium	5	residential	0.0459426641464233	0.185511410236359	female	female	adult	unknown_preglact	owned	never roaming	entire	healthy	0
1509	1.19553866111004	Medium	5	residential	0.0710222125053406	0.274467587471008	male	male	puppy		owned	roaming	entire	healthy	0
1510	0.114057700003169	Medium	5	residential	0.0546601414680481	0.231228411197662	female	female	adult	not_preglact	owned	NA	entire	disease	0
1511	0.469013448013872	Medium	5	residential	0.0546601414680481	0.231228411197662	male	male	adult		stray	NA	entire	healthy	1
1512	0.843785783008925	Medium	5	residential	0.0594974160194397	0.233416020870209	male	male	adult		owned	roaming	entire	healthy	0
1513	0.931991067817942	Medium	5	residential	0.0670018196105957	0.28293651342392	male	male	adult		owned	roaming	entire	healthy	0
1514	0.385365950689293	High	5	residential	0.0620661377906799	0.245069324970245	male	male	adult		owned	roaming	entire	healthy	1
1515	1.18959042002363	Medium	3	NA	0.0710222125053406	0.274467587471008	male	male	puppy		owned	never roaming	entire	healthy	0
1516	0.386812123599823	High	5	residential	0.0620661377906799	0.245069324970245	male	male	adult		owned	roaming	entire	disease	1
1517	0.508030358833585	High	5	residential	0.0543613433837891	0.180977523326874	female	female	adult	not_preglact	owned	roaming	entire	disease	1
1518	0.842920251672291	Medium	5	residential	0.0594974160194397	0.233416020870209	female	female	adult	not_preglact	owned	roaming	entire	healthy	0
1519	1.18890938831923	Medium	3	NA	0.0710222125053406	0.274467587471008	female	female_preg/lact	adult	yes_preg	owned	never roaming	entire	healthy	0
1520	0.377266266730143	Medium	5	residential	0.0459426641464233	0.185511410236359	male	male	adult		owned	never roaming	entire	healthy	0
1521	0.936637322284764	Medium	5	residential	0.0670018196105957	0.28293651342392	female	female	adult	not_preglact	owned	roaming	entire	healthy	0
1522	0.841157181308172	Medium	5	residential	0.0594974160194397	0.233416020870209	male	male	adult		owned	roaming	entire	disease	0
1523	0.38173331374639	Medium	5	residential	0.0459426641464233	0.185511410236359	male	male	adult		owned	never roaming	entire	disease	0
1524	1.56448353118651	Low	5	residential	0.129744291305542	0.400284826755524	male	male	adult		owned	roaming	entire	healthy	0
1525	0.377630438415656	Medium	5	residential	0.0459426641464233	0.185511410236359	female	female	adult	not_preglact	owned	never roaming	entire	healthy	0
1526	1.56371473104031	Low	5	residential	0.129744291305542	0.400284826755524	male	male	adult		owned	roaming	entire	healthy	0
1527	0.476764600680978	High	5	residential	0.0543613433837891	0.180977523326874	male	male	adult		owned	roaming	neutered	disease	0
1528	0.377278515370414	Medium	5	residential	0.0459426641464233	0.185511410236359	female	female	adult	not_preglact	owned	never roaming	entire	healthy	0
1529	0.844762207381512	Medium	5	residential	0.0594974160194397	0.233416020870209	female	female	adult	not_preglact	owned	roaming	entire	healthy	0
1530	0.378122444233853	Medium	5	residential	0.0459426641464233	0.185511410236359	female	female	adult	not_preglact	owned	never roaming	entire	healthy	0
1531	1.04091878392593	Medium	5	residential	0.045224130153656	0.209624946117401	female	female_preg/lact	adult	yes_lact	owned	roaming	entire	healthy	1
1532	1.03361249251231	Medium	5	residential	0.0594974160194397	0.233416020870209	male	male	adult		owned	never roaming	entire	healthy	0
1533	1.04038502092582	Medium	5	residential	0.045224130153656	0.209624946117401	male	male	puppy		owned	never roaming	entire	healthy	0
1534	0.377469643084859	Medium	5	residential	0.0459426641464233	0.185511410236359	male	male	adult		owned	never roaming	entire	healthy	0
1535	0.843351925288703	Medium	5	residential	0.0594974160194397	0.233416020870209	female	female	adult	not_preglact	owned	roaming	entire	healthy	0
1536	1.0439062134683	Medium	5	residential	0.045224130153656	0.209624946117401	male	male	puppy		owned	never roaming	entire	healthy	0
1537	0.377469643084859	Medium	5	residential	0.0459426641464233	0.185511410236359	female	female	puppy	not_preglact	owned	never roaming	entire	healthy	0
1538	0.118180225817679	Medium	5	residential	0.0546601414680481	0.231228411197662	male	male	puppy		owned	never roaming	entire	healthy	0
1539	1.0368913043425	Medium	5	residential	0.0594974160194397	0.233416020870209	male	male	adult		owned	never roaming	entire	healthy	0
1540	1.04920487947944	Medium	5	residential	0.045224130153656	0.209624946117401	female	female	puppy	not_preglact	owned	never roaming	entire	healthy	0
1541	0.118180225817679	Medium	5	residential	0.0546601414680481	0.231228411197662	male	male	adult		owned	never roaming	entire	healthy	0
1542	0.377469643084859	Medium	5	residential	0.0459426641464233	0.185511410236359	male	male	adult		owned	never roaming	entire	healthy	1
1543	1.03579854110966	Medium	5	residential	0.0594974160194397	0.233416020870209	female	female	adult	not_preglact	owned	never roaming	entire	disease	0
1544	1.04807164779828	Medium	5	residential	0.045224130153656	0.209624946117401	male	male	puppy		owned	never roaming	entire	healthy	0
1545	0.116971239519184	Medium	5	residential	0.0546601414680481	0.231228411197662	male	male	puppy		owned	never roaming	entire	healthy	0
1546	2.09985505966197	Low	3	residential	0.162043690681458	0.441577434539795	male	male	adult		owned	roaming	entire	healthy	0
1547	0.377469643084859	Medium	5	residential	0.0459426641464233	0.185511410236359	male	male	adult		owned	never roaming	entire	healthy	1
1548	1.03579854110966	Medium	5	residential	0.0594974160194397	0.233416020870209	female	female	adult	not_preglact	owned	never roaming	entire	healthy	0
1549	0.112940326720941	Medium	5	residential	0.0546601414680481	0.231228411197662	male	male	puppy		owned	never roaming	entire	healthy	0
1550	1.04175394754432	Medium	5	residential	0.045224130153656	0.209624946117401	female	female	puppy	not_preglact	owned	never roaming	entire	healthy	0
1551	0.138359703517541	Medium	5	residential	0.0546601414680481	0.231228411197662	female	female	puppy	not_preglact	owned	never roaming	entire	healthy	0
1552	0.209441521356399	High	5	residential	0.0578145980834961	0.216015577316284	female	female	adult	not_preglact	owned	roaming	entire	healthy	1
1553	0.377469643084859	Medium	5	residential	0.0459426641464233	0.185511410236359	male	male	puppy		owned	never roaming	entire	healthy	0
1554	1.85420445690859	Low	5	residential	0.129744291305542	0.400284826755524	male	male	adult		owned	roaming	entire	healthy	0
1555	1.04447258434959	Medium	5	residential	0.045224130153656	0.209624946117401	female	female	puppy	not_preglact	owned	never roaming	entire	healthy	0
1556	0.167030257579386	Medium	5	residential	0.0546601414680481	0.231228411197662	female	female	puppy	not_preglact	owned	never roaming	entire	healthy	0
1557	0.129420932419347	High	5	residential	0.0505467057228088	0.20075660943985	male	male	adult		owned	never roaming	entire	healthy	0
1558	0.377469643084859	Medium	5	residential	0.0459426641464233	0.185511410236359	male	male	adult		owned	never roaming	entire	healthy	1
1559	0.207931019787183	High	5	residential	0.0578145980834961	0.216015577316284	male	male	adult		owned	NA	entire	healthy	1
1560	1.04155666667434	Medium	5	residential	0.045224130153656	0.209624946117401	female	female	adult	not_preglact	owned	never roaming	entire	healthy	0
1561	0.377469643084859	Medium	5	residential	0.0459426641464233	0.185511410236359	female	female	adult	not_preglact	owned	never roaming	entire	healthy	1
1562	0.377469643084859	Medium	5	residential	0.0459426641464233	0.185511410236359	female	female	adult	not_preglact	owned	never roaming	entire	healthy	1
1563	0.618210084957915	High	5	residential	0.0543613433837891	0.180977523326874	male	male	adult		owned	roaming	entire	disease	0
1564	0.934998703750461	Medium	5	residential	0.0670018196105957	0.28293651342392	male	male	adult		owned	roaming	entire	healthy	0
1565	0.801076588640332	Medium	5	residential	0.0594974160194397	0.233416020870209	male	male	adult		owned	roaming	entire	disease	0
1566	1.03428555195162	Medium	5	residential	0.0594974160194397	0.233416020870209	female	female	adult	not_preglact	owned	never roaming	entire	healthy	0
1567	0.197724517597906	Medium	5	residential	0.0546601414680481	0.231228411197662	unknown	unknown	adult		owned	NA	unknown_neuter	unknown_health	1
1568	0.197217900984933	Medium	5	residential	0.0546601414680481	0.231228411197662	unknown	unknown	adult		owned	NA	unknown_neuter	unknown_health	1
1569	0.573739154267491	Medium	3	residential	0.0459426641464233	0.185511410236359	male	male	adult		owned	never roaming	entire	healthy	0
1570	0.574083861879867	Medium	5	residential	0.0670018196105957	0.28293651342392	female	female	adult	not_preglact	owned	roaming	entire	healthy	0
1571	1.27534506952412	Medium	3	NA	0.0762702226638794	0.292762577533722	female	female_preg/lact	adult	yes_lact	owned	roaming	entire	healthy	0
1572	0.38418548693939	Medium	5	residential	0.0459426641464233	0.185511410236359	male	male	adult		owned	roaming	entire	healthy	1
1573	0.814011541570341	Medium	5	residential	0.0594974160194397	0.233416020870209	male	male	adult		owned	roaming	entire	disease	0
1574	0.24024866363388	Medium	5	residential	0.0546601414680481	0.231228411197662	unknown	unknown	adult		stray	NA	unknown_neuter	unknown_health	1
1575	0.891477760116088	Medium	5	residential	0.0670018196105957	0.28293651342392	male	male	adult		owned	roaming	entire	healthy	1
1576	0.359782803521426	Medium	5	residential	0.0459426641464233	0.185511410236359	male	male	adult		owned	never roaming	entire	healthy	1
1577	1.27643783801534	Medium	3	NA	0.0762702226638794	0.292762577533722	female	female	puppy	not_preglact	owned	roaming	entire	healthy	0
1578	0.862760505467412	Medium	5	residential	0.0670018196105957	0.28293651342392	male	male	adult		owned	roaming	entire	healthy	1
1579	1.27643783801534	Medium	3	NA	0.0762702226638794	0.292762577533722	female	female	puppy	not_preglact	owned	roaming	entire	healthy	0
1580	0.635111739356373	High	5	residential	0.038285493850708	0.228740394115448	female	female	adult	not_preglact	owned	never roaming	entire	disease	1
1581	0.815178850127555	Medium	5	residential	0.0594974160194397	0.233416020870209	male	male	adult		owned	roaming	entire	disease	0
1582	0.862760505467412	Medium	5	residential	0.0670018196105957	0.28293651342392	male	male	adult		owned	roaming	entire	healthy	1
1583	1.27643783801534	Medium	3	NA	0.0762702226638794	0.292762577533722	male	male	puppy		owned	roaming	entire	healthy	0
1584	0.862760505467412	Medium	5	residential	0.0670018196105957	0.28293651342392	female	female	adult	not_preglact	owned	roaming	entire	healthy	1
1585	1.27640408268997	Medium	3	NA	0.0762702226638794	0.292762577533722	male	male	puppy		owned	roaming	entire	healthy	0
1586	0.693136495820763	Medium	5	residential	0.0670018196105957	0.28293651342392	male	male	adult		owned	never roaming	entire	healthy	0
1587	0.692435504098116	Medium	5	residential	0.0670018196105957	0.28293651342392	male	male	adult		owned	roaming	entire	disease	0
1588	0.851510829915402	Medium	5	residential	0.0594974160194397	0.233416020870209	male	male	adult		owned	roaming	entire	disease	0
1589	0.868623043457555	Medium	5	residential	0.0670018196105957	0.28293651342392	male	male	adult		owned	roaming	unknown_neuter	healthy	1
1590	0.704960629716995	Medium	5	residential	0.0670018196105957	0.28293651342392	male	male	puppy		owned	roaming	entire	healthy	0
1591	1.94963594916635	Low	5	residential	0.129744291305542	0.400284826755524	male	male	adult		owned	roaming	entire	healthy	0
1592	0.798458988314812	Medium	5	residential	0.0670018196105957	0.28293651342392	male	male	adult		owned	roaming	neutered	healthy	1
1593	0.696926657286485	Medium	5	residential	0.0670018196105957	0.28293651342392	female	female	adult	not_preglact	owned	roaming	entire	healthy	0
1594	0.695321915561461	Medium	5	residential	0.0670018196105957	0.28293651342392	male	male	puppy		owned	roaming	entire	healthy	0
1595	0.535085350064831	Medium	3	residential	0.0459426641464233	0.185511410236359	male	male	adult		owned	never roaming	entire	healthy	0
1596	0.535248920268373	Medium	3	residential	0.0459426641464233	0.185511410236359	male	male	adult		owned	never roaming	entire	healthy	0
1597	1.01095908896136	Medium	5	residential	0.0594974160194397	0.233416020870209	female	female	adult	not_preglact	owned	never roaming	neutered	healthy	0
1598	0.536266745953886	Medium	3	residential	0.0459426641464233	0.185511410236359	male	male	adult		owned	never roaming	entire	healthy	0
1599	1.01177811078734	Medium	5	residential	0.0594974160194397	0.233416020870209	female	female	puppy	not_preglact	owned	never roaming	entire	healthy	0
1600	1.01177811078734	Medium	5	residential	0.0594974160194397	0.233416020870209	female	female	puppy	not_preglact	owned	never roaming	entire	healthy	0
1601	1.01177811078734	Medium	5	residential	0.0594974160194397	0.233416020870209	female	female	puppy	not_preglact	owned	never roaming	entire	healthy	0
1602	1.01177811078734	Medium	5	residential	0.0594974160194397	0.233416020870209	female	female	puppy	not_preglact	owned	never roaming	entire	healthy	0
1603	1.01140045636386	Medium	5	residential	0.0594974160194397	0.233416020870209	female	female	puppy	not_preglact	owned	never roaming	entire	healthy	0
1604	1.01140045636386	Medium	5	residential	0.0594974160194397	0.233416020870209	male	male	puppy		owned	never roaming	entire	healthy	0
1605	1.01140045636386	Medium	5	residential	0.0594974160194397	0.233416020870209	male	male	puppy		owned	never roaming	entire	healthy	0
1606	0.513398432495847	NA	5	residential	0.11014312505722	0.314207196235657	male	male	adult		owned	roaming	entire	healthy	0
1607	0.514460946980922	NA	5	residential	0.11014312505722	0.314207196235657	male	male	adult		owned	roaming	entire	healthy	0
1608	0.58805252040063	Medium	5	residential	0.0531797409057617	0.227031588554382	male	male	adult		owned	roaming	entire	healthy	1
1609	0.231908939987761	High	5	residential	0.0543524622917175	0.191298484802246	female	female	puppy	not_preglact	owned	roaming	entire	healthy	0
1610	0.372790629411203	High	5	residential	0.038285493850708	0.228740394115448	female	female	adult	not_preglact	owned	roaming	entire	disease	1
1611	0.256206322957362	High	5	residential	0.0543613433837891	0.180977523326874	male	male	adult		owned	roaming	entire	healthy	1
1612	0.587198661369828	Medium	5	residential	0.0531797409057617	0.227031588554382	male	male	adult		owned	NA	unknown_neuter	unknown_health	1
1613	0.354899387974767	High	5	residential	0.0543613433837891	0.180977523326874	female	female_preg/lact	adult	yes_lact	owned	never roaming	entire	disease	1
1614	0.281846431323408	High	5	residential	0.0543613433837891	0.180977523326874	male	male	adult		owned	roaming	entire	healthy	1
1615	0.281846431323408	High	5	residential	0.0543613433837891	0.180977523326874	male	male	adult		owned	roaming	entire	healthy	1
1616	0.233677773576858	High	5	residential	0.0543524622917175	0.191298484802246	female	female	adult	unknown_preglact	owned	roaming	entire	healthy	1
1617	0.429554705061048	Medium	5	residential	0.0531797409057617	0.227031588554382	male	male	adult		owned	never roaming	unknown_neuter	unknown_health	1
1618	0.429554705061048	Medium	5	residential	0.0531797409057617	0.227031588554382	male	male	adult		owned	never roaming	unknown_neuter	unknown_health	1
1619	0.34426876861525	High	5	residential	0.0543613433837891	0.180977523326874	female	female	puppy	not_preglact	owned	never roaming	entire	healthy	1
1620	0.600538759912131	Medium	5	residential	0.0531797409057617	0.227031588554382	male	male	adult		owned	roaming	entire	healthy	0
1621	0.343317524789531	High	5	residential	0.0543613433837891	0.180977523326874	male	male	puppy		owned	never roaming	entire	healthy	1
1622	0.20532157554607	High	5	residential	0.059701144695282	0.187464237213135	male	male	adult		owned	roaming	unknown_neuter	unknown_health	1
1623	0.343180977848828	High	5	residential	0.0543613433837891	0.180977523326874	male	male	puppy		owned	never roaming	entire	healthy	1
1624	0.375006327142226	Medium	5	residential	0.0531797409057617	0.227031588554382	male	male	adult		owned	roaming	entire	healthy	1
1625	0.343869258287566	High	5	residential	0.0543613433837891	0.180977523326874	male	male	puppy		owned	never roaming	entire	healthy	1
1626	0.273388272030929	High	5	residential	0.0543613433837891	0.180977523326874	female	female	adult	not_preglact	owned	roaming	entire	healthy	0
1627	1.10139116853778	High	5	residential	0.0463465452194214	0.173745393753052	female	female	adult	not_preglact	owned	roaming	entire	disease	0
1628	0.343299069716075	High	5	residential	0.0543613433837891	0.180977523326874	male	male	puppy		owned	never roaming	entire	healthy	1
1629	0.956482035872945	Medium	5	residential	0.0463465452194214	0.173745393753052	female	female_preg/lact	adult	yes_lact	owned	roaming	entire	disease	1
1630	0.291904985984669	High	5	residential	0.0543613433837891	0.180977523326874	female	female	adult	not_preglact	owned	roaming	neutered	healthy	1
1631	0.956052204980374	Medium	5	residential	0.0463465452194214	0.173745393753052	female	female	puppy	not_preglact	owned	NA	entire	healthy	1
1632	0.977659107362703	High	5	residential	0.0463465452194214	0.173745393753052	female	female	adult	not_preglact	owned	never roaming	entire	disease	0
1633	0.977659107362703	High	5	residential	0.0463465452194214	0.173745393753052	female	female	adult	not_preglact	owned	never roaming	entire	disease	0
1634	0.954910137096983	Medium	5	residential	0.0463465452194214	0.173745393753052	female	female	puppy	unknown_preglact	owned	NA	entire	unknown_health	1
1635	0.360747415655825	Medium	5	residential	0.0531797409057617	0.227031588554382	male	male	adult		owned	roaming	entire	healthy	1
1636	0.342589980865373	High	5	residential	0.0543613433837891	0.180977523326874	female	female_preg/lact	adult	yes_preg	owned	never roaming	entire	disease	1
1637	0.955089931234134	Medium	5	residential	0.0463465452194214	0.173745393753052	male	male	puppy		owned	roaming	entire	unknown_health	1
1638	0.483667235212464	Medium	5	residential	0.0531797409057617	0.227031588554382	unknown	unknown	adult		owned	roaming	unknown_neuter	unknown_health	0
1639	0.980948392153016	High	5	residential	0.0463465452194214	0.173745393753052	male	male	adult		owned	roaming	entire	healthy	0
1640	0.36332543407976	Medium	5	residential	0.0531797409057617	0.227031588554382	female	female	adult	not_preglact	owned	roaming	entire	healthy	1
1641	0.398646989677387	High	5	residential	0.038285493850708	0.228740394115448	female	female_preg/lact	adult	yes_preg	owned	never roaming	entire	disease	1
1642	0.980948392153016	High	5	residential	0.0463465452194214	0.173745393753052	male	male	adult		owned	roaming	entire	disease	0
1643	0.329208100591914	Medium	5	residential	0.0531797409057617	0.227031588554382	male	male	puppy		owned	roaming	entire	healthy	1
1644	0.403903019757735	High	5	residential	0.038285493850708	0.228740394115448	female	female_preg/lact	adult	yes_preg	owned	never roaming	entire	disease	1
1645	0.316353433932728	Low	5	residential	0.0737190246582031	0.275673091411591	male	male	adult		stray	NA	entire	healthy	1
1646	0.983464329649176	High	5	residential	0.0463465452194214	0.173745393753052	male	male	adult		owned	roaming	entire	disease	0
1647	0.595962223188659	Medium	5	residential	0.0531797409057617	0.227031588554382	female	female_preg/lact	adult	yes_preg	owned	roaming	entire	healthy	0
1648	0.86257797598646	High	5	residential	0.0543524622917175	0.191298484802246	male	male	adult		stray	NA	entire	healthy	0
1649	0.306014180788629	Low	5	residential	0.0737190246582031	0.275673091411591	male	male	adult		owned	never roaming	entire	healthy	1
1650	0.282203787868183	Medium	5	residential	0.0531797409057617	0.227031588554382	male	male	puppy		owned	roaming	entire	healthy	1
1651	0.964792447262517	Medium	5	residential	0.0463465452194214	0.173745393753052	male	male	adult		owned	NA	entire	healthy	1
1652	0.911402958549575	High	5	residential	0.0543524622917175	0.191298484802246	male	male	adult		owned	roaming	entire	healthy	0
1653	0.983493811460691	High	5	residential	0.0463465452194214	0.173745393753052	female	female	adult	not_preglact	owned	roaming	entire	healthy	0
1654	0.319306305292454	Low	5	residential	0.0737190246582031	0.275673091411591	female	female	adult	not_preglact	owned	never roaming	entire	healthy	1
1655	0.955684284157287	Medium	5	residential	0.0463465452194214	0.173745393753052	male	male	adult		owned	NA	entire	healthy	1
1656	0.393067757693438	High	5	residential	0.0543613433837891	0.180977523326874	female	female	adult	unknown_preglact	owned	roaming	entire	disease	1
1657	0.335263870172904	Low	5	residential	0.0737190246582031	0.275673091411591	female	female	adult	not_preglact	owned	never roaming	entire	healthy	1
1658	0.95826715552624	Medium	5	residential	0.0463465452194214	0.173745393753052	female	female	adult	not_preglact	owned	NA	entire	disease	1
1659	0.960377582222603	Medium	5	residential	0.0463465452194214	0.173745393753052	female	female	puppy	unknown_preglact	owned	NA	unknown_neuter	unknown_health	1
1660	0.127291858157277	High	5	residential	0.0618807673454285	0.207250416278839	unknown	unknown	adult		owned	roaming	unknown_neuter	unknown_health	1
1661	0.961201315446426	Medium	5	residential	0.0463465452194214	0.173745393753052	female	female	puppy	unknown_preglact	owned	NA	unknown_neuter	unknown_health	1
1662	0.301586997545528	Medium	5	residential	0.0531797409057617	0.227031588554382	male	male	adult		owned	roaming	entire	healthy	1
1663	0.135470752328829	High	5	residential	0.0618807673454285	0.207250416278839	unknown	unknown	adult		owned	roaming	unknown_neuter	unknown_health	1
1664	0.907750836039834	High	5	residential	0.0543524622917175	0.191298484802246	female	female	adult	not_preglact	owned	never roaming	entire	healthy	0
1665	1.10263534974291	High	5	residential	0.0463465452194214	0.173745393753052	unknown	unknown	adult		owned	roaming	unknown_neuter	unknown_health	1
1666	0.96080210865327	Medium	5	residential	0.0463465452194214	0.173745393753052	female	female	puppy	unknown_preglact	owned	NA	unknown_neuter	unknown_health	1
1667	0.593509113892734	Medium	5	residential	0.0531797409057617	0.227031588554382	male	male	adult		owned	roaming	entire	healthy	0
1668	0.96080210865327	Medium	5	residential	0.0463465452194214	0.173745393753052	female	female	puppy	unknown_preglact	owned	NA	unknown_neuter	unknown_health	1
1669	0.398281905091485	High	5	residential	0.0543613433837891	0.180977523326874	male	male	adult		owned	roaming	neutered	healthy	1
1670	0.306174889571522	Medium	5	residential	0.0531797409057617	0.227031588554382	female	female	puppy	not_preglact	owned	roaming	entire	healthy	0
1671	0.983640058392663	High	5	residential	0.0463465452194214	0.173745393753052	female	female	adult	not_preglact	owned	roaming	entire	healthy	0
1672	0.96080210865327	Medium	5	residential	0.0463465452194214	0.173745393753052	male	male	puppy		owned	NA	unknown_neuter	unknown_health	1
1673	0.885956576160271	High	5	residential	0.0543524622917175	0.191298484802246	female	female	puppy	not_preglact	owned	roaming	entire	healthy	0
1674	0.96080210865327	Medium	5	residential	0.0463465452194214	0.173745393753052	male	male	puppy		owned	NA	unknown_neuter	unknown_health	1
1675	0.96080210865327	Medium	5	residential	0.0463465452194214	0.173745393753052	male	male	adult		owned	NA	unknown_neuter	unknown_health	1
1676	0.306174889571522	Medium	5	residential	0.0531797409057617	0.227031588554382	male	male	adult		owned	roaming	entire	healthy	1
1677	0.306174889571522	Medium	5	residential	0.0531797409057617	0.227031588554382	male	male	adult		owned	roaming	entire	healthy	1
1678	0.378686880687671	Low	5	residential	0.0737190246582031	0.275673091411591	unknown	unknown	adult		owned	NA	unknown_neuter	healthy	1
1679	0.411812295522854	High	5	residential	0.0543613433837891	0.180977523326874	female	female	adult	not_preglact	owned	roaming	entire	healthy	1
1680	0.306103230001723	Medium	5	residential	0.0531797409057617	0.227031588554382	male	male	puppy		owned	roaming	entire	healthy	0
1681	0.306103230001723	Medium	5	residential	0.0531797409057617	0.227031588554382	male	male	puppy		owned	roaming	entire	healthy	0
1682	0.378889512991576	Low	5	residential	0.0737190246582031	0.275673091411591	unknown	unknown	adult		owned	NA	unknown_neuter	healthy	1
1683	0.13330513279545	High	5	residential	0.0618807673454285	0.207250416278839	male	male	adult		owned	roaming	unknown_neuter	unknown_health	1
1684	0.613059773698165	Medium	5	residential	0.0531797409057617	0.227031588554382	female	female	adult	not_preglact	owned	roaming	entire	healthy	0
1685	0.392378072415443	Low	5	residential	0.0737190246582031	0.275673091411591	male	male	adult		owned	roaming	entire	healthy	1
1686	0.306103230001723	Medium	5	residential	0.0531797409057617	0.227031588554382	female	female	puppy	not_preglact	owned	roaming	entire	healthy	0
1687	0.306103230001723	Medium	5	residential	0.0531797409057617	0.227031588554382	female	female	puppy	not_preglact	owned	roaming	entire	healthy	0
1688	0.39305320579959	High	5	residential	0.0543613433837891	0.180977523326874	male	male	adult		owned	roaming	entire	healthy	1
1689	1.06592122089524	High	5	residential	0.11014312505722	0.314207196235657	male	male	adult		owned	never roaming	neutered	healthy	0
1690	0.403759084105306	High	5	residential	0.0543613433837891	0.180977523326874	male	male	adult		owned	roaming	entire	healthy	1
1691	0.611610793229082	Medium	5	residential	0.0531797409057617	0.227031588554382	male	male	adult		owned	roaming	entire	healthy	0
1692	1.05032944991016	High	5	residential	0.0463465452194214	0.173745393753052	female	female	puppy	not_preglact	owned	roaming	entire	disease	0
1693	0.306103230001723	Medium	5	residential	0.0531797409057617	0.227031588554382	female	female	puppy	not_preglact	owned	roaming	entire	healthy	0
1694	0.983640058392663	High	5	residential	0.0463465452194214	0.173745393753052	female	female_preg/lact	adult	yes_lact	owned	roaming	entire	healthy	1
1695	0.910735781655989	High	5	residential	0.0543524622917175	0.191298484802246	female	female	adult	not_preglact	owned	roaming	entire	healthy	0
1696	0.306103230001723	Medium	5	residential	0.0531797409057617	0.227031588554382	female	female	puppy	not_preglact	owned	roaming	entire	healthy	0
1697	0.932178334198725	High	5	residential	0.0543524622917175	0.191298484802246	female	female	adult	not_preglact	owned	roaming	entire	healthy	0
1698	1.06564619720881	High	5	residential	0.11014312505722	0.314207196235657	female	female	adult	not_preglact	owned	never roaming	entire	healthy	0
1699	0.958192639546972	High	5	residential	0.0463465452194214	0.173745393753052	male	male	puppy		owned	never roaming	entire	healthy	1
1700	0.143577231416293	High	5	residential	0.0618807673454285	0.207250416278839	female	female	adult	unknown_preglact	owned	roaming	unknown_neuter	unknown_health	1
1701	0.428864760095258	High	5	residential	0.0543613433837891	0.180977523326874	female	female	adult	not_preglact	owned	never roaming	entire	healthy	0
1702	0.953882727183748	Medium	5	residential	0.0463465452194214	0.173745393753052	male	male	puppy		owned	never roaming	entire	healthy	1
1703	1.01851451524198	High	5	residential	0.0463465452194214	0.173745393753052	female	female	adult	not_preglact	owned	roaming	entire	disease	0
1704	0.952522665907121	Medium	5	residential	0.0463465452194214	0.173745393753052	male	male	puppy		owned	never roaming	entire	healthy	1
1705	1.063140979161	High	5	residential	0.0463465452194214	0.173745393753052	female	female	adult	not_preglact	owned	roaming	entire	disease	0
1706	0.429079717854103	High	5	residential	0.0543613433837891	0.180977523326874	female	female	adult	not_preglact	owned	never roaming	entire	healthy	1
1707	0.953839790515805	Medium	5	residential	0.0463465452194214	0.173745393753052	female	female	puppy	not_preglact	owned	never roaming	entire	healthy	1
1708	0.400391296501041	Low	5	residential	0.0737190246582031	0.275673091411591	female	female	adult	not_preglact	owned	roaming	entire	healthy	1
1709	0.95345765109921	Medium	5	residential	0.0463465452194214	0.173745393753052	female	female	puppy	not_preglact	owned	never roaming	entire	healthy	1
1710	0.432421516273169	High	5	residential	0.0543613433837891	0.180977523326874	female	female	adult	not_preglact	owned	never roaming	entire	healthy	1
1711	0.465203211187046	Low	5	residential	0.0737190246582031	0.275673091411591	female	female	adult	not_preglact	owned	roaming	entire	healthy	1
1712	1.06332673548977	High	5	residential	0.0463465452194214	0.173745393753052	female	female_preg/lact	adult	yes_lact	owned	roaming	entire	disease	0
1713	1.01749028597863	High	5	residential	0.0463465452194214	0.173745393753052	male	male	adult		owned	roaming	entire	disease	0
1714	0.931094690301495	High	5	residential	0.0543524622917175	0.191298484802246	male	male	adult		owned	roaming	entire	healthy	0
1715	1.06401829753545	High	5	residential	0.0463465452194214	0.173745393753052	male	male	puppy		owned	roaming	entire	healthy	0
1716	0.306103230001723	Medium	5	residential	0.0531797409057617	0.227031588554382	male	male	adult		owned	roaming	entire	healthy	0
1717	0.139706468330242	High	5	residential	0.0618807673454285	0.207250416278839	male	male	adult		owned	never roaming	unknown_neuter	unknown_health	1
1718	0.95480246353974	Medium	5	residential	0.0463465452194214	0.173745393753052	male	male	adult		owned	never roaming	entire	healthy	1
1719	0.97950690894268	High	5	residential	0.0463465452194214	0.173745393753052	female	female	adult	not_preglact	owned	never roaming	entire	healthy	1
1720	0.951682499846522	High	5	residential	0.0543524622917175	0.191298484802246	female	female	adult	not_preglact	owned	roaming	entire	healthy	0
1721	0.489796060430864	Low	5	residential	0.0737190246582031	0.275673091411591	female	female	adult	not_preglact	owned	roaming	entire	healthy	1
1722	1.05768195621933	High	5	residential	0.0463465452194214	0.173745393753052	female	female	puppy	not_preglact	owned	roaming	entire	healthy	0
1723	0.267065429397899	Medium	5	residential	0.0531797409057617	0.227031588554382	female	female_preg/lact	adult	yes_preg	owned	roaming	entire	healthy	0
1724	0.191633707572312	High	5	residential	0.0543524622917175	0.191298484802246	female	female	puppy	not_preglact	owned	never roaming	entire	healthy	0
1725	0.479262287510853	Low	5	residential	0.0737190246582031	0.275673091411591	male	male	adult		owned	roaming	entire	healthy	1
1726	1.05847451524592	High	5	residential	0.0463465452194214	0.173745393753052	female	female	puppy	not_preglact	owned	roaming	entire	healthy	0
1727	0.284373798110353	Medium	5	residential	0.0531797409057617	0.227031588554382	male	male	adult		owned	roaming	entire	healthy	0
1728	0.465886889271314	High	5	residential	0.0543613433837891	0.180977523326874	male	male	adult		owned	roaming	entire	healthy	0
1729	0.231192921687817	High	5	residential	0.0543524622917175	0.191298484802246	male	male	puppy		owned	never roaming	entire	healthy	0
1730	0.163118790194118	High	5	residential	0.0618807673454285	0.207250416278839	male	male	puppy		owned	never roaming	unknown_neuter	unknown_health	1
1731	1.06463583824011	High	5	residential	0.0463465452194214	0.173745393753052	male	male	adult		owned	roaming	entire	unknown_health	1
1732	1.01901613861212	High	5	residential	0.0543524622917175	0.191298484802246	male	male	puppy		owned	roaming	entire	healthy	0
1733	0.455552644593526	High	5	residential	0.0543613433837891	0.180977523326874	male	male	puppy		owned	never roaming	entire	healthy	1
1734	1.07666883511139	High	5	residential	0.11014312505722	0.314207196235657	male	male	puppy		owned	roaming	entire	disease	0
1735	0.231192921687817	High	5	residential	0.0543524622917175	0.191298484802246	male	male	puppy		owned	never roaming	entire	healthy	0
1736	1.02066669564367	High	5	residential	0.0543524622917175	0.191298484802246	male	male	puppy		owned	roaming	entire	healthy	0
1737	0.455512221310194	High	5	residential	0.0543613433837891	0.180977523326874	female	female	puppy	not_preglact	owned	never roaming	entire	healthy	1
1738	1.06563563138179	High	5	residential	0.0463465452194214	0.173745393753052	male	male	adult		owned	roaming	entire	unknown_health	1
1739	1.02066669564367	High	5	residential	0.0543524622917175	0.191298484802246	female	female	puppy	not_preglact	owned	roaming	entire	healthy	0
1740	0.231192921687817	High	5	residential	0.0543524622917175	0.191298484802246	male	male	puppy		owned	never roaming	entire	healthy	0
1741	1.06339289522484	High	5	residential	0.0463465452194214	0.173745393753052	female	female	adult	not_preglact	owned	roaming	entire	unknown_health	1
1742	0.231192921687817	High	5	residential	0.0543524622917175	0.191298484802246	female	female	puppy	not_preglact	owned	never roaming	entire	healthy	0
1743	0.982239408026474	High	5	residential	0.0463465452194214	0.173745393753052	female	female_preg/lact	adult	yes_lact	owned	roaming	entire	disease	1
1744	1.07787861548609	High	5	residential	0.11014312505722	0.314207196235657	female	female	adult	not_preglact	owned	roaming	entire	healthy	0
1745	0.231192921687817	High	5	residential	0.0543524622917175	0.191298484802246	female	female_preg/lact	adult	yes_lact	owned	never roaming	entire	healthy	1
1746	0.421999021196382	Medium	5	residential	0.0531797409057617	0.227031588554382	male	male	adult		owned	NA	unknown_neuter	unknown_health	1
1747	0.421999021196382	Medium	5	residential	0.0531797409057617	0.227031588554382	male	male	adult		owned	NA	unknown_neuter	unknown_health	1
1748	0.22827292355231	Medium	5	residential	0.0599033832550049	0.266354203224182	male	male	adult		owned	NA	unknown_neuter	unknown_health	1
1749	0.120169137835714	High	5	residential	0.0618807673454285	0.207250416278839	male	male	puppy		owned	never roaming	unknown_neuter	unknown_health	1
1750	0.975686116622141	Low	5	residential	0.0949823260307312	0.330526471138	male	male	adult		owned	roaming	entire	healthy	1
1751	0.228250208925984	Medium	5	residential	0.0599033832550049	0.266354203224182	male	male	adult		owned	NA	unknown_neuter	unknown_health	1
1752	0.228250208925984	Medium	5	residential	0.0599033832550049	0.266354203224182	male	male	adult		owned	NA	unknown_neuter	unknown_health	1
1753	0.226650771144411	Medium	5	residential	0.0599033832550049	0.266354203224182	female	female	adult	unknown_preglact	owned	NA	unknown_neuter	unknown_health	1
1754	0.232330731325969	High	5	residential	0.0543524622917175	0.191298484802246	female	female	adult	not_preglact	owned	never roaming	entire	healthy	1
1755	0.122353595793777	High	5	residential	0.0618807673454285	0.207250416278839	female	female	puppy	unknown_preglact	owned	never roaming	unknown_neuter	unknown_health	1
1756	1.01580520055587	Low	5	residential	0.0949823260307312	0.330526471138	female	female_preg/lact	adult	yes_lact	owned	roaming	entire	healthy	1
1757	0.116525128954201	High	5	residential	0.0618807673454285	0.207250416278839	female	female	adult	unknown_preglact	owned	never roaming	unknown_neuter	unknown_health	1
1758	1.0694439063607	High	5	residential	0.0463465452194214	0.173745393753052	female	female_preg/lact	adult	yes_preg	owned	NA	entire	unknown_health	1
1759	1.01580520055587	Low	5	residential	0.0949823260307312	0.330526471138	male	male	puppy		owned	roaming	entire	healthy	1
1760	1.06528817545336	High	5	residential	0.0463465452194214	0.173745393753052	female	female	adult	not_preglact	owned	roaming	entire	disease	1
1761	0.284373798110353	Medium	5	residential	0.0531797409057617	0.227031588554382	male	male	adult		owned	roaming	entire	healthy	1
1762	0.335478472855522	High	5	residential	0.0543613433837891	0.180977523326874	male	male	adult		owned	roaming	entire	healthy	0
1763	1.06898571783596	High	5	residential	0.0463465452194214	0.173745393753052	female	female	adult	not_preglact	owned	NA	entire	healthy	1
1764	1.01580520055587	Low	5	residential	0.0949823260307312	0.330526471138	male	male	puppy		owned	roaming	entire	healthy	1
1765	0.573130227930685	Low	5	residential	0.0737190246582031	0.275673091411591	male	male	adult		owned	never roaming	neutered	healthy	1
1766	1.01580520055587	Low	5	residential	0.0949823260307312	0.330526471138	female	female	puppy	not_preglact	owned	roaming	entire	healthy	1
1767	0.317684057514316	Medium	5	residential	0.0531797409057617	0.227031588554382	male	male	adult		owned	roaming	entire	healthy	1
1768	1.03663611788815	High	5	residential	0.0463465452194214	0.173745393753052	female	female	adult	not_preglact	owned	roaming	entire	disease	0
1769	0.455512221310194	High	5	residential	0.0543613433837891	0.180977523326874	male	male	adult		owned	roaming	entire	healthy	0
1770	1.01580520055587	Low	5	residential	0.0949823260307312	0.330526471138	female	female	puppy	not_preglact	owned	roaming	entire	healthy	1
1771	0.517135978077995	High	5	residential	0.0543613433837891	0.180977523326874	male	male	adult		owned	roaming	entire	healthy	0
1772	1.0712644366754	High	5	residential	0.0463465452194214	0.173745393753052	male	male	adult		owned	NA	neutered	unknown_health	0
1773	0.575044982103664	Medium	5	residential	0.0531797409057617	0.227031588554382	male	male	adult		owned	roaming	entire	healthy	1
1774	0.572615853251457	Low	5	residential	0.0737190246582031	0.275673091411591	male	male	adult		owned	never roaming	neutered	healthy	1
1775	0.100194941193451	High	5	residential	0.0618807673454285	0.207250416278839	male	male	adult		owned	never roaming	unknown_neuter	unknown_health	1
1776	1.01580520055587	Low	5	residential	0.0949823260307312	0.330526471138	female	female	puppy	not_preglact	owned	roaming	entire	healthy	1
1777	0.24604025862524	Medium	5	residential	0.0599033832550049	0.266354203224182	female	female	adult	not_preglact	owned	never roaming	entire	unknown_health	1
1778	1.04084876333326	High	5	residential	0.0463465452194214	0.173745393753052	female	female	puppy	not_preglact	owned	roaming	entire	disease	0
1779	0.305121470532416	Medium	5	residential	0.0531797409057617	0.227031588554382	male	male	adult		owned	roaming	entire	healthy	1
1780	0.303392140446259	Medium	5	residential	0.0599033832550049	0.266354203224182	unknown	unknown	adult		owned	NA	unknown_neuter	unknown_health	1
1781	0.303392140446259	Medium	5	residential	0.0599033832550049	0.266354203224182	unknown	unknown	adult		owned	NA	unknown_neuter	unknown_health	1
1782	0.304762135379739	Medium	5	residential	0.0531797409057617	0.227031588554382	male	male	adult		owned	never roaming	entire	healthy	1
1783	0.310777836626958	Medium	5	residential	0.0599033832550049	0.266354203224182	unknown	unknown	adult		owned	never roaming	unknown_neuter	unknown_health	1
1784	0.241181735452477	High	5	residential	0.0543524622917175	0.191298484802246	male	male	adult		owned	never roaming	entire	healthy	1
1785	0.307025634029821	Medium	5	residential	0.0531797409057617	0.227031588554382	female	female	adult	not_preglact	owned	roaming	entire	healthy	1
1786	0.49625224036536	High	5	residential	0.0543613433837891	0.180977523326874	male	male	adult		owned	roaming	entire	healthy	1
1787	0.121888045723993	High	5	residential	0.0618807673454285	0.207250416278839	male	male	adult		owned	never roaming	unknown_neuter	unknown_health	1
1788	1.0723165758321	High	5	residential	0.0463465452194214	0.173745393753052	male	male	adult		owned	NA	entire	healthy	0
1789	0.120411758058125	High	5	residential	0.0618807673454285	0.207250416278839	female	female	adult	unknown_preglact	owned	never roaming	unknown_neuter	unknown_health	1
1790	1.06269941221732	High	5	residential	0.11014312505722	0.314207196235657	female	female	adult	not_preglact	owned	roaming	neutered	healthy	0
1791	1.65823956592433	Low	5	residential	0.0995644330978394	0.34982043504715	male	male	adult		owned	roaming	entire	healthy	0
1792	1.02066669564367	High	5	residential	0.0543524622917175	0.191298484802246	male	male	puppy		owned	roaming	entire	healthy	0
1793	0.12125303515213	High	5	residential	0.0618807673454285	0.207250416278839	female	female	adult	unknown_preglact	owned	never roaming	unknown_neuter	unknown_health	1
1794	0.56698765794199	Medium	5	residential	0.0531797409057617	0.227031588554382	male	male	adult		owned	roaming	entire	healthy	0
1795	0.354036460382744	Medium	5	residential	0.0531797409057617	0.227031588554382	female	female	adult	not_preglact	owned	roaming	entire	healthy	0
1796	0.787170350047548	High	5	residential	0.0543524622917175	0.191298484802246	male	male	puppy		owned	roaming	entire	healthy	0
1797	0.118173905813889	High	5	residential	0.0618807673454285	0.207250416278839	female	female	adult	unknown_preglact	owned	never roaming	unknown_neuter	unknown_health	1
1798	0.235181374875324	High	5	residential	0.0543524622917175	0.191298484802246	female	female	adult	not_preglact	owned	roaming	entire	healthy	1
1799	1.04450336668431	High	5	residential	0.0463465452194214	0.173745393753052	male	male	puppy		owned	roaming	entire	disease	0
1800	0.12027457362621	High	5	residential	0.0618807673454285	0.207250416278839	female	female	adult	unknown_preglact	owned	never roaming	unknown_neuter	unknown_health	1
1801	1.65932240130683	Low	5	residential	0.0995644330978394	0.34982043504715	female	female	adult	not_preglact	owned	roaming	neutered	healthy	0
1802	0.339500871760387	Medium	5	residential	0.0531797409057617	0.227031588554382	female	female	adult	unknown_preglact	owned	NA	unknown_neuter	unknown_health	1
1803	0.120688798660158	High	5	residential	0.0618807673454285	0.207250416278839	female	female	adult	unknown_preglact	owned	never roaming	unknown_neuter	unknown_health	1
1804	0.467214851975081	Low	5	residential	0.0737190246582031	0.275673091411591	male	male	adult		owned	never roaming	entire	disease	0
1805	1.06243482772771	High	5	residential	0.11014312505722	0.314207196235657	female	female	adult	not_preglact	owned	roaming	neutered	healthy	0
1806	1.08328754469019	High	5	residential	0.0463465452194214	0.173745393753052	female	female	adult	unknown_preglact	owned	NA	entire	healthy	1
1807	0.745114690544558	High	5	residential	0.0543524622917175	0.191298484802246	male	male	adult		owned	roaming	entire	healthy	0
1808	0.53534792821473	Medium	5	residential	0.0531797409057617	0.227031588554382	male	male	adult		owned	roaming	entire	healthy	0
1809	1.65999930276746	Low	5	residential	0.0995644330978394	0.34982043504715	male	male	adult		owned	roaming	entire	healthy	0
1810	0.118878139300487	High	5	residential	0.0618807673454285	0.207250416278839	male	male	adult		owned	NA	unknown_neuter	disease	0
1811	0.353447610343483	Medium	5	residential	0.0531797409057617	0.227031588554382	male	male	adult		owned	NA	unknown_neuter	unknown_health	1
1812	0.353447610343483	Medium	5	residential	0.0531797409057617	0.227031588554382	male	male	adult		owned	NA	unknown_neuter	unknown_health	1
1813	0.351127482710636	Medium	5	residential	0.0531797409057617	0.227031588554382	male	male	adult		owned	NA	unknown_neuter	unknown_health	1
1814	0.433245573348575	High	5	residential	0.0543613433837891	0.180977523326874	male	male	adult		owned	roaming	entire	disease	0
1815	0.333920636136893	Medium	5	residential	0.0531797409057617	0.227031588554382	male	male	puppy		owned	roaming	entire	healthy	0
1816	0.535623051590241	Medium	5	residential	0.0531797409057617	0.227031588554382	male	male	adult		owned	roaming	entire	healthy	0
1817	1.01580520055587	Low	5	residential	0.0949823260307312	0.330526471138	female	female_preg/lact	adult	yes_preg	owned	roaming	entire	healthy	1
1818	0.348293676517694	Medium	5	residential	0.0531797409057617	0.227031588554382	male	male	adult		owned	NA	unknown_neuter	healthy	1
1819	1.09610337569772	High	5	residential	0.0463465452194214	0.173745393753052	female	female	adult	not_preglact	owned	NA	unknown_neuter	unknown_health	1
1820	0.362639980002791	Medium	5	residential	0.0531797409057617	0.227031588554382	male	male	adult		owned	never roaming	entire	healthy	0
1821	0.362639980002791	Medium	5	residential	0.0531797409057617	0.227031588554382	male	male	adult		owned	never roaming	entire	healthy	0
1822	0.436532256461569	High	5	residential	0.0543613433837891	0.180977523326874	female	female_preg/lact	adult	yes_lact	owned	roaming	entire	disease	0
1823	1.04448955645488	High	5	residential	0.0463465452194214	0.173745393753052	female	female	puppy	not_preglact	owned	roaming	entire	disease	0
1824	0.590691464184447	High	5	residential	0.11014312505722	0.314207196235657	female	female	adult	not_preglact	owned	roaming	entire	disease	1
1825	0.105450013210156	High	5	residential	0.0618807673454285	0.207250416278839	male	male	adult		owned	never roaming	unknown_neuter	unknown_health	1
1826	0.33929988892278	High	5	residential	0.0543613433837891	0.180977523326874	female	female	adult	not_preglact	owned	roaming	neutered	healthy	1
1827	1.04241964853103	High	5	residential	0.0463465452194214	0.173745393753052	male	male	puppy		owned	roaming	entire	disease	0
1828	1.05213541561129	Low	5	residential	0.0949823260307312	0.330526471138	female	female	adult	not_preglact	owned	roaming	entire	healthy	1
1829	0.334489409186969	Medium	5	residential	0.0531797409057617	0.227031588554382	male	male	adult		owned	roaming	entire	healthy	0
1830	0.255520672299363	High	5	residential	0.0543524622917175	0.191298484802246	female	female	adult	not_preglact	owned	roaming	entire	disease	0
1831	1.02693871796341	High	5	residential	0.0463465452194214	0.173745393753052	female	female	adult	not_preglact	owned	roaming	entire	healthy	0
1832	1.05213541561129	Low	5	residential	0.0949823260307312	0.330526471138	female	female	adult	not_preglact	owned	roaming	entire	healthy	1
1833	0.955348523310573	Medium	5	residential	0.11014312505722	0.314207196235657	female	female	adult	not_preglact	owned	roaming	entire	healthy	1
1834	0.434865792407802	High	5	residential	0.0543613433837891	0.180977523326874	female	female	puppy	not_preglact	owned	roaming	entire	healthy	0
1835	0.362952547191297	High	5	residential	0.0543613433837891	0.180977523326874	male	male	adult		owned	roaming	neutered	healthy	1
1836	0.764067638499774	High	5	residential	0.0543524622917175	0.191298484802246	male	male	adult		owned	roaming	entire	healthy	1
1837	0.59548259393105	High	5	residential	0.11014312505722	0.314207196235657	male	male	adult		owned	never roaming	entire	disease	0
1838	1.04218351424586	High	5	residential	0.0463465452194214	0.173745393753052	male	male	puppy		owned	roaming	entire	disease	0
1839	1.6719001070581	Low	5	residential	0.131640493869781	0.40896338224411	female	female	adult	not_preglact	owned	roaming	entire	healthy	0
1840	0.43684960795979	High	5	residential	0.0543613433837891	0.180977523326874	female	female	puppy	not_preglact	owned	roaming	entire	healthy	0
1841	0.334530583815553	Medium	5	residential	0.0531797409057617	0.227031588554382	female	female_preg/lact	adult	yes_preg	owned	roaming	entire	healthy	0
1842	0.852981047893504	High	5	residential	0.0543524622917175	0.191298484802246	male	male	adult		owned	roaming	entire	healthy	1
1843	0.439157510771718	High	5	residential	0.0543613433837891	0.180977523326874	male	male	puppy		owned	never roaming	entire	healthy	0
1844	0.387981865624614	Medium	5	residential	0.0531797409057617	0.227031588554382	male	male	adult		owned	never roaming	entire	healthy	0
1845	0.387981865624614	Medium	5	residential	0.0531797409057617	0.227031588554382	male	male	adult		owned	never roaming	entire	healthy	0
1846	1.67344864394817	Low	5	residential	0.131640493869781	0.40896338224411	female	female	adult	not_preglact	owned	roaming	entire	healthy	0
1847	0.432281902975215	High	5	residential	0.0543613433837891	0.180977523326874	male	male	puppy		owned	never roaming	entire	healthy	0
1848	1.02620752480079	High	5	residential	0.0463465452194214	0.173745393753052	male	male	adult		owned	roaming	entire	unknown_health	1
1849	0.429446865473618	High	5	residential	0.0543613433837891	0.180977523326874	male	male	puppy		owned	never roaming	entire	healthy	0
1850	0.988367084701916	High	5	residential	0.0463465452194214	0.173745393753052	unknown	unknown	adult		owned	roaming	unknown_neuter	disease	1
1851	1.05213541561129	Low	5	residential	0.0949823260307312	0.330526471138	male	male	adult		owned	roaming	entire	healthy	0
1852	0.43356806428978	High	5	residential	0.0543613433837891	0.180977523326874	male	male	puppy		owned	never roaming	entire	healthy	0
1853	0.436067541398809	High	5	residential	0.0543613433837891	0.180977523326874	female	female	adult	not_preglact	owned	never roaming	entire	disease	0
1854	1.17742350258288	High	5	residential	0.0463465452194214	0.173745393753052	female	female_preg/lact	adult	yes_lact	owned	NA	entire	healthy	1
1855	1.04193896940422	High	5	residential	0.0463465452194214	0.173745393753052	male	male	puppy		owned	roaming	entire	disease	0
1856	1.74341347534869	Low	5	residential	0.131640493869781	0.40896338224411	male	male	adult		owned	roaming	neutered	healthy	1
1857	0.785968902284325	High	5	residential	0.0543524622917175	0.191298484802246	female	female	adult	not_preglact	owned	roaming	entire	healthy	0
1858	0.43565864031387	High	5	residential	0.0543613433837891	0.180977523326874	female	female	adult	not_preglact	owned	never roaming	entire	disease	1
1859	1.18005439515255	High	5	residential	0.0463465452194214	0.173745393753052	unknown	unknown	adult		owned	NA	unknown_neuter	unknown_health	0
1860	1.09578137649801	Low	5	residential	0.0949823260307312	0.330526471138	female	female	adult	not_preglact	owned	roaming	entire	healthy	0
1861	0.915220389652296	High	5	residential	0.0543524622917175	0.191298484802246	female	female	adult	not_preglact	owned	roaming	entire	healthy	0
1862	0.36484594324461	High	5	residential	0.0543613433837891	0.180977523326874	male	male	adult		owned	never roaming	entire	healthy	1
1863	1.02244198950218	High	5	residential	0.0463465452194214	0.173745393753052	female	female	puppy	not_preglact	owned	roaming	entire	disease	0
1864	0.908167746403243	High	5	residential	0.11014312505722	0.314207196235657	male	male	adult		owned	roaming	entire	healthy	1
1865	0.110136889439885	High	5	residential	0.0618807673454285	0.207250416278839	female	female	adult	unknown_preglact	owned	never roaming	unknown_neuter	unknown_health	1
1866	0.126998697512987	High	5	residential	0.059701144695282	0.187464237213135	female	female	adult	unknown_preglact	owned	never roaming	unknown_neuter	unknown_health	1
1867	0.984186800584815	High	5	residential	0.0463465452194214	0.173745393753052	male	male	adult		owned	roaming	entire	healthy	0
1868	0.125783375318072	High	5	residential	0.059701144695282	0.187464237213135	female	female	adult	unknown_preglact	owned	never roaming	unknown_neuter	unknown_health	1
1869	0.377748056141346	High	5	residential	0.0543613433837891	0.180977523326874	male	male	adult		owned	never roaming	entire	healthy	1
1870	1.10693245153708	Low	5	residential	0.0949823260307312	0.330526471138	male	male	adult		owned	roaming	entire	disease	0
1871	0.372369839206567	High	5	residential	0.0543613433837891	0.180977523326874	female	female	adult	unknown_preglact	owned	never roaming	entire	healthy	1
1872	1.10693245153708	Low	5	residential	0.0949823260307312	0.330526471138	male	male	adult		owned	roaming	entire	healthy	0
1873	0.597441177773191	High	5	residential	0.11014312505722	0.314207196235657	male	male	adult		owned	never roaming	entire	healthy	1
1874	1.70727091204801	Low	5	residential	0.131640493869781	0.40896338224411	male	male	adult		owned	roaming	neutered	healthy	0
1875	0.28516654662255	High	5	residential	0.0543524622917175	0.191298484802246	male	male	adult		owned	never roaming	entire	healthy	1
1876	0.983939525660569	High	5	residential	0.0463465452194214	0.173745393753052	male	male	adult		owned	roaming	entire	disease	0
1877	0.389779007223858	Medium	5	residential	0.0531797409057617	0.227031588554382	male	male	adult		owned	never roaming	entire	disease	0
1878	0.389779007223858	Medium	5	residential	0.0531797409057617	0.227031588554382	male	male	adult		owned	never roaming	entire	disease	0
1879	0.34276696909577	High	5	residential	0.0543613433837891	0.180977523326874	male	male	adult		owned	roaming	entire	disease	1
1880	1.71270561948078	Low	5	residential	0.131640493869781	0.40896338224411	female	female	adult	not_preglact	owned	roaming	entire	healthy	0
1881	1.17921660816593	High	5	residential	0.0463465452194214	0.173745393753052	male	male	adult		owned	NA	entire	unknown_health	0
1882	0.328964490683372	High	5	residential	0.0543613433837891	0.180977523326874	male	male	adult		owned	roaming	entire	healthy	0
1883	0.372369839206567	High	5	residential	0.0543613433837891	0.180977523326874	male	male	adult		owned	never roaming	entire	healthy	1
1884	0.312236849539909	Low	5	residential	0.0737190246582031	0.275673091411591	male	male	adult		owned	never roaming	neutered	healthy	1
1885	0.597701784336582	High	5	residential	0.11014312505722	0.314207196235657	male	male	adult		owned	never roaming	entire	healthy	0
1886	1.17612180234385	High	5	residential	0.0463465452194214	0.173745393753052	male	male	adult		owned	NA	unknown_neuter	unknown_health	0
1887	0.297481469425179	Low	5	residential	0.0737190246582031	0.275673091411591	female	female	adult	not_preglact	owned	never roaming	entire	healthy	1
1888	1.17586697048732	High	5	residential	0.0463465452194214	0.173745393753052	female	female	adult	unknown_preglact	owned	NA	unknown_neuter	unknown_health	0
1889	0.577202111986588	Medium	5	residential	0.0531797409057617	0.227031588554382	male	male	adult		owned	roaming	entire	healthy	0
1890	0.985723204317403	High	5	residential	0.0463465452194214	0.173745393753052	female	female	adult	not_preglact	owned	roaming	entire	disease	0
1891	0.442968309434277	High	5	residential	0.0543613433837891	0.180977523326874	male	male	adult		owned	never roaming	entire	healthy	1
1892	0.339776393285342	High	5	residential	0.0543613433837891	0.180977523326874	female	female	adult	not_preglact	owned	roaming	entire	disease	0
1893	0.300225633724727	Low	5	residential	0.0737190246582031	0.275673091411591	female	female	adult	not_preglact	owned	never roaming	entire	healthy	1
1894	0.550313356450085	Medium	5	residential	0.0531797409057617	0.227031588554382	male	male	adult		owned	roaming	entire	healthy	1
1895	0.956072055069679	High	5	residential	0.0463465452194214	0.173745393753052	male	male	adult		owned	roaming	neutered	disease	0
1896	0.914167489777308	High	5	residential	0.11014312505722	0.314207196235657	female	female	adult	not_preglact	owned	roaming	entire	healthy	1
1897	0.410465449456911	Low	5	residential	0.0543524622917175	0.191298484802246	male	male	adult		owned	never roaming	entire	healthy	1
1898	0.299410271270093	Low	5	residential	0.0737190246582031	0.275673091411591	male	male	adult		owned	never roaming	entire	healthy	1
1899	0.155154794597541	High	5	residential	0.059701144695282	0.187464237213135	female	female	adult	unknown_preglact	owned	never roaming	unknown_neuter	unknown_health	1
1900	0.405540810131538	Medium	5	residential	0.0531797409057617	0.227031588554382	unknown	unknown	adult		owned	roaming	unknown_neuter	healthy	0
1901	0.155154794597541	High	5	residential	0.059701144695282	0.187464237213135	female	female	adult	unknown_preglact	owned	NA	unknown_neuter	unknown_health	1
1902	0.336721280525725	Medium	5	residential	0.0531797409057617	0.227031588554382	female	female	adult	not_preglact	owned	roaming	entire	healthy	1
1903	0.154110369675056	High	5	residential	0.059701144695282	0.187464237213135	male	male	puppy		owned	never roaming	unknown_neuter	unknown_health	1
1904	1.03315124640539	High	5	residential	0.0463465452194214	0.173745393753052	female	female	adult	not_preglact	owned	roaming	entire	disease	0
1905	0.409458509699954	Low	5	residential	0.0543524622917175	0.191298484802246	male	male	adult		owned	never roaming	neutered	healthy	1
1906	1.10693245153708	Low	5	residential	0.0949823260307312	0.330526471138	male	male	adult		owned	roaming	entire	healthy	0
1907	1.64013301805548	Low	5	residential	0.0995644330978394	0.34982043504715	male	male	adult		owned	roaming	entire	healthy	0
1908	0.375490853552875	Medium	5	residential	0.0600326061248779	0.217603743076324	female	female	adult	not_preglact	owned	roaming	entire	healthy	1
1909	0.887740588160264	High	5	residential	0.11014312505722	0.314207196235657	male	male	adult		owned	roaming	entire	healthy	0
1910	1.25329914392623	High	5	residential	0.0523815155029297	0.195089876651764	female	female	adult	not_preglact	owned	NA	entire	disease	1
1911	0.981695821356069	High	5	residential	0.0463465452194214	0.173745393753052	female	female	adult	not_preglact	owned	roaming	entire	healthy	0
1912	1.64052869460715	Low	5	residential	0.0995644330978394	0.34982043504715	male	male	adult		owned	roaming	entire	healthy	0
1913	0.232542453576398	Low	5	residential	0.0737190246582031	0.275673091411591	male	male	adult		owned	never roaming	unknown_neuter	healthy	1
1914	0.423280510237303	High	5	residential	0.0543613433837891	0.180977523326874	male	male	adult		owned	roaming	entire	healthy	1
1915	1.63765645171213	Low	5	residential	0.0995644330978394	0.34982043504715	female	female_preg/lact	adult	yes_lact	owned	roaming	entire	healthy	0
1916	0.212130257936038	Low	5	residential	0.0737190246582031	0.275673091411591	female	female	adult	not_preglact	owned	NA	entire	healthy	1
1917	0.936060663677405	High	5	residential	0.0463465452194214	0.173745393753052	male	male	adult		owned	roaming	unknown_neuter	disease	1
1918	0.218041632614112	Low	5	residential	0.0737190246582031	0.275673091411591	female	female	adult	not_preglact	owned	NA	entire	healthy	1
1919	1.64214389232115	Low	5	residential	0.0995644330978394	0.34982043504715	female	female	puppy	not_preglact	owned	roaming	entire	healthy	0
1920	0.418083731770655	High	5	residential	0.0543613433837891	0.180977523326874	male	male	adult		owned	never roaming	neutered	disease	1
1921	1.63775800508824	Low	5	residential	0.0995644330978394	0.34982043504715	female	female	puppy	not_preglact	owned	roaming	entire	healthy	0
1922	0.516645452107415	Medium	5	residential	0.0531797409057617	0.227031588554382	male	male	adult		owned	roaming	neutered	healthy	0
1923	0.935767991149389	High	5	residential	0.0463465452194214	0.173745393753052	female	female	adult	not_preglact	owned	roaming	unknown_neuter	healthy	1
1924	1.1605052551892	Low	5	residential	0.0949823260307312	0.330526471138	female	female	adult	not_preglact	owned	roaming	entire	healthy	0
1925	1.25361622741969	High	5	residential	0.0523815155029297	0.195089876651764	female	female	adult	not_preglact	owned	NA	unknown_neuter	healthy	1
1926	1.63749242921242	Low	5	residential	0.0995644330978394	0.34982043504715	female	female	puppy	not_preglact	owned	roaming	entire	healthy	0
1927	0.91735783943416	High	5	residential	0.11014312505722	0.314207196235657	male	male	adult		owned	roaming	entire	disease	1
1928	0.369649112809776	High	5	residential	0.0543524622917175	0.191298484802246	male	male	adult		owned	never roaming	entire	healthy	1
1929	1.63749242921242	Low	5	residential	0.0995644330978394	0.34982043504715	male	male	puppy		owned	roaming	entire	healthy	0
1930	0.516645452107415	Medium	5	residential	0.0531797409057617	0.227031588554382	female	female_preg/lact	adult	yes_preg	owned	roaming	entire	healthy	0
1931	0.303462768386693	High	5	residential	0.0543613433837891	0.180977523326874	male	male	adult		owned	never roaming	entire	disease	1
1932	1.63749242921242	Low	5	residential	0.0995644330978394	0.34982043504715	male	male	puppy		owned	roaming	entire	healthy	0
1933	0.395640581852333	High	5	residential	0.0543524622917175	0.191298484802246	male	male	adult		owned	never roaming	neutered	healthy	1
1934	0.981191766434595	High	5	residential	0.0463465452194214	0.173745393753052	male	male	adult		owned	never roaming	entire	healthy	1
1935	1.17232960550014	Low	5	residential	0.0949823260307312	0.330526471138	female	female	adult	not_preglact	owned	roaming	entire	healthy	0
1936	0.243304305493329	High	5	residential	0.059701144695282	0.187464237213135	unknown	unknown	puppy		owned	never roaming	unknown_neuter	unknown_health	1
1937	0.516645452107415	Medium	5	residential	0.0531797409057617	0.227031588554382	female	female	adult	not_preglact	owned	roaming	entire	healthy	0
1938	0.407895284564187	High	5	residential	0.11014312505722	0.314207196235657	male	male	adult		owned	roaming	entire	disease	1
1939	1.63749242921242	Low	5	residential	0.0995644330978394	0.34982043504715	male	male	puppy		owned	roaming	entire	healthy	0
1940	0.901656433976535	High	5	residential	0.0463465452194214	0.173745393753052	male	male	adult		owned	roaming	neutered	healthy	1
1941	0.94672614664722	High	5	residential	0.0463465452194214	0.173745393753052	male	male	adult		owned	never roaming	entire	healthy	1
1942	0.250054806297014	High	5	residential	0.059701144695282	0.187464237213135	female	female	puppy	unknown_preglact	owned	never roaming	unknown_neuter	unknown_health	1
1943	1.63749242921242	Low	5	residential	0.0995644330978394	0.34982043504715	male	male	puppy		owned	roaming	entire	healthy	0
1944	0.305402345672343	High	5	residential	0.0543613433837891	0.180977523326874	male	male	adult		owned	never roaming	neutered	disease	1
1945	0.94672614664722	High	5	residential	0.0463465452194214	0.173745393753052	male	male	puppy		owned	never roaming	entire	healthy	1
1946	0.413288612234476	High	5	residential	0.0543524622917175	0.191298484802246	female	female_preg/lact	adult	yes_preg	owned	roaming	entire	healthy	1
1947	0.460455708554742	High	5	residential	0.0543613433837891	0.180977523326874	female	female	adult	not_preglact	owned	roaming	entire	healthy	1
1948	0.248148942707806	High	5	residential	0.059701144695282	0.187464237213135	female	female	puppy	unknown_preglact	owned	never roaming	unknown_neuter	unknown_health	1
1949	0.410206389890258	High	5	residential	0.11014312505722	0.314207196235657	male	male	adult		owned	roaming	entire	healthy	1
1950	0.414087369560419	High	5	residential	0.0543524622917175	0.191298484802246	female	female	adult	not_preglact	owned	roaming	entire	healthy	1
1951	0.237451763202909	High	5	residential	0.059701144695282	0.187464237213135	male	male	puppy		owned	never roaming	entire	healthy	1
1952	1.32714952855934	High	5	residential	0.0523815155029297	0.195089876651764	male	male	adult		owned	NA	entire	healthy	1
1953	1.64240638448944	Low	5	residential	0.0995644330978394	0.34982043504715	female	female	adult	not_preglact	owned	roaming	entire	healthy	0
1954	0.839291690451053	Medium	5	residential	0.0620661377906799	0.245069324970245	female	female	adult	not_preglact	stray	NA	entire	healthy	0
1955	0.435347321139158	Medium	5	residential	0.0531797409057617	0.227031588554382	female	female	adult	not_preglact	owned	never roaming	entire	disease	1
1956	0.465951364599892	High	5	residential	0.0543613433837891	0.180977523326874	female	female	adult	not_preglact	owned	roaming	entire	healthy	1
1957	0.338179458894634	High	5	residential	0.0543613433837891	0.180977523326874	female	female	adult	not_preglact	owned	roaming	entire	disease	1
1958	0.902379467611056	High	5	residential	0.0463465452194214	0.173745393753052	male	male	adult		owned	never roaming	neutered	healthy	0
1959	0.470021082389702	High	5	residential	0.0543613433837891	0.180977523326874	male	male	adult		owned	roaming	entire	healthy	1
1960	1.28668534963913	High	5	residential	0.0523815155029297	0.195089876651764	male	male	adult		owned	NA	entire	unknown_health	1
1961	0.369425889218613	Medium	5	residential	0.0600326061248779	0.217603743076324	female	female_preg/lact	adult	yes_lact	owned	roaming	entire	healthy	1
1962	0.409514766132457	High	5	residential	0.0543613433837891	0.180977523326874	male	male	adult		owned	never roaming	neutered	disease	1
1963	1.6429515701335	Low	5	residential	0.0995644330978394	0.34982043504715	female	female	adult	not_preglact	owned	roaming	entire	healthy	0
1964	0.47588531402639	Medium	5	residential	0.0531797409057617	0.227031588554382	male	male	adult		owned	NA	unknown_neuter	unknown_health	1
1965	0.264379218959067	High	5	residential	0.059701144695282	0.187464237213135	female	female	puppy	not_preglact	owned	never roaming	entire	healthy	1
1966	0.94825119594874	High	5	residential	0.0463465452194214	0.173745393753052	male	male	adult		owned	roaming	entire	healthy	1
1967	0.255345908933779	High	5	residential	0.059701144695282	0.187464237213135	female	female	puppy	not_preglact	owned	never roaming	entire	healthy	1
1968	0.408048005402699	High	5	residential	0.0543613433837891	0.180977523326874	male	male	adult		owned	never roaming	neutered	disease	1
1969	0.4060269159994	High	5	residential	0.0543613433837891	0.180977523326874	female	female	adult	unknown_preglact	owned	never roaming	entire	disease	1
1970	0.254940666094955	High	5	residential	0.059701144695282	0.187464237213135	male	male	puppy		owned	never roaming	entire	healthy	1
1971	0.468722532743876	Medium	5	residential	0.0599033832550049	0.266354203224182	male	male	adult		owned	never roaming	entire	healthy	1
1972	0.468722532743876	Medium	5	residential	0.0599033832550049	0.266354203224182	male	male	adult		owned	never roaming	entire	healthy	1
1973	0.46597150894215	High	5	residential	0.0543613433837891	0.180977523326874	female	female	adult	not_preglact	owned	roaming	entire	healthy	1
1974	0.257737459372591	High	5	residential	0.059701144695282	0.187464237213135	male	male	puppy		owned	never roaming	entire	healthy	1
1975	0.448261750077652	Medium	5	residential	0.0599033832550049	0.266354203224182	female	female_preg/lact	adult	yes_lact	owned	NA	entire	healthy	1
1976	0.465892824715658	High	5	residential	0.0543613433837891	0.180977523326874	male	male	adult		owned	roaming	entire	healthy	1
1977	0.253631367896601	High	5	residential	0.059701144695282	0.187464237213135	male	male	puppy		owned	never roaming	entire	healthy	1
1978	0.33526181829065	High	5	residential	0.0543613433837891	0.180977523326874	female	female	adult	not_preglact	owned	roaming	entire	disease	1
1979	0.388215057616362	Medium	5	residential	0.0600326061248779	0.217603743076324	female	female_preg/lact	adult	yes_lact	owned	roaming	entire	healthy	1
1980	0.252942191775468	High	5	residential	0.059701144695282	0.187464237213135	female	female_preg/lact	adult	yes_lact	owned	never roaming	entire	disease	1
1981	1.1032089181186	High	5	residential	0.0470207333564758	0.216870427131653	male	male	adult		owned	roaming	entire	healthy	0
1982	0.378611919845924	High	5	residential	0.11014312505722	0.314207196235657	male	male	adult		owned	NA	entire	healthy	1
1983	1.29340442063221	High	5	residential	0.0523815155029297	0.195089876651764	female	female	adult	not_preglact	owned	NA	entire	healthy	1
1984	1.62123580423711	Low	5	residential	0.131640493869781	0.40896338224411	male	male	adult		owned	roaming	entire	healthy	0
1985	0.393430517157901	Medium	5	residential	0.0600326061248779	0.217603743076324	female	female	adult	not_preglact	owned	roaming	entire	healthy	0
1986	1.18339547282613	Low	5	residential	0.0949823260307312	0.330526471138	male	male	adult		owned	roaming	entire	healthy	0
1987	1.09340487500584	High	5	residential	0.0463465452194214	0.173745393753052	female	female	puppy	not_preglact	owned	roaming	entire	healthy	1
1988	0.255615979112742	High	5	residential	0.059701144695282	0.187464237213135	female	female	adult	not_preglact	owned	never roaming	entire	healthy	1
1989	0.378238730130066	High	5	residential	0.11014312505722	0.314207196235657	female	female	adult	not_preglact	owned	never roaming	entire	healthy	0
1990	1.29208858264672	High	5	residential	0.0523815155029297	0.195089876651764	male	male	adult		owned	NA	entire	unknown_health	1
1991	0.380295878742978	High	5	residential	0.11014312505722	0.314207196235657	female	female	adult	not_preglact	owned	never roaming	entire	healthy	1
1992	0.394541723455428	Medium	5	residential	0.0600326061248779	0.217603743076324	female	female_preg/lact	adult	yes_preg	owned	roaming	entire	healthy	0
1993	1.20898256557514	Low	5	residential	0.0949823260307312	0.330526471138	male	male	adult		owned	roaming	entire	healthy	0
1994	0.378432223128775	High	5	residential	0.11014312505722	0.314207196235657	male	male	adult		owned	never roaming	entire	healthy	1
1995	1.09030158022275	High	5	residential	0.0463465452194214	0.173745393753052	male	male	puppy		owned	roaming	entire	healthy	1
1996	1.20898256557514	Low	5	residential	0.0949823260307312	0.330526471138	male	male	adult		owned	roaming	entire	healthy	0
1997	1.09036916144411	High	5	residential	0.0463465452194214	0.173745393753052	female	female_preg/lact	adult	yes_lact	owned	roaming	entire	disease	1
1998	0.447331415653373	High	5	residential	0.0543613433837891	0.180977523326874	female	female	adult	not_preglact	owned	roaming	entire	healthy	1
1999	0.789145353323442	High	5	residential	0.11014312505722	0.314207196235657	male	male	adult		owned	roaming	entire	disease	0
[truncated: 20,925 more rows]
